# Supplementary material for: Identification of ferroptosis-related genes in syncytiotrophoblast-derived extracellular vesicles of preeclampsia
Source: PubMed Central journal article supplement (PMC9646584; doi:10.1097/md.0000000000031583), 2022-11-04
Supplement: medi-101-e31583-s001.pdf [file medi-101-e31583-s001.pdf]

| id       | baseMean | log2FoldChange | lfcSE   | stat    | pvalue   | padj     |
|----------|----------|----------------|---------|---------|----------|----------|
| A1CF     | 8.295643 | 5.959823       | 1.56577 | 3.80631 | 0.000141 | 0.00283  |
| AADAT    | 7.147836 | 3.284278       | 0.79777 | 4.11682 | 3.84E-05 | 0.00106  |
| AASS     | 20.66291 | 1.946225       | 0.6238  | 3.11995 | 0.001809 | 0.015833 |
| ABCA1    | 196.9982 | 1.075252       | 0.32801 | 3.27812 | 0.001045 | 0.010968 |
| ABCA12   | 25.38591 | 2.034334       | 0.71972 | 2.82656 | 0.004705 | 0.029562 |
| ABCA13   | 20.80088 | 2.295262       | 0.83321 | 2.75472 | 0.005874 | 0.034026 |
| ABCA17P  | 3.718732 | 5.211693       | 1.43345 | 3.63577 | 0.000277 | 0.004526 |
| ABCA3    | 2.803627 | 3.846925       | 1.05055 | 3.66183 | 0.00025  | 0.004218 |
| ABCA7    | 11.9747  | 1.536257       | 0.51482 | 2.98405 | 0.002845 | 0.02136  |
| ABCA8    | 9.737935 | 3.214558       | 1.01753 | 3.15916 | 0.001582 | 0.014584 |
| ABCB11   | 2.925585 | 3.843166       | 1.46357 | 2.62589 | 0.008642 | 0.043324 |
| ABCB5    | 11.38569 | 5.423432       | 1.43476 | 3.78004 | 0.000157 | 0.003065 |
| ABCC9    | 12.34539 | 3.953262       | 0.98676 | 4.00629 | 6.17E-05 | 0.001548 |
| ABCD2    | 7.48242  | 2.792828       | 1.0551  | 2.64698 | 0.008121 | 0.041551 |
| ABHD2    | 16.89635 | 1.114353       | 0.38544 | 2.8911  | 0.003839 | 0.026147 |
| ABI3BP   | 12.79183 | 2.796295       | 0.77801 | 3.59418 | 0.000325 | 0.005064 |
| ABLIM3   | 28.67073 | 1.86818        | 0.43661 | 4.27884 | 1.88E-05 | 0.000614 |
| ACAP1    | 7.524122 | 1.621669       | 0.61345 | 2.64351 | 0.008205 | 0.041741 |
| ACKR3    | 13.96508 | 2.047564       | 0.61496 | 3.32961 | 0.00087  | 0.009689 |
| ACKR4    | 1.690322 | 4.026024       | 1.57426 | 2.55741 | 0.010545 | 0.049417 |
| ACOT4    | 31.94865 | -1.08207       | 0.36023 | -3.0039 | 0.002666 | 0.020434 |
| ACOXL    | 195.9034 | -1.01143       | 0.2264  | -4.4675 | 7.92E-06 | 0.000324 |
| ACP6     | 19.44818 | 1.044759       | 0.31618 | 3.30431 | 0.000952 | 0.010278 |
| ACSM1    | 6.032311 | 4.450732       | 1.41892 | 3.13671 | 0.001709 | 0.015286 |
| ACSS3    | 10.16864 | 2.652344       | 1.00129 | 2.64894 | 0.008074 | 0.041429 |
| ACTN1    | 68.60407 | 1.352274       | 0.30088 | 4.49441 | 6.98E-06 | 0.000292 |
| ADA      | 2.780251 | 3.353949       | 1.31322 | 2.55399 | 0.01065  | 0.049588 |
| ADAD1    | 4.172711 | 4.946844       | 1.60367 | 3.0847  | 0.002038 | 0.017059 |
| ADAM20   | 9.84865  | 2.419209       | 0.90589 | 2.67054 | 0.007573 | 0.039805 |
| ADAM22   | 15.28208 | 3.721227       | 1.15586 | 3.21946 | 0.001284 | 0.012703 |
| ADAM28   | 12.17895 | 3.642067       | 1.08129 | 3.36826 | 0.000756 | 0.008888 |
| ADAM32   | 1.420913 | 3.921516       | 1.50645 | 2.60315 | 0.009237 | 0.045407 |
| ADAM9    | 130.5419 | 1.09599        | 0.22743 | 4.81903 | 1.44E-06 | 8.21E-05 |
| ADAMTS1  | 22.07584 | 1.938805       | 0.40959 | 4.73356 | 2.21E-06 | 0.000115 |
| ADAMTS20 | 15.7618  | 4.334039       | 1.07633 | 4.0267  | 5.66E-05 | 0.001438 |
| ADAMTS5  | 13.09089 | 1.492149       | 0.50463 | 2.95689 | 0.003108 | 0.022703 |
| ADAMTS9  | 11.01317 | 2.81549        | 0.91361 | 3.08171 | 0.002058 | 0.017194 |
| ADAMTSL3 | 9.476522 | 3.905851       | 1.09113 | 3.57964 | 0.000344 | 0.005268 |
| ADAT2    | 7.757415 | 3.715517       | 1.10683 | 3.35689 | 0.000788 | 0.009168 |
| ADCY1    | 9.66093  | 4.703695       | 1.24493 | 3.77828 | 0.000158 | 0.003077 |
| ADCY10P1 | 6.619845 | 4.557223       | 1.26941 | 3.59003 | 0.000331 | 0.00512  |
| ADD2     | 4.782876 | 3.310702       | 1.1924  | 2.7765  | 0.005495 | 0.032731 |
| ADGB     | 12.66366 | 3.939739       | 1.29193 | 3.0495  | 0.002292 | 0.018585 |

|         |          |          |         |         |          |          |
|---------|----------|----------|---------|---------|----------|----------|
| ADGRE4P | 4.87618  | 5.167061 | 1.85665 | 2.783   | 0.005386 | 0.032321 |
| ADGRF1  | 6.25016  | 3.710013 | 1.21692 | 3.04868 | 0.002298 | 0.018617 |
| ADGRF5  | 9.25461  | 1.6943   | 0.6072  | 2.79035 | 0.005265 | 0.031797 |
| ADGRG1  | 97.43557 | 1.078316 | 0.29503 | 3.65497 | 0.000257 | 0.004302 |
| ADGRG4  | 4.552291 | 4.028419 | 1.42952 | 2.81803 | 0.004832 | 0.030045 |
| ADGRG7  | 3.252252 | 4.495644 | 1.56575 | 2.87124 | 0.004089 | 0.027179 |
| ADH1B   | 6.591873 | 3.343797 | 1.21083 | 2.76156 | 0.005753 | 0.033574 |
| ADIRF   | 248.7479 | -1.08762 | 0.21866 | -4.9741 | 6.56E-07 | 4.29E-05 |
| ADRA1A  | 17.43804 | 4.082216 | 1.17426 | 3.47643 | 0.000508 | 0.006909 |
| ADRA2C  | 6.071885 | 2.134454 | 0.80653 | 2.64646 | 0.008134 | 0.041565 |
| ADSS1   | 20.39641 | -1.18518 | 0.43916 | -2.6988 | 0.00696  | 0.037645 |
| AFAP1   | 117.4915 | 2.305902 | 0.29677 | 7.76989 | 7.86E-15 | 5.94E-12 |
| AFAP1L2 | 7.206636 | 2.220933 | 0.56597 | 3.92409 | 8.71E-05 | 0.002002 |
| AFF3    | 111.9992 | -1.74441 | 0.37115 | -4.7    | 2.60E-06 | 0.000129 |
| AFM     | 4.26953  | 4.427109 | 1.65787 | 2.67035 | 0.007577 | 0.03981  |
| AGAP11  | 11.68887 | -1.05889 | 0.38107 | -2.7787 | 0.005457 | 0.032572 |
| AGBL3   | 7.279536 | 2.566402 | 0.88601 | 2.89659 | 0.003772 | 0.025777 |
| AGMO    | 4.300644 | 4.976231 | 1.57752 | 3.15446 | 0.001608 | 0.014704 |
| AGPAT1  | 4.487933 | -2.74396 | 0.95981 | -2.8589 | 0.004252 | 0.027841 |
| AGPAT5  | 413.1159 | -1.23217 | 0.47265 | -2.6069 | 0.009136 | 0.045142 |
| AGXT2   | 5.345279 | 3.787607 | 1.12965 | 3.35289 | 0.0008   | 0.009229 |
| AHNAK2  | 9.957996 | 1.924572 | 0.67012 | 2.872   | 0.004079 | 0.027159 |
| AHRR    | 8.588824 | 1.50205  | 0.4971  | 3.02163 | 0.002514 | 0.019773 |
| AHSP    | 13.41883 | 2.116514 | 0.81917 | 2.58373 | 0.009774 | 0.047028 |
| AICDA   | 22.87105 | -1.25813 | 0.37704 | -3.3369 | 0.000847 | 0.009519 |
| AIF1L   | 218.8066 | 1.335565 | 0.41001 | 3.25739 | 0.001124 | 0.011564 |
| AK4     | 30.04944 | 2.686298 | 0.57313 | 4.68708 | 2.77E-06 | 0.000136 |
| AKAP1   | 9.941107 | 1.618211 | 0.55657 | 2.90745 | 0.003644 | 0.025218 |
| AKAP6   | 14.85976 | 2.366883 | 0.83501 | 2.83457 | 0.004589 | 0.02909  |
| AKNA    | 28.40596 | 1.368178 | 0.51868 | 2.6378  | 0.008345 | 0.042211 |
| AKR1C6P | 3.097389 | 4.973931 | 1.73764 | 2.86247 | 0.004204 | 0.02767  |
| ALB     | 4.252465 | 5.435157 | 1.41947 | 3.829   | 0.000129 | 0.002644 |
| ALCAM   | 10.66593 | 2.588333 | 0.79977 | 3.23636 | 0.001211 | 0.012119 |
| ALDH1A1 | 14.28302 | 1.875985 | 0.62833 | 2.98565 | 0.00283  | 0.021288 |
| ALDH1B1 | 5.007013 | 3.091356 | 0.80528 | 3.83884 | 0.000124 | 0.002574 |
| ALDH1L1 | 2.422918 | 3.540818 | 1.29937 | 2.72503 | 0.00643  | 0.035906 |
| ALDH1L2 | 6.104613 | 3.300515 | 1.24177 | 2.65791 | 0.007863 | 0.040806 |
| ALDH7A1 | 22.40005 | 1.044436 | 0.31823 | 3.282   | 0.001031 | 0.010863 |
| ALDOB   | 2.239006 | 4.5116   | 1.74351 | 2.58766 | 0.009663 | 0.046642 |
| ALOX15  | 2.755411 | 2.850541 | 1.08007 | 2.63921 | 0.00831  | 0.042098 |
| ALX1    | 3.611005 | 5.208144 | 1.77228 | 2.93867 | 0.003296 | 0.023569 |
| AMIGO2  | 6.076522 | 2.209212 | 0.74047 | 2.98352 | 0.00285  | 0.021373 |
| AMOTL2  | 239.4417 | 1.141197 | 0.20783 | 5.49107 | 3.99E-08 | 4.39E-06 |
| AMPH    | 6.038543 | 3.658581 | 1.37149 | 2.6676  | 0.007639 | 0.039996 |

|            |          |          |         |         |          |          |
|------------|----------|----------|---------|---------|----------|----------|
| ANGPTL1    | 4.02589  | 3.780421 | 1.14204 | 3.31024 | 0.000932 | 0.010155 |
| ANGPTL5    | 4.612715 | 5.089361 | 1.79766 | 2.8311  | 0.004639 | 0.029364 |
| ANK2       | 19.02952 | 3.262561 | 0.92897 | 3.51204 | 0.000445 | 0.006273 |
| ANKRD18A   | 7.291941 | 2.27878  | 0.81704 | 2.78906 | 0.005286 | 0.03189  |
| ANKRD20A5P | 26.48322 | -1.0932  | 0.38672 | -2.8269 | 0.0047   | 0.029558 |
| ANKRD20A8P | 6.836237 | 3.969343 | 1.395   | 2.8454  | 0.004436 | 0.028569 |
| ANKRD26P1  | 9.520297 | 2.516742 | 0.96431 | 2.60988 | 0.009057 | 0.044876 |
| ANKRD26P3  | 5.203386 | 3.749    | 1.38573 | 2.70544 | 0.006821 | 0.037257 |
| ANKRD30A   | 8.880893 | 4.255658 | 1.24008 | 3.43176 | 0.0006   | 0.007682 |
| ANKRD30B   | 12.23072 | 4.672374 | 1.29588 | 3.60556 | 0.000311 | 0.004908 |
| ANKRD30BL  | 2.558715 | 4.679052 | 1.82583 | 2.5627  | 0.010386 | 0.048983 |
| ANKRD30BP2 | 4.479079 | 5.012639 | 1.51613 | 3.30622 | 0.000946 | 0.01026  |
| ANKRD31    | 11.41949 | 3.156879 | 0.93404 | 3.3798  | 0.000725 | 0.008617 |
| ANKRD33B   | 10.80402 | 2.159386 | 0.60659 | 3.55989 | 0.000371 | 0.005575 |
| ANKRD36    | 10.91766 | 3.63811  | 1.16584 | 3.12059 | 0.001805 | 0.015825 |
| ANKRD36B   | 4.002793 | 4.340937 | 1.49322 | 2.9071  | 0.003648 | 0.025236 |
| ANKRD36C   | 13.54102 | 2.726807 | 0.99341 | 2.74489 | 0.006053 | 0.034629 |
| ANKRD37    | 7.035523 | 2.171871 | 0.58202 | 3.73159 | 0.00019  | 0.003496 |
| ANKRD45    | 7.674339 | 3.345603 | 1.21372 | 2.75649 | 0.005842 | 0.033905 |
| ANKRD62    | 8.681294 | 3.480774 | 1.06279 | 3.27513 | 0.001056 | 0.011051 |
| ANKRD65    | 12.26129 | 1.671063 | 0.49979 | 3.34355 | 0.000827 | 0.009424 |
| ANLN       | 15.11721 | 1.644013 | 0.60165 | 2.73253 | 0.006285 | 0.035516 |
| ANO4       | 4.488811 | 3.460308 | 1.29948 | 2.66284 | 0.007748 | 0.040347 |
| ANTXR1     | 22.42895 | 1.495736 | 0.40574 | 3.68643 | 0.000227 | 0.003953 |
| ANXA10     | 2.867669 | 4.864014 | 1.76373 | 2.7578  | 0.005819 | 0.033866 |
| AOAH       | 7.733157 | 3.042634 | 1.16836 | 2.60418 | 0.009209 | 0.045323 |
| AP1S2      | 26.8756  | 1.006567 | 0.37423 | 2.68973 | 0.007151 | 0.038269 |
| APAF1      | 32.8236  | 1.079781 | 0.32746 | 3.29741 | 0.000976 | 0.010461 |
| APCDD1     | 7.818658 | 1.826802 | 0.61581 | 2.96649 | 0.003012 | 0.022267 |
| APLN       | 27.42494 | 1.909229 | 0.3799  | 5.02567 | 5.02E-07 | 3.58E-05 |
| APOBEC3F   | 3.971506 | 2.10689  | 0.8181  | 2.57535 | 0.010014 | 0.047799 |
| APOBEC3G   | 6.006799 | 3.382658 | 1.10523 | 3.06059 | 0.002209 | 0.018119 |
| APOL4      | 85.85865 | 1.680082 | 0.50509 | 3.32629 | 0.00088  | 0.009759 |
| APOL6      | 45.1511  | 2.023621 | 0.45939 | 4.40498 | 1.06E-05 | 0.000403 |
| ARFGEF3    | 33.30354 | 1.057375 | 0.37117 | 2.84877 | 0.004389 | 0.028324 |
| ARGFX      | 3.327917 | 4.570571 | 1.60703 | 2.84412 | 0.004453 | 0.028651 |
| ARHGAP15   | 9.466173 | 2.370514 | 0.86172 | 2.7509  | 0.005943 | 0.034255 |
| ARHGAP20   | 6.578694 | 3.57822  | 1.23964 | 2.8865  | 0.003895 | 0.026301 |
| ARHGAP30   | 30.29844 | 1.365994 | 0.39308 | 3.47509 | 0.000511 | 0.006926 |
| ARHGAP45   | 160.6937 | 2.188551 | 0.3514  | 6.22808 | 4.72E-10 | 9.31E-08 |
| ARHGAP6    | 5.916247 | 2.769356 | 0.94418 | 2.93308 | 0.003356 | 0.023862 |
| ARHGAP9    | 5.426136 | 1.733423 | 0.64816 | 2.67437 | 0.007487 | 0.039492 |
| ARHGEF28   | 27.60482 | 2.307504 | 0.64652 | 3.56913 | 0.000358 | 0.005413 |
| ARHGEF4    | 15.1502  | 2.932771 | 0.45832 | 6.39891 | 1.56E-10 | 4.22E-08 |

|         |          |          |         |         |          |          |
|---------|----------|----------|---------|---------|----------|----------|
| ARL13B  | 9.3966   | 3.336193 | 0.83684 | 3.98667 | 6.70E-05 | 0.001659 |
| ARLNC1  | 5.260477 | 1.617242 | 0.58747 | 2.75291 | 0.005907 | 0.034094 |
| ARMC3   | 8.708931 | 4.330912 | 1.29978 | 3.33204 | 0.000862 | 0.009626 |
| ARMS2   | 769.3735 | 2.714085 | 0.48907 | 5.54946 | 2.87E-08 | 3.38E-06 |
| ARNT2   | 170.9496 | 2.914995 | 0.46348 | 6.28937 | 3.19E-10 | 7.06E-08 |
| ARPP21  | 15.33489 | 3.943578 | 1.075   | 3.66845 | 0.000244 | 0.004153 |
| ARRDC4  | 28.83811 | 1.200894 | 0.47076 | 2.55098 | 0.010742 | 0.049876 |
| ART4    | 3.204856 | 2.714041 | 1.03414 | 2.62445 | 0.008679 | 0.043441 |
| ASAH1   | 387.7555 | -1.1876  | 0.23596 | -5.033  | 4.83E-07 | 3.52E-05 |
| ASAP2   | 47.05652 | 1.144196 | 0.32942 | 3.47338 | 0.000514 | 0.00695  |
| ASB15   | 3.316661 | 4.546729 | 1.7509  | 2.5968  | 0.00941  | 0.04589  |
| ASB5    | 3.720509 | 3.738075 | 1.15242 | 3.24368 | 0.00118  | 0.011938 |
| ASCL2   | 3.56527  | 2.000092 | 0.72682 | 2.75184 | 0.005926 | 0.034192 |
| ASIP    | 2.045472 | 3.818756 | 1.47641 | 2.58651 | 0.009695 | 0.046761 |
| ASNS    | 10.59    | 1.731258 | 0.53379 | 3.2433  | 0.001182 | 0.011946 |
| ASPHD2  | 3.019806 | 4.404614 | 1.48171 | 2.97265 | 0.002952 | 0.021935 |
| ASPM    | 22.28085 | 2.164106 | 0.78323 | 2.76304 | 0.005727 | 0.03349  |
| ASTE1   | 57.41964 | 1.05139  | 0.40552 | 2.59268 | 0.009523 | 0.046184 |
| ATL1    | 7.835183 | 3.753606 | 1.0835  | 3.46435 | 0.000532 | 0.007084 |
| ATP10B  | 8.678631 | 3.474272 | 1.11412 | 3.11839 | 0.001818 | 0.015908 |
| ATP11A  | 111.8925 | 1.091067 | 0.17238 | 6.32938 | 2.46E-10 | 5.85E-08 |
| ATP11B  | 31.54224 | 1.483668 | 0.41975 | 3.53461 | 0.000408 | 0.005959 |
| ATP13A5 | 6.550142 | 4.622946 | 1.73469 | 2.665   | 0.007699 | 0.040216 |
| ATP2A3  | 15.76609 | 1.895912 | 0.56387 | 3.36233 | 0.000773 | 0.009037 |
| ATP8    | 748.8114 | 1.060109 | 0.28762 | 3.68574 | 0.000228 | 0.003957 |
| ATP8A1  | 18.72682 | 2.820416 | 0.69254 | 4.07256 | 4.65E-05 | 0.001228 |
| ATP8B1  | 23.29473 | 1.009264 | 0.28419 | 3.55133 | 0.000383 | 0.005722 |
| ATP8B4  | 16.67479 | 2.49947  | 0.78363 | 3.18961 | 0.001425 | 0.01358  |
| ATP9A   | 14.21012 | 2.522235 | 0.77699 | 3.24616 | 0.00117  | 0.011856 |
| ATRNL1  | 13.951   | 3.133238 | 0.96155 | 3.25851 | 0.00112  | 0.011525 |
| ATXN8OS | 3.339363 | 5.086611 | 1.75218 | 2.90302 | 0.003696 | 0.025404 |
| AVPR1A  | 7.899682 | 3.049116 | 1.07954 | 2.82446 | 0.004736 | 0.029677 |
| AXDND1  | 7.448358 | 3.689972 | 1.00607 | 3.6677  | 0.000245 | 0.004161 |
| AXIN2   | 23.90192 | 2.642613 | 0.47541 | 5.55862 | 2.72E-08 | 3.26E-06 |
| AZIN2   | 2.886168 | 4.889324 | 1.30517 | 3.74612 | 0.00018  | 0.00338  |
| B2M     | 156.5188 | 1.147452 | 0.39112 | 2.93373 | 0.003349 | 0.023842 |
| B3GAT1  | 2.786081 | 4.243922 | 1.52629 | 2.78055 | 0.005427 | 0.032492 |
| B3GNT2  | 54.73586 | -1.01488 | 0.31353 | -3.2369 | 0.001208 | 0.012119 |
| B4GALT6 | 7.017168 | 3.205639 | 1.04357 | 3.07181 | 0.002128 | 0.017676 |
| BACE1   | 6.227056 | 2.6673   | 0.83527 | 3.19333 | 0.001406 | 0.013486 |
| BAMBI   | 1.500485 | 3.246522 | 1.27112 | 2.55407 | 0.010647 | 0.049588 |
| BATF3   | 2.949099 | 2.732975 | 0.94595 | 2.88914 | 0.003863 | 0.026185 |
| BBOX1   | 36.45644 | -1.03114 | 0.33683 | -3.0613 | 0.002204 | 0.018086 |
| BCAT1   | 71.80673 | 2.065389 | 0.43698 | 4.7265  | 2.28E-06 | 0.000117 |

|                 |          |          |         |         |          |          |
|-----------------|----------|----------|---------|---------|----------|----------|
| BCHE            | 3.706888 | 5.232988 | 1.49473 | 3.50097 | 0.000464 | 0.006473 |
| BCL11B          | 10.90534 | 2.26178  | 0.72781 | 3.10765 | 0.001886 | 0.016286 |
| BCL6            | 260.3427 | 2.354459 | 0.292   | 8.0632  | 7.43E-16 | 7.07E-13 |
| BCOR            | 17.03048 | 1.909589 | 0.43509 | 4.38896 | 1.14E-05 | 0.000425 |
| BDH2            | 4.825778 | 4.592884 | 1.48189 | 3.09935 | 0.001939 | 0.016577 |
| BEND2           | 12.97103 | 1.529148 | 0.59587 | 2.56623 | 0.010281 | 0.048729 |
| BEST1           | 2.779265 | 4.770489 | 1.55414 | 3.06954 | 0.002144 | 0.017729 |
| BHLHE22         | 2.973786 | 4.421665 | 1.26623 | 3.49199 | 0.000479 | 0.006614 |
| BHLHE40         | 268.9213 | 1.84019  | 0.32251 | 5.70577 | 1.16E-08 | 1.55E-06 |
| BHLHE40-<br>AS1 | 2.938976 | 3.845894 | 1.11187 | 3.45893 | 0.000542 | 0.007193 |
| BHMT2           | 2.542532 | 3.58346  | 1.39816 | 2.56299 | 0.010378 | 0.048983 |
| BICC1           | 6.989252 | 3.897721 | 1.1704  | 3.33025 | 0.000868 | 0.009674 |
| BICD1           | 12.96561 | 4.63613  | 1.061   | 4.36958 | 1.24E-05 | 0.000454 |
| BIN2            | 115.438  | 2.150016 | 0.2842  | 7.56507 | 3.88E-14 | 2.24E-11 |
| BIRC3           | 23.45681 | 1.543172 | 0.55949 | 2.75816 | 0.005813 | 0.03384  |
| BIRC5           | 6.846673 | 2.385788 | 0.78807 | 3.02737 | 0.002467 | 0.019522 |
| BIRC7           | 3.822716 | 2.659436 | 0.87638 | 3.03456 | 0.002409 | 0.019205 |
| BMPER           | 5.282046 | 2.94625  | 0.95945 | 3.07076 | 0.002135 | 0.017686 |
| BMPR1B          | 10.89754 | 2.232596 | 0.81747 | 2.73111 | 0.006312 | 0.035579 |
| BNC2            | 23.18562 | 1.421018 | 0.49536 | 2.86867 | 0.004122 | 0.02729  |
| BNIP1           | 28.25487 | 1.12079  | 0.2824  | 3.96874 | 7.23E-05 | 0.001754 |
| BOC             | 3.818178 | 2.591127 | 0.9832  | 2.6354  | 0.008404 | 0.042418 |
| BOLL            | 2.771002 | 3.761286 | 1.35516 | 2.77552 | 0.005511 | 0.032749 |
| BRDT            | 5.842654 | 3.7499   | 1.09333 | 3.42979 | 0.000604 | 0.007714 |
| BRINP3          | 3.439976 | 3.232706 | 1.05634 | 3.06029 | 0.002211 | 0.018129 |
| BRIP1           | 19.67209 | 1.793102 | 0.62782 | 2.85609 | 0.004289 | 0.027926 |
| BTBD8           | 13.13333 | 1.049183 | 0.40122 | 2.615   | 0.008923 | 0.044389 |
| BTG2            | 889.7184 | -1.0944  | 0.18573 | -5.8924 | 3.81E-09 | 5.67E-07 |
| BTN2A2          | 4.3909   | 3.134217 | 0.99754 | 3.14195 | 0.001678 | 0.015124 |
| BTN2A3P         | 2.423014 | 4.595618 | 1.75573 | 2.61749 | 0.008858 | 0.044172 |
| BTN3A1          | 7.758331 | 2.206151 | 0.75014 | 2.94098 | 0.003272 | 0.023456 |
| BTN3A2          | 9.616029 | 1.58877  | 0.59294 | 2.67949 | 0.007373 | 0.039046 |
| BUB1            | 8.524445 | 2.941725 | 1.1018  | 2.66994 | 0.007587 | 0.039835 |
| BUB1B           | 8.451458 | 2.571351 | 0.94849 | 2.71099 | 0.006708 | 0.036838 |
| BVES            | 3.720925 | 4.154848 | 1.38836 | 2.99264 | 0.002766 | 0.020914 |
| C10orf67        | 7.640118 | 4.069419 | 1.18283 | 3.44041 | 0.000581 | 0.007554 |
| C11orf87        | 4.443233 | 5.504782 | 1.58896 | 3.46439 | 0.000531 | 0.007084 |
| C12orf40        | 3.590967 | 4.660209 | 1.50574 | 3.09496 | 0.001968 | 0.016723 |
| C12orf42        | 13.84115 | 6.696857 | 1.35568 | 4.93984 | 7.82E-07 | 4.96E-05 |
| C12orf50        | 4.734156 | 5.101342 | 1.68526 | 3.02704 | 0.00247  | 0.019522 |
| C12orf75        | 233.0596 | 1.62888  | 0.32132 | 5.06933 | 3.99E-07 | 2.96E-05 |
| C14orf39        | 14.78966 | 3.627489 | 0.98191 | 3.69433 | 0.00022  | 0.00387  |
| C15orf48        | 7.043288 | 1.947403 | 0.6586  | 2.95688 | 0.003108 | 0.022703 |

|                  |          |          |         |         |          |          |
|------------------|----------|----------|---------|---------|----------|----------|
| C19orf33         | 7.266467 | 1.446282 | 0.56486 | 2.56044 | 0.010454 | 0.049188 |
| C1orf21          | 133.3294 | 1.001629 | 0.21723 | 4.61102 | 4.01E-06 | 0.000182 |
| C1QA             | 10.54658 | 2.024953 | 0.69099 | 2.93052 | 0.003384 | 0.023953 |
| C1QB             | 12.87921 | 2.455244 | 0.83757 | 2.93138 | 0.003375 | 0.02392  |
| C1QTNF7          | 4.044645 | 3.779265 | 1.29202 | 2.92509 | 0.003444 | 0.024189 |
| C2CD6            | 9.23841  | 3.000074 | 1.02205 | 2.93535 | 0.003332 | 0.02376  |
| C4BPA            | 2.576863 | 4.053517 | 1.24518 | 3.25536 | 0.001132 | 0.011617 |
| C4orf47          | 3.118683 | 3.058852 | 1.1349  | 2.69525 | 0.007034 | 0.037887 |
| C4orf54          | 6.922164 | 5.683245 | 1.45873 | 3.89601 | 9.78E-05 | 0.002156 |
| C5orf46          | 22.33383 | 1.388474 | 0.44815 | 3.09826 | 0.001947 | 0.016607 |
| C6               | 5.308854 | 4.768238 | 1.3948  | 3.41858 | 0.000629 | 0.007956 |
| C8A              | 2.331494 | 4.017114 | 1.54612 | 2.59819 | 0.009372 | 0.045826 |
| C8orf34          | 7.14657  | 3.645065 | 1.14447 | 3.18493 | 0.001448 | 0.013713 |
| C8orf58          | 114.6231 | 1.945048 | 0.25276 | 7.69536 | 1.41E-14 | 9.12E-12 |
| CA10             | 96.01323 | -1.27213 | 0.49707 | -2.5592 | 0.01049  | 0.049272 |
| CA12             | 5.33459  | 3.173343 | 1.01909 | 3.11389 | 0.001846 | 0.01604  |
| CA8              | 9.368459 | 2.482927 | 0.79776 | 3.11237 | 0.001856 | 0.016105 |
| CACNA1D          | 6.382752 | 3.469207 | 1.14962 | 3.0177  | 0.002547 | 0.019902 |
| CACNA1E          | 9.187776 | 5.125439 | 1.46179 | 3.50627 | 0.000454 | 0.006377 |
| CACNA1I          | 2.49203  | 3.567524 | 1.38131 | 2.58271 | 0.009803 | 0.047137 |
| CACNA2D1         | 19.28462 | 3.985676 | 1.1387  | 3.50021 | 0.000465 | 0.006479 |
| CACNA2D1-<br>AS1 | 4.90851  | 5.162957 | 1.64001 | 3.14813 | 0.001643 | 0.014944 |
| CACNB2           | 3.721928 | 5.274657 | 1.95361 | 2.69995 | 0.006935 | 0.037611 |
| CACNG8           | 4.234142 | 5.466541 | 1.95613 | 2.79457 | 0.005197 | 0.031527 |
| CADM2            | 13.85549 | 2.973078 | 1.04175 | 2.85392 | 0.004318 | 0.028035 |
| CADPS            | 7.151498 | 4.670947 | 1.41334 | 3.3049  | 0.00095  | 0.010278 |
| CADPS2           | 11.37384 | 1.731255 | 0.65273 | 2.65233 | 0.007994 | 0.041197 |
| CALCRL           | 15.98037 | 1.482727 | 0.54505 | 2.72037 | 0.006521 | 0.036215 |
| CAMK2N1          | 43.31346 | 2.389638 | 0.6052  | 3.94853 | 7.86E-05 | 0.001856 |
| CAMK4            | 6.473582 | 3.491458 | 1.23804 | 2.82015 | 0.0048   | 0.029963 |
| CAPN13           | 3.293527 | 4.579664 | 1.57714 | 2.90378 | 0.003687 | 0.025364 |
| CAPN2            | 57.89145 | 1.347168 | 0.33018 | 4.08008 | 4.50E-05 | 0.001207 |
| CARD10           | 3.439764 | 2.762785 | 1.04353 | 2.64754 | 0.008108 | 0.041517 |
| CARD17           | 14.21611 | 1.929113 | 0.64263 | 3.00189 | 0.002683 | 0.020542 |
| CASP5            | 5.883542 | 4.925781 | 1.40427 | 3.50771 | 0.000452 | 0.006354 |
| CASR             | 3.519695 | 4.646862 | 1.64335 | 2.82768 | 0.004689 | 0.02953  |
| CAV1             | 63.35934 | 1.289644 | 0.2616  | 4.92992 | 8.23E-07 | 5.15E-05 |
| CAV2             | 21.98483 | 1.8555   | 0.32541 | 5.70209 | 1.18E-08 | 1.56E-06 |
| CAVIN2           | 125.2418 | 1.330995 | 0.44091 | 3.01871 | 0.002539 | 0.019864 |
| CBLN2            | 5.530989 | 5.854877 | 1.70555 | 3.43283 | 0.000597 | 0.007658 |
| CBLN4            | 4.19207  | 4.384416 | 1.49893 | 2.92504 | 0.003444 | 0.024189 |
| CBX6             | 51.46573 | 1.018664 | 0.30119 | 3.38211 | 0.000719 | 0.008591 |
| CCBE1            | 3.542211 | 4.638319 | 1.4807  | 3.13251 | 0.001733 | 0.015413 |

|           |          |          |         |         |          |          |
|-----------|----------|----------|---------|---------|----------|----------|
| CCDC102B  | 10.37795 | 4.892135 | 1.38014 | 3.54467 | 0.000393 | 0.005788 |
| CCDC110   | 2.098438 | 4.475999 | 1.5506  | 2.88662 | 0.003894 | 0.026301 |
| CCDC138   | 17.2137  | 1.171851 | 0.31916 | 3.67168 | 0.000241 | 0.004122 |
| CCDC141   | 11.39303 | 3.516355 | 1.13946 | 3.08598 | 0.002029 | 0.017021 |
| CCDC144NL | 7.948319 | 5.368272 | 1.36845 | 3.92287 | 8.75E-05 | 0.002007 |
| CCDC146   | 10.46113 | 1.310883 | 0.46798 | 2.80115 | 0.005092 | 0.031111 |
| CCDC158   | 8.948886 | 3.627555 | 1.03449 | 3.50661 | 0.000454 | 0.006375 |
| CCDC168   | 10.99839 | 2.964301 | 0.9385  | 3.15854 | 0.001586 | 0.014607 |
| CCDC172   | 4.908947 | 5.655341 | 1.71081 | 3.30566 | 0.000948 | 0.01026  |
| CCDC179   | 2.661676 | 4.746603 | 1.81862 | 2.61    | 0.009054 | 0.044874 |
| CCDC183   | 12.33361 | 1.191212 | 0.40609 | 2.93334 | 0.003353 | 0.023862 |
| CCDC191   | 11.70525 | 2.715358 | 0.86867 | 3.12588 | 0.001773 | 0.015687 |
| CCDC198   | 2.7385   | 4.799735 | 1.74122 | 2.75653 | 0.005842 | 0.033905 |
| CCDC26    | 2.862702 | 4.323697 | 1.67212 | 2.58575 | 0.009717 | 0.046809 |
| CCDC38    | 3.927124 | 5.310828 | 1.60024 | 3.31877 | 0.000904 | 0.009941 |
| CCDC39    | 6.968384 | 3.943497 | 1.38718 | 2.84281 | 0.004472 | 0.0287   |
| CCDC40    | 12.04572 | 1.189111 | 0.43668 | 2.72304 | 0.006468 | 0.036035 |
| CCDC73    | 6.417565 | 3.072746 | 1.14138 | 2.69212 | 0.0071   | 0.038134 |
| CCDC8     | 2.728013 | 2.611625 | 0.90979 | 2.87059 | 0.004097 | 0.027199 |
| CCDC80    | 15.07819 | 1.70047  | 0.61915 | 2.74644 | 0.006025 | 0.034514 |
| CCDC83    | 5.053416 | 4.229845 | 1.59509 | 2.65179 | 0.008007 | 0.041237 |
| CCDC88A   | 33.68883 | 1.611884 | 0.5946  | 2.71088 | 0.00671  | 0.036838 |
| CCER1     | 4.101121 | 4.904651 | 1.81458 | 2.70291 | 0.006873 | 0.037428 |
| CCL21     | 7.963202 | 2.542123 | 0.81586 | 3.11588 | 0.001834 | 0.015984 |
| CCNA1     | 3.209345 | 4.466085 | 1.55679 | 2.86877 | 0.004121 | 0.02729  |
| CCNA2     | 8.882076 | 2.326819 | 0.72322 | 3.2173  | 0.001294 | 0.012746 |
| CCND2     | 59.49073 | 2.213141 | 0.50078 | 4.41939 | 9.90E-06 | 0.000381 |
| CCND3     | 118.4601 | 1.167515 | 0.23843 | 4.89675 | 9.74E-07 | 5.97E-05 |
| CCNF      | 6.456192 | 2.185555 | 0.72379 | 3.01961 | 0.002531 | 0.019853 |
| CCNG2     | 79.46148 | 1.018451 | 0.23474 | 4.33861 | 1.43E-05 | 0.000505 |
| CCNYL1    | 25.42277 | 1.294499 | 0.38706 | 3.34447 | 0.000824 | 0.009406 |
| CCR5AS    | 14.55266 | 4.395363 | 0.91183 | 4.82038 | 1.43E-06 | 8.19E-05 |
| CD160     | 1.875159 | 3.084072 | 1.20951 | 2.54986 | 0.010777 | 0.049979 |
| CD163     | 41.85339 | 1.325892 | 0.39409 | 3.36446 | 0.000767 | 0.008985 |
| CD226     | 39.35335 | 1.639467 | 0.55102 | 2.97534 | 0.002927 | 0.021804 |
| CD244     | 2.592711 | 4.180759 | 1.42071 | 2.94273 | 0.003253 | 0.023366 |
| CD28      | 6.803692 | 2.738127 | 0.84925 | 3.22418 | 0.001263 | 0.012569 |
| CD36      | 31.77893 | 1.362822 | 0.51925 | 2.6246  | 0.008675 | 0.043434 |
| CD4       | 6.885822 | 1.995856 | 0.77921 | 2.56139 | 0.010425 | 0.049124 |
| CD40      | 3.580385 | 4.128294 | 1.40011 | 2.94856 | 0.003193 | 0.023129 |
| CD6       | 2.025318 | 3.876191 | 1.23285 | 3.14408 | 0.001666 | 0.015044 |
| CD68      | 37.29286 | 2.177919 | 0.34801 | 6.25825 | 3.89E-10 | 8.08E-08 |
| CD7       | 1.647654 | 3.597502 | 1.35849 | 2.64816 | 0.008093 | 0.041497 |
| CD74      | 83.04709 | 1.612461 | 0.57684 | 2.79534 | 0.005184 | 0.031471 |

|          |          |          |         |         |          |          |
|----------|----------|----------|---------|---------|----------|----------|
| CD82     | 16.3162  | 1.311625 | 0.4101  | 3.19829 | 0.001382 | 0.013343 |
| CD84     | 11.12721 | 2.04212  | 0.59955 | 3.40607 | 0.000659 | 0.008171 |
| CD96     | 8.469382 | 2.075814 | 0.73481 | 2.82497 | 0.004729 | 0.029665 |
| CDC14B   | 31.26172 | 1.041593 | 0.27339 | 3.80987 | 0.000139 | 0.002796 |
| CDC45    | 3.337346 | 3.53994  | 1.3509  | 2.62044 | 0.008782 | 0.043873 |
| CDCA2    | 4.537105 | 2.295628 | 0.69977 | 3.28056 | 0.001036 | 0.010905 |
| CDCA7L   | 13.08996 | 1.747571 | 0.53129 | 3.2893  | 0.001004 | 0.010683 |
| CDH12    | 5.45221  | 4.809761 | 1.55237 | 3.09833 | 0.001946 | 0.016607 |
| CDH18    | 9.36907  | 5.15569  | 1.51508 | 3.40291 | 0.000667 | 0.008219 |
| CDH19    | 11.35554 | 4.688679 | 1.35802 | 3.45258 | 0.000555 | 0.007328 |
| CDH20    | 2.419924 | 4.097299 | 1.59669 | 2.56612 | 0.010284 | 0.048731 |
| CDH26    | 5.553148 | 3.237372 | 1.1593  | 2.79252 | 0.00523  | 0.031654 |
| CDH7     | 4.988729 | 4.667519 | 1.41266 | 3.30406 | 0.000953 | 0.010278 |
| CDK1     | 6.695123 | 2.654731 | 0.82985 | 3.19904 | 0.001379 | 0.013325 |
| CDKL1    | 4.991398 | 3.315916 | 1.10154 | 3.01024 | 0.00261  | 0.020164 |
| CDKN2A   | 5.741131 | 2.585489 | 0.87138 | 2.96713 | 0.003006 | 0.022259 |
| CDKN2C   | 11.04264 | 1.153389 | 0.4437  | 2.59946 | 0.009337 | 0.045743 |
| CDX1     | 1.611658 | 3.652684 | 1.31332 | 2.78125 | 0.005415 | 0.032449 |
| CEACAM19 | 43.68423 | 2.204898 | 0.36222 | 6.08722 | 1.15E-09 | 2.04E-07 |
| CENPE    | 15.53234 | 3.222306 | 0.9124  | 3.53168 | 0.000413 | 0.006017 |
| CENPF    | 17.33347 | 2.489089 | 0.65885 | 3.77791 | 0.000158 | 0.003077 |
| CENPK    | 9.825558 | 3.234049 | 0.90896 | 3.55797 | 0.000374 | 0.005605 |
| CENPW    | 9.234408 | 2.756433 | 0.89448 | 3.08159 | 0.002059 | 0.017194 |
| CEP126   | 8.754227 | 4.545121 | 1.21016 | 3.7558  | 0.000173 | 0.003286 |
| CEP250   | 27.50697 | 1.171033 | 0.33423 | 3.50368 | 0.000459 | 0.006423 |
| CEP70    | 29.20617 | 1.004095 | 0.34347 | 2.92341 | 0.003462 | 0.024263 |
| CEP72    | 8.96956  | 3.840513 | 0.83536 | 4.59745 | 4.28E-06 | 0.000194 |
| CERK     | 21.54143 | 2.381917 | 0.507   | 4.6981  | 2.63E-06 | 0.00013  |
| CERKL    | 7.672792 | 6.364006 | 2.23403 | 2.84866 | 0.00439  | 0.028324 |
| CERS4    | 16.52113 | 1.109382 | 0.37628 | 2.94832 | 0.003195 | 0.023132 |
| CFAP206  | 9.320007 | 2.254975 | 0.70971 | 3.17733 | 0.001486 | 0.013963 |
| CFAP20DC | 5.041345 | 4.701395 | 1.37142 | 3.42813 | 0.000608 | 0.007731 |
| CFAP47   | 14.06746 | 3.348249 | 0.98425 | 3.40183 | 0.000669 | 0.008231 |
| CFAP54   | 17.36037 | 3.378031 | 1.07024 | 3.15634 | 0.001598 | 0.014634 |
| CFAP61   | 5.334187 | 5.291497 | 1.65758 | 3.19231 | 0.001411 | 0.013526 |
| CFAP69   | 11.9681  | 4.240277 | 1.18052 | 3.59188 | 0.000328 | 0.005089 |
| CFAP91   | 7.106653 | 3.373215 | 1.29453 | 2.60574 | 0.009168 | 0.045214 |
| CFH      | 12.41166 | 3.612097 | 1.00789 | 3.58381 | 0.000339 | 0.005214 |
| CFHR4    | 3.604497 | 5.248677 | 1.95256 | 2.6881  | 0.007186 | 0.03833  |
| CFI      | 4.596852 | 4.54794  | 1.45443 | 3.12697 | 0.001766 | 0.015638 |
| CFTR     | 20.07958 | 1.940501 | 0.69355 | 2.79792 | 0.005143 | 0.031319 |
| CGB3     | 264.2484 | 2.169382 | 0.51973 | 4.17403 | 2.99E-05 | 0.000878 |
| CGB5     | 617.0299 | 1.797135 | 0.50175 | 3.58175 | 0.000341 | 0.005242 |
| CGB7     | 137.7987 | 2.033736 | 0.45632 | 4.4568  | 8.32E-06 | 0.000334 |



|           |          |          |         |         |          |          |
|-----------|----------|----------|---------|---------|----------|----------|
| CGB8      | 406.2218 | 1.795309 | 0.62467 | 2.87403 | 0.004053 | 0.027041 |
| CHI3L2    | 10.75909 | 2.590945 | 0.81282 | 3.18762 | 0.001434 | 0.01365  |
| CHL1      | 15.45352 | 3.768654 | 1.18392 | 3.18321 | 0.001457 | 0.013786 |
| CHMP1B2P  | 3.276338 | 4.56609  | 1.60775 | 2.84005 | 0.004511 | 0.028869 |
| CHP2      | 3.638483 | 2.298583 | 0.89465 | 2.56927 | 0.010191 | 0.048481 |
| CHRM2     | 5.823186 | 4.035836 | 1.49501 | 2.69954 | 0.006944 | 0.037632 |
| CHST8     | 3.358799 | 3.541661 | 1.3845  | 2.55808 | 0.010525 | 0.049364 |
| CHST9     | 7.114063 | 5.740529 | 1.68023 | 3.41652 | 0.000634 | 0.007999 |
| CHSY3     | 4.522077 | 4.01858  | 1.36079 | 2.95312 | 0.003146 | 0.022909 |
| CIT       | 8.936662 | 2.246502 | 0.67505 | 3.32788 | 0.000875 | 0.009723 |
| CLC       | 10.22743 | 2.415371 | 0.64466 | 3.74671 | 0.000179 | 0.003376 |
| CLCA3P    | 5.47595  | 5.841451 | 1.54074 | 3.79134 | 0.00015  | 0.002967 |
| CLCA4     | 5.730393 | 4.416186 | 1.39146 | 3.17377 | 0.001505 | 0.01407  |
| CLDN1     | 478.0734 | -2.17878 | 0.46612 | -4.6743 | 2.95E-06 | 0.000142 |
| CLDN16    | 55.14976 | -2.2608  | 0.43894 | -5.1506 | 2.60E-07 | 2.04E-05 |
| CLDN9     | 8.834476 | 2.872014 | 0.73424 | 3.91152 | 9.17E-05 | 0.002085 |
| CLEC12A   | 11.97206 | 3.246576 | 1.19263 | 2.7222  | 0.006485 | 0.036078 |
| CLGN      | 9.310862 | 3.616784 | 1.20067 | 3.01229 | 0.002593 | 0.020091 |
| CLIC2     | 6.174037 | 1.699803 | 0.65013 | 2.61455 | 0.008935 | 0.044417 |
| CLSPN     | 11.19008 | 2.21336  | 0.56755 | 3.89987 | 9.62E-05 | 0.002152 |
| CLU       | 46.86309 | 1.601898 | 0.41029 | 3.90431 | 9.45E-05 | 0.002131 |
| CLVS2     | 11.28899 | 5.358561 | 1.39412 | 3.84368 | 0.000121 | 0.002538 |
| CMBL      | 3.455    | 2.419803 | 0.8458  | 2.86096 | 0.004224 | 0.027744 |
| CNGB3     | 7.116759 | 4.233822 | 1.29506 | 3.26921 | 0.001078 | 0.011205 |
| CNKSR2    | 11.44415 | 2.447723 | 0.59408 | 4.12017 | 3.79E-05 | 0.00105  |
| CNN2      | 28.87996 | 1.247215 | 0.44249 | 2.81863 | 0.004823 | 0.030024 |
| CNR1      | 7.081538 | 3.850075 | 1.10187 | 3.49412 | 0.000476 | 0.006578 |
| CNTN4     | 10.01266 | 3.13012  | 0.92309 | 3.3909  | 0.000697 | 0.008398 |
| CNTN6     | 13.06048 | 2.939543 | 1.02237 | 2.87521 | 0.004038 | 0.026996 |
| CNTNAP3   | 8.934533 | 3.48075  | 1.2095  | 2.87785 | 0.004004 | 0.026826 |
| CNTNAP3B  | 5.074929 | 4.144564 | 1.5001  | 2.76285 | 0.00573  | 0.03349  |
| CNTNAP3P2 | 2.722972 | 4.280822 | 1.24656 | 3.4341  | 0.000595 | 0.007647 |
| CNTNAP4   | 11.25258 | 4.946874 | 1.2698  | 3.89578 | 9.79E-05 | 0.002156 |
| CNTRL     | 30.48217 | 1.398259 | 0.51614 | 2.70904 | 0.006748 | 0.03698  |
| COL11A1   | 25.62631 | 3.590634 | 0.92559 | 3.87927 | 0.000105 | 0.002261 |
| COL12A1   | 25.93329 | 2.58963  | 0.84725 | 3.05652 | 0.002239 | 0.018284 |
| COL15A1   | 48.59543 | 1.339455 | 0.31059 | 4.31261 | 1.61E-05 | 0.000548 |
| COL16A1   | 12.01299 | 1.867455 | 0.60511 | 3.08614 | 0.002028 | 0.017021 |
| COL17A1   | 166.1392 | 3.32032  | 0.44931 | 7.38982 | 1.47E-13 | 7.67E-11 |
| COL19A1   | 11.76611 | 4.753316 | 1.34645 | 3.53026 | 0.000415 | 0.006041 |
| COL22A1   | 12.65609 | 3.004681 | 1.14744 | 2.6186  | 0.008829 | 0.044065 |
| COL24A1   | 18.52263 | 3.39528  | 1.05907 | 3.2059  | 0.001346 | 0.013105 |
| COL27A1   | 54.17852 | 2.34028  | 0.45049 | 5.19494 | 2.05E-07 | 1.69E-05 |
| COL4A3    | 6.832665 | 3.56691  | 1.23443 | 2.88952 | 0.003858 | 0.026185 |

|          |          |          |         |         |          |          |
|----------|----------|----------|---------|---------|----------|----------|
| COL4A4   | 15.53171 | 4.429419 | 1.25491 | 3.52966 | 0.000416 | 0.00605  |
| COL5A2   | 29.41374 | 1.850335 | 0.62415 | 2.96455 | 0.003031 | 0.022357 |
| COL6A4P2 | 6.927484 | 3.895019 | 1.32283 | 2.94446 | 0.003235 | 0.023308 |
| COL6A5   | 8.245538 | 4.464528 | 1.48828 | 2.9998  | 0.002702 | 0.020612 |
| COL6A6   | 12.90923 | 3.363068 | 1.21718 | 2.763   | 0.005727 | 0.03349  |
| COL9A1   | 8.482276 | 5.515367 | 2.07052 | 2.66376 | 0.007727 | 0.040286 |
| COLQ     | 5.652409 | 3.259286 | 1.04148 | 3.12947 | 0.001751 | 0.015547 |
| COPG2IT1 | 4.626632 | 4.043691 | 1.38404 | 2.92166 | 0.003482 | 0.024368 |
| CORO2A   | 46.55691 | 1.749161 | 0.54824 | 3.1905  | 0.00142  | 0.01357  |
| CORO2B   | 3.309567 | 5.091083 | 1.81313 | 2.80789 | 0.004987 | 0.030736 |
| COX1     | 41271.98 | 1.145635 | 0.26493 | 4.32428 | 1.53E-05 | 0.000526 |
| CP       | 10.44913 | 3.387855 | 0.85555 | 3.95985 | 7.50E-05 | 0.001804 |
| CPB2     | 3.090083 | 4.99087  | 1.81119 | 2.75557 | 0.005859 | 0.033969 |
| CPB2-AS1 | 3.382862 | 4.050748 | 1.48461 | 2.72849 | 0.006362 | 0.035753 |
| CPNE8    | 25.81432 | 1.10653  | 0.42348 | 2.61294 | 0.008977 | 0.044586 |
| CPO      | 8.682232 | 2.836013 | 0.92268 | 3.07369 | 0.002114 | 0.017583 |
| CPOX     | 20.50118 | 1.191726 | 0.34319 | 3.4725  | 0.000516 | 0.006964 |
| CPXM1    | 3.292883 | 2.243672 | 0.80817 | 2.77625 | 0.005499 | 0.032739 |
| CPXM2    | 219.4957 | 1.308385 | 0.32282 | 4.05305 | 5.06E-05 | 0.00131  |
| CR2      | 6.714991 | 5.144243 | 1.50902 | 3.40899 | 0.000652 | 0.008127 |
| CRACD    | 119.7302 | -1.76744 | 0.32152 | -5.4971 | 3.86E-08 | 4.28E-06 |
| CRB1     | 7.016352 | 5.672144 | 1.37758 | 4.11748 | 3.83E-05 | 0.001059 |
| CRH      | 2455.313 | 1.67924  | 0.43715 | 3.84132 | 0.000122 | 0.002556 |
| CRISP1   | 3.600069 | 4.651149 | 1.55156 | 2.99772 | 0.00272  | 0.020714 |
| CRISPLD2 | 21.9854  | 1.681854 | 0.29923 | 5.62054 | 1.90E-08 | 2.35E-06 |
| CRTAP    | 21.20485 | 1.33861  | 0.44718 | 2.99343 | 0.002759 | 0.020889 |
| CSHL1    | 7252.341 | -1.06234 | 0.2348  | -4.5245 | 6.05E-06 | 0.000259 |
| CSMD2    | 6.864019 | 4.016541 | 1.23012 | 3.26517 | 0.001094 | 0.011337 |
| CSMD3    | 28.26516 | 5.366845 | 1.25631 | 4.27189 | 1.94E-05 | 0.000629 |
| CST6     | 36.80876 | 1.979814 | 0.41016 | 4.82692 | 1.39E-06 | 8.01E-05 |
| CTCFL    | 2.575634 | 4.142612 | 1.47815 | 2.80256 | 0.00507  | 0.031077 |
| CTH      | 2.807843 | 3.751431 | 1.33113 | 2.81823 | 0.004829 | 0.030045 |
| CTIF     | 15.11501 | 1.29571  | 0.3154  | 4.10816 | 3.99E-05 | 0.001087 |
| CTNNA3   | 14.62931 | 3.195149 | 1.08667 | 2.94032 | 0.003279 | 0.023486 |
| CTNND2   | 9.142471 | 3.165498 | 1.00279 | 3.15669 | 0.001596 | 0.014634 |
| CTSC     | 23.17167 | 1.917618 | 0.55595 | 3.44927 | 0.000562 | 0.0074   |
| CTSD     | 262.9859 | 1.072823 | 0.25101 | 4.27403 | 1.92E-05 | 0.000626 |
| CTSV     | 5.028902 | 2.461348 | 0.809   | 3.04247 | 0.002346 | 0.018892 |
| CTTNBP2  | 8.900122 | 5.062282 | 1.32046 | 3.83372 | 0.000126 | 0.00261  |
| CTXN2    | 2.598127 | 3.624725 | 1.39365 | 2.60088 | 0.009299 | 0.045596 |
| CUBN     | 17.13048 | 5.03037  | 1.16721 | 4.30976 | 1.63E-05 | 0.000553 |
| CUEDC1   | 10.67649 | 1.045997 | 0.37519 | 2.78789 | 0.005305 | 0.031959 |
| CWH43    | 3.635078 | 4.681915 | 1.55246 | 3.01581 | 0.002563 | 0.019978 |
| CXADR    | 6.440938 | 4.08251  | 1.33168 | 3.06569 | 0.002172 | 0.017877 |

|           |          |          |         |         |          |          |
|-----------|----------|----------|---------|---------|----------|----------|
| CXCL10    | 15.10448 | 4.530342 | 1.62331 | 2.7908  | 0.005258 | 0.031765 |
| CXCL13    | 2.502874 | 3.576153 | 1.35387 | 2.64143 | 0.008256 | 0.041919 |
| CXCR2P1   | 19.07745 | 1.694659 | 0.54224 | 3.12531 | 0.001776 | 0.0157   |
| CXXC4     | 7.78344  | 3.774785 | 1.34956 | 2.79705 | 0.005157 | 0.03138  |
| CYBB      | 25.80338 | 1.371212 | 0.47506 | 2.88643 | 0.003896 | 0.026301 |
| CYBRD1    | 10.84313 | 2.580116 | 0.81065 | 3.18279 | 0.001459 | 0.013786 |
| CYLC2     | 7.575027 | 5.326268 | 1.60737 | 3.31366 | 0.000921 | 0.010059 |
| CYP2J2    | 28.80819 | 1.171869 | 0.30546 | 3.83638 | 0.000125 | 0.002591 |
| CYP3A5    | 5.395597 | 4.801055 | 1.54484 | 3.1078  | 0.001885 | 0.016286 |
| CYP4F11   | 2.634588 | 4.724682 | 1.7989  | 2.62643 | 0.008629 | 0.043309 |
| CYTH4     | 8.720185 | 1.616008 | 0.55079 | 2.93398 | 0.003346 | 0.023842 |
| CYYR1     | 12.98829 | 2.551238 | 0.75699 | 3.37025 | 0.000751 | 0.008843 |
| DAPK2     | 5.061283 | 3.516373 | 1.16322 | 3.02296 | 0.002503 | 0.019702 |
| DARS1-AS1 | 5.213694 | 2.127678 | 0.76643 | 2.77607 | 0.005502 | 0.032739 |
| DAZL      | 11.44108 | 1.910866 | 0.60278 | 3.17006 | 0.001524 | 0.014193 |
| DBF4      | 16.96534 | 1.194744 | 0.42422 | 2.81632 | 0.004858 | 0.030159 |
| DBF4B     | 7.966458 | 1.863559 | 0.55471 | 3.35953 | 0.000781 | 0.009107 |
| DCAF13P3  | 3.393363 | 4.017081 | 1.19887 | 3.35073 | 0.000806 | 0.009263 |
| DCC       | 9.973058 | 4.144518 | 1.34435 | 3.08293 | 0.00205  | 0.017144 |
| DCDC2     | 7.008835 | 2.811791 | 1.02007 | 2.75648 | 0.005843 | 0.033905 |
| DCHS2     | 10.02952 | 4.536239 | 1.34709 | 3.36743 | 0.000759 | 0.008908 |
| DCLK1     | 10.91502 | 3.025545 | 0.90145 | 3.3563  | 0.00079  | 0.009174 |
| DCN       | 40.48746 | 1.333172 | 0.4405  | 3.02648 | 0.002474 | 0.019522 |
| DDAH1     | 18.95645 | 1.315773 | 0.41998 | 3.13295 | 0.001731 | 0.015413 |
| DDIT4     | 18.85625 | 1.572291 | 0.38856 | 4.04642 | 5.20E-05 | 0.001341 |
| DDIT4L    | 24.45308 | 2.601455 | 0.5238  | 4.96655 | 6.82E-07 | 4.39E-05 |
| DDR2      | 32.46111 | 1.249912 | 0.41295 | 3.02676 | 0.002472 | 0.019522 |
| DDX11L10  | 5.216543 | 2.773004 | 0.85271 | 3.25199 | 0.001146 | 0.011697 |
| DDX4      | 4.409386 | 5.010683 | 1.46328 | 3.42429 | 0.000616 | 0.007816 |
| DELEC1    | 2.550901 | 4.155223 | 1.62638 | 2.5549  | 0.010622 | 0.049574 |
| DENND2A   | 15.78645 | 1.384628 | 0.43346 | 3.19438 | 0.001401 | 0.013453 |
| DEPDC1    | 9.743774 | 3.100252 | 0.99571 | 3.11361 | 0.001848 | 0.016047 |
| DEPP1     | 955.371  | -1.00014 | 0.16016 | -6.2447 | 4.25E-10 | 8.69E-08 |
| DEUP1     | 6.385184 | 5.562546 | 1.67752 | 3.31593 | 0.000913 | 0.010006 |
| DGKB      | 14.74927 | 4.178755 | 1.21283 | 3.44546 | 0.00057  | 0.007457 |
| DGKD      | 34.98655 | 1.14281  | 0.35508 | 3.21845 | 0.001289 | 0.012729 |
| DGKE      | 7.656745 | 2.481439 | 0.74333 | 3.33829 | 0.000843 | 0.009501 |
| DIAPH3    | 34.66646 | 1.475672 | 0.54677 | 2.69888 | 0.006957 | 0.037644 |
| DIO2      | 258.6338 | 4.674632 | 0.63124 | 7.40543 | 1.31E-13 | 7.05E-11 |
| DIPK2A    | 7.274361 | 1.894559 | 0.72176 | 2.62491 | 0.008667 | 0.043408 |
| DKK1      | 6.202404 | 2.015028 | 0.72085 | 2.79534 | 0.005185 | 0.031471 |
| DKK3      | 5.228432 | 1.634247 | 0.62146 | 2.62971 | 0.008546 | 0.042987 |
| DLC1      | 73.22413 | 1.282218 | 0.32366 | 3.96165 | 7.44E-05 | 0.001793 |
| DLG2      | 11.87315 | 2.9563   | 1.00985 | 2.92748 | 0.003417 | 0.024109 |

|            |          |          |         |         |          |          |
|------------|----------|----------|---------|---------|----------|----------|
| DLGAP1-AS5 | 3.196822 | 5.048074 | 1.95038 | 2.58825 | 0.009647 | 0.046596 |
| DLGAP5     | 6.770753 | 2.780899 | 0.89302 | 3.11402 | 0.001846 | 0.01604  |
| DLSTP1     | 3.979837 | 3.288329 | 1.19994 | 2.74041 | 0.006136 | 0.034932 |
| DMTN       | 22.78383 | 1.406852 | 0.51589 | 2.72706 | 0.00639  | 0.03581  |
| DNAAF11    | 5.283212 | 3.37996  | 1.27984 | 2.64093 | 0.008268 | 0.041967 |
| DNAAF9     | 8.168299 | 2.365869 | 0.80767 | 2.92925 | 0.003398 | 0.024009 |
| DNAH11     | 116.6455 | 1.231137 | 0.43896 | 2.80464 | 0.005037 | 0.030917 |
| DNAH12     | 19.83938 | 2.926691 | 0.87704 | 3.33703 | 0.000847 | 0.009519 |
| DNAH2      | 8.675409 | 3.966526 | 1.31867 | 3.00797 | 0.00263  | 0.020247 |
| DNAH5      | 24.20238 | 3.902821 | 1.17224 | 3.32938 | 0.00087  | 0.009689 |
| DNAH6      | 17.37316 | 2.132463 | 0.83002 | 2.56917 | 0.010194 | 0.048481 |
| DNAH7      | 21.89462 | 3.280863 | 0.86027 | 3.81376 | 0.000137 | 0.002766 |
| DNAH8      | 24.42053 | 3.781985 | 0.97896 | 3.86329 | 0.000112 | 0.002383 |
| DNAH9      | 11.03675 | 4.987899 | 1.40058 | 3.5613  | 0.000369 | 0.00555  |
| DNAI3      | 4.101464 | 3.404964 | 1.30168 | 2.61583 | 0.008901 | 0.044319 |
| DNAJA4     | 64.64305 | -1.10487 | 0.34399 | -3.2119 | 0.001319 | 0.012905 |
| DNAJB7     | 3.558899 | 4.659646 | 1.70093 | 2.73947 | 0.006154 | 0.034992 |
| DNAJB9     | 848.4424 | -1.03526 | 0.26876 | -3.852  | 0.000117 | 0.002467 |
| DNM1       | 2.300951 | 3.00423  | 1.17706 | 2.55231 | 0.010701 | 0.049757 |
| DNM3       | 34.82663 | 1.726429 | 0.50275 | 3.43396 | 0.000595 | 0.007647 |
| DNM3OS     | 7.854729 | 3.897147 | 1.18348 | 3.29297 | 0.000991 | 0.010586 |
| DOCK10     | 19.29557 | 2.575622 | 0.68854 | 3.74068 | 0.000184 | 0.003426 |
| DOCK2      | 17.90556 | 1.710481 | 0.59198 | 2.88942 | 0.003859 | 0.026185 |
| DOCK4      | 14.9558  | 2.447873 | 0.62442 | 3.92024 | 8.85E-05 | 0.002023 |
| DOK2       | 10.09551 | 1.989006 | 0.57719 | 3.44602 | 0.000569 | 0.007452 |
| DOK5       | 2.983041 | 3.834972 | 1.47176 | 2.6057  | 0.009169 | 0.045214 |
| DOK6       | 8.429319 | 3.764337 | 1.13809 | 3.30759 | 0.000941 | 0.010231 |
| DPF3       | 4.854036 | 4.644843 | 1.35436 | 3.42954 | 0.000605 | 0.007715 |
| DPP10      | 14.5665  | 2.620634 | 0.89532 | 2.92703 | 0.003422 | 0.024117 |
| DPP4       | 30.96124 | 1.767051 | 0.32926 | 5.36673 | 8.02E-08 | 8.00E-06 |
| DPP6       | 2.837505 | 3.706393 | 1.39095 | 2.66464 | 0.007707 | 0.040232 |
| DPY19L2    | 11.09534 | 1.812067 | 0.59491 | 3.04596 | 0.002319 | 0.018739 |
| DPY19L2P2  | 3.520193 | 4.622313 | 1.49461 | 3.09264 | 0.001984 | 0.016818 |
| DPYS       | 4.178842 | 3.885811 | 1.3825  | 2.81071 | 0.004943 | 0.030573 |
| DPYSL2     | 50.29789 | 1.389713 | 0.38038 | 3.65352 | 0.000259 | 0.004311 |
| DPYSL3     | 19.36642 | 2.013456 | 0.66751 | 3.01637 | 0.002558 | 0.019951 |
| DSC1       | 7.359656 | 3.024216 | 1.12042 | 2.69919 | 0.006951 | 0.037633 |
| DSEL-AS1   | 3.50928  | 5.186037 | 2.00316 | 2.58893 | 0.009628 | 0.046546 |
| DSG1       | 8.77498  | 3.901972 | 1.07754 | 3.62118 | 0.000293 | 0.004692 |
| DSG2-AS1   | 1.846092 | 4.103855 | 1.48722 | 2.75941 | 0.005791 | 0.033748 |
| DSG3       | 4.40739  | 5.541471 | 1.89071 | 2.93089 | 0.00338  | 0.023935 |
| DSG4       | 6.084998 | 5.99563  | 1.74429 | 3.43729 | 0.000588 | 0.00761  |
| DSPP       | 4.055273 | 5.370812 | 1.6453  | 3.26433 | 0.001097 | 0.01136  |
| DTHD1      | 5.123851 | 3.32657  | 1.17366 | 2.83435 | 0.004592 | 0.02909  |

|           |          |          |         |         |          |          |
|-----------|----------|----------|---------|---------|----------|----------|
| DTL       | 10.07487 | 2.699709 | 0.7574  | 3.56446 | 0.000365 | 0.005489 |
| DTNA      | 15.97272 | 3.567655 | 0.86472 | 4.12579 | 3.69E-05 | 0.001033 |
| DTWD2     | 18.17321 | 1.154135 | 0.39775 | 2.90162 | 0.003712 | 0.025453 |
| DUBR      | 185.6496 | -1.26231 | 0.29194 | -4.3239 | 1.53E-05 | 0.000526 |
| DUOXA1    | 2.96128  | 3.226099 | 1.18893 | 2.71344 | 0.006659 | 0.036679 |
| DVL1      | 185.9147 | 1.07072  | 0.23185 | 4.6181  | 3.87E-06 | 0.000178 |
| DYDC1     | 4.031571 | 5.408675 | 1.88366 | 2.87136 | 0.004087 | 0.027179 |
| DYNC1I1   | 14.5636  | 2.013452 | 0.72544 | 2.77549 | 0.005512 | 0.032749 |
| DYNC2H1   | 44.27169 | 2.434203 | 0.71623 | 3.39862 | 0.000677 | 0.00828  |
| DYNC2I1   | 300.7708 | 1.248706 | 0.25015 | 4.99193 | 5.98E-07 | 4.06E-05 |
| DYNLT5    | 2.583876 | 4.122068 | 1.51069 | 2.7286  | 0.00636  | 0.035753 |
| DZIP1     | 7.916537 | 1.883671 | 0.62349 | 3.02117 | 0.002518 | 0.01979  |
| DZIP1L    | 6.27508  | 5.021464 | 1.48533 | 3.3807  | 0.000723 | 0.00861  |
| E2F3      | 9.279109 | 1.739145 | 0.57638 | 3.01734 | 0.00255  | 0.019916 |
| E2F7      | 7.212702 | 5.203225 | 1.28438 | 4.05115 | 5.10E-05 | 0.001316 |
| EBF1      | 6.10809  | 2.063924 | 0.79568 | 2.59392 | 0.009489 | 0.046109 |
| ECE1      | 26.40481 | 2.016964 | 0.31673 | 6.36806 | 1.91E-10 | 4.76E-08 |
| EDIL3     | 7.320836 | 4.097886 | 1.41995 | 2.88594 | 0.003903 | 0.026321 |
| EDNRA     | 4.594826 | 3.375666 | 1.25731 | 2.68484 | 0.007256 | 0.038575 |
| EDNRB-AS1 | 3.559389 | 4.157647 | 1.52391 | 2.72827 | 0.006367 | 0.035764 |
| EEF2K     | 24.47679 | 1.278624 | 0.33378 | 3.8307  | 0.000128 | 0.002637 |
| EFCAB5    | 10.96456 | 3.58079  | 1.11812 | 3.20252 | 0.001362 | 0.013228 |
| EFNA5     | 6.89224  | 2.146713 | 0.8139  | 2.63758 | 0.00835  | 0.042225 |
| EGF       | 14.06133 | 2.543547 | 0.81197 | 3.13255 | 0.001733 | 0.015413 |
| EGFR-AS1  | 10.66489 | 1.762951 | 0.60145 | 2.93118 | 0.003377 | 0.023923 |
| EGLN3     | 51.30267 | 3.472306 | 0.42146 | 8.23869 | 1.74E-16 | 1.88E-13 |
| EHF       | 9.252328 | 2.136453 | 0.79127 | 2.70003 | 0.006933 | 0.037611 |
| EID1      | 370.867  | -1.04769 | 0.24154 | -4.3375 | 1.44E-05 | 0.000507 |
| EIF3C     | 31.32255 | -1.26327 | 0.34648 | -3.646  | 0.000266 | 0.004389 |
| EIF4EBP1  | 16.59903 | 1.639451 | 0.53629 | 3.05699 | 0.002236 | 0.018264 |
| ELAVL2    | 5.16322  | 4.231976 | 1.55894 | 2.71465 | 0.006635 | 0.036558 |
| ELAVL4    | 6.858515 | 4.645834 | 1.31193 | 3.54123 | 0.000398 | 0.005848 |
| ELMO3     | 43.89582 | 1.015324 | 0.25939 | 3.9143  | 9.07E-05 | 0.002067 |
| ELOVL6    | 6.362584 | 2.674349 | 1.02504 | 2.60902 | 0.00908  | 0.044976 |
| EMBP1     | 3.241894 | 2.943674 | 1.14814 | 2.56387 | 0.010351 | 0.04893  |
| EML5      | 15.08249 | 2.947436 | 1.04295 | 2.82607 | 0.004712 | 0.029575 |
| EML6      | 11.74307 | 3.150452 | 1.02845 | 3.06332 | 0.002189 | 0.017973 |
| EMP1      | 10.95536 | 1.713498 | 0.55534 | 3.08549 | 0.002032 | 0.01704  |
| EMP3      | 30.67821 | 1.467647 | 0.43075 | 3.40719 | 0.000656 | 0.00815  |
| EMX2OS    | 3.578604 | 2.949839 | 1.01531 | 2.90537 | 0.003668 | 0.025289 |
| ENAH      | 53.46677 | 1.241323 | 0.39374 | 3.15267 | 0.001618 | 0.014769 |
| ENAM      | 3.056956 | 4.408921 | 1.32075 | 3.3382  | 0.000843 | 0.009501 |
| ENC1      | 12.75802 | 1.769712 | 0.52779 | 3.35304 | 0.000799 | 0.009229 |
| ENG       | 729.0717 | 2.098167 | 0.21658 | 9.68781 | 3.40E-22 | 7.85E-19 |

|         |          |          |         |         |          |          |
|---------|----------|----------|---------|---------|----------|----------|
| ENKUR   | 10.44602 | 1.968413 | 0.6969  | 2.82451 | 0.004735 | 0.029677 |
| ENO4    | 6.849123 | 4.630346 | 1.38739 | 3.33744 | 0.000846 | 0.009513 |
| ENPP2   | 14.53178 | 1.661249 | 0.6173  | 2.69114 | 0.007121 | 0.038158 |
| ENPP3   | 5.524869 | 3.801023 | 1.2267  | 3.09857 | 0.001945 | 0.016607 |
| ENTHD1  | 4.997915 | 4.224156 | 1.50491 | 2.80691 | 0.005002 | 0.030788 |
| ENTPD5  | 20.32028 | 1.118251 | 0.35414 | 3.15766 | 0.00159  | 0.014623 |
| EPGN    | 6.094316 | 4.265051 | 1.36682 | 3.12041 | 0.001806 | 0.015825 |
| EPHA3   | 7.454402 | 3.426072 | 1.20237 | 2.84944 | 0.00438  | 0.028288 |
| EPHA4   | 8.11622  | 4.413581 | 1.40299 | 3.14585 | 0.001656 | 0.014982 |
| EPHA5   | 19.38234 | 5.58443  | 1.77391 | 3.14808 | 0.001643 | 0.014944 |
| EPHA6   | 11.55211 | 5.52883  | 2.14134 | 2.58195 | 0.009824 | 0.04717  |
| EPHB1   | 4.627378 | 3.346427 | 1.31252 | 2.54963 | 0.010784 | 0.049983 |
| ERBB4   | 21.53229 | 2.932423 | 0.67828 | 4.32334 | 1.54E-05 | 0.000526 |
| EREG    | 5.230684 | 4.22836  | 1.39073 | 3.04039 | 0.002363 | 0.018994 |
| ERGIC1  | 438.2953 | 1.135932 | 0.22575 | 5.03184 | 4.86E-07 | 3.52E-05 |
| ERICH3  | 17.84242 | 4.443028 | 1.1361  | 3.91079 | 9.20E-05 | 0.002088 |
| ERICH5  | 59.71107 | -1.40307 | 0.42574 | -3.2956 | 0.000982 | 0.010508 |
| ERMN    | 4.870578 | 4.618512 | 1.49659 | 3.08603 | 0.002028 | 0.017021 |
| ERO1A   | 229.8484 | 1.206861 | 0.24222 | 4.98247 | 6.28E-07 | 4.18E-05 |
| ERV3-1  | 287.7405 | -1.07788 | 0.3198  | -3.3705 | 0.00075  | 0.008843 |
| ESCO2   | 5.634901 | 3.002075 | 1.11125 | 2.70152 | 0.006902 | 0.037572 |
| ESPL1   | 2.795737 | 3.245203 | 1.13431 | 2.86096 | 0.004224 | 0.027744 |
| ESR1    | 9.282391 | 1.409282 | 0.54255 | 2.59754 | 0.00939  | 0.045861 |
| ESYT1   | 32.03095 | 1.826512 | 0.2623  | 6.96334 | 3.32E-12 | 1.38E-09 |
| ETNPPL  | 2.933701 | 4.879342 | 1.28803 | 3.78823 | 0.000152 | 0.002991 |
| ETS1    | 44.33745 | 1.56667  | 0.49012 | 3.19649 | 0.001391 | 0.013395 |
| ETV1    | 10.7624  | 4.97269  | 1.29676 | 3.8347  | 0.000126 | 0.002602 |
| EVC     | 7.903738 | 2.501631 | 0.8904  | 2.80955 | 0.004961 | 0.030648 |
| EVC2    | 5.597888 | 2.956927 | 0.83314 | 3.54914 | 0.000386 | 0.005738 |
| EXT1    | 38.17605 | 1.103491 | 0.31788 | 3.47139 | 0.000518 | 0.006982 |
| EXTL3   | 12.84218 | 1.148546 | 0.38164 | 3.00954 | 0.002616 | 0.020187 |
| EYA1    | 9.392966 | 3.435319 | 1.08797 | 3.15755 | 0.001591 | 0.014623 |
| EYA2    | 4.570929 | 2.468462 | 0.86629 | 2.84947 | 0.004379 | 0.028288 |
| EYS     | 16.84134 | 2.373517 | 0.87896 | 2.70037 | 0.006926 | 0.037605 |
| F13B    | 4.227122 | 3.837724 | 1.46931 | 2.61192 | 0.009003 | 0.044705 |
| F2R     | 9.794902 | 1.502532 | 0.57961 | 2.59233 | 0.009533 | 0.046184 |
| F8      | 10.25334 | 1.429401 | 0.51598 | 2.77027 | 0.005601 | 0.033059 |
| FABP5   | 5.726979 | 1.787494 | 0.66461 | 2.68955 | 0.007155 | 0.038276 |
| FABP7   | 4.262136 | 3.890996 | 1.45829 | 2.6682  | 0.007626 | 0.039973 |
| FAM110A | 32.53833 | 1.007991 | 0.2861  | 3.52322 | 0.000426 | 0.006121 |
| FAM131B | 3.92604  | 4.287599 | 1.182   | 3.62742 | 0.000286 | 0.004647 |
| FAM171B | 635.2447 | -1.02532 | 0.2048  | -5.0066 | 5.54E-07 | 3.81E-05 |
| FAM177B | 4.932238 | 4.18004  | 1.50839 | 2.77119 | 0.005585 | 0.033003 |
| FAM184A | 144.0229 | 1.229094 | 0.25537 | 4.813   | 1.49E-06 | 8.35E-05 |

|           |          |          |         |         |          |          |
|-----------|----------|----------|---------|---------|----------|----------|
| FAM222A   | 3.415967 | 2.721366 | 0.84993 | 3.20188 | 0.001365 | 0.013249 |
| FAM227B   | 13.18466 | 2.835458 | 0.92837 | 3.05423 | 0.002256 | 0.018383 |
| FAM229B   | 3.903841 | 4.285171 | 1.29184 | 3.31712 | 0.00091  | 0.009976 |
| FAM53B    | 41.25671 | 1.201597 | 0.30891 | 3.88982 | 0.0001   | 0.00219  |
| FAM78A    | 11.21044 | 1.720041 | 0.6389  | 2.69219 | 0.007098 | 0.038134 |
| FANCI     | 22.6799  | 1.751216 | 0.44328 | 3.95056 | 7.80E-05 | 0.001843 |
| FANK1     | 19.72872 | 1.321147 | 0.34142 | 3.86955 | 0.000109 | 0.002338 |
| FAR1      | 26.19428 | 1.012151 | 0.35669 | 2.83759 | 0.004546 | 0.028985 |
| FAS       | 7.608428 | 3.012329 | 1.00565 | 2.99539 | 0.002741 | 0.020824 |
| FAT3      | 9.795956 | 2.937711 | 0.88833 | 3.307   | 0.000943 | 0.010239 |
| FAT4      | 20.61028 | 2.851722 | 0.85427 | 3.33822 | 0.000843 | 0.009501 |
| FBXO43    | 3.068973 | 3.961384 | 1.52472 | 2.59811 | 0.009374 | 0.045826 |
| FBXO5     | 27.56846 | -1.05376 | 0.26668 | -3.9514 | 7.77E-05 | 0.001843 |
| FCER1G    | 11.06733 | 1.62526  | 0.51403 | 3.16181 | 0.001568 | 0.014485 |
| FCGR3A    | 18.91757 | 1.763105 | 0.65151 | 2.70616 | 0.006807 | 0.037201 |
| FCHO1     | 6.532729 | 2.440026 | 0.71435 | 3.41575 | 0.000636 | 0.008012 |
| FCMR      | 5.244408 | 1.837402 | 0.67019 | 2.74162 | 0.006114 | 0.034837 |
| FCRL1     | 4.847434 | 4.640446 | 1.32607 | 3.4994  | 0.000466 | 0.006482 |
| FCRL2     | 4.479951 | 5.02266  | 1.62542 | 3.09007 | 0.002001 | 0.01692  |
| FCRL5     | 2.360981 | 4.011128 | 1.45214 | 2.76222 | 0.005741 | 0.033531 |
| FCRLB     | 3.445919 | 2.211716 | 0.77384 | 2.8581  | 0.004262 | 0.027854 |
| FERMT1    | 12.02304 | 2.141859 | 0.79605 | 2.6906  | 0.007132 | 0.038207 |
| FGF14     | 4.373722 | 3.176039 | 1.18116 | 2.68891 | 0.007169 | 0.038322 |
| FGF14-IT1 | 4.818352 | 4.635734 | 1.67925 | 2.76061 | 0.005769 | 0.033649 |
| FGF23     | 4.647635 | 3.991769 | 1.47655 | 2.70345 | 0.006862 | 0.037393 |
| FGF5      | 3.652803 | 5.257224 | 1.91289 | 2.74831 | 0.00599  | 0.034428 |
| FGF7      | 7.573446 | 3.273689 | 0.97632 | 3.35309 | 0.000799 | 0.009229 |
| FGFR1     | 25.88386 | 1.267957 | 0.34302 | 3.6965  | 0.000219 | 0.003845 |
| FGGY      | 31.92696 | 1.129202 | 0.28346 | 3.98358 | 6.79E-05 | 0.001673 |
| FHAD1     | 2.858564 | 4.342787 | 1.62437 | 2.67351 | 0.007506 | 0.039567 |
| FHL2      | 135.0662 | 1.008951 | 0.23576 | 4.27957 | 1.87E-05 | 0.000614 |
| FHL5      | 5.15526  | 3.333735 | 0.97912 | 3.40484 | 0.000662 | 0.008186 |
| FILIP1    | 9.989195 | 2.964651 | 0.81521 | 3.63667 | 0.000276 | 0.004519 |
| FKBP5     | 14.22509 | 1.950577 | 0.54398 | 3.58576 | 0.000336 | 0.005185 |
| FLG2      | 4.923687 | 3.786788 | 1.36904 | 2.76602 | 0.005674 | 0.033351 |
| FLG-AS1   | 3.297688 | 2.997322 | 1.09732 | 2.7315  | 0.006305 | 0.035552 |
| FLJ46284  | 4.194198 | 4.936149 | 1.85701 | 2.65811 | 0.007858 | 0.040796 |
| FLNA      | 204.5374 | 1.361495 | 0.34265 | 3.97339 | 7.09E-05 | 0.001728 |
| FLNB      | 244.1072 | 1.930624 | 0.20715 | 9.31984 | 1.17E-20 | 2.35E-17 |
| FLT1      | 6013.279 | 3.071992 | 0.28287 | 10.8601 | 1.78E-27 | 7.21E-24 |
| FMO1      | 2.533398 | 4.713763 | 1.75328 | 2.68854 | 0.007177 | 0.038325 |
| FMO9P     | 3.095158 | 5.005898 | 1.92624 | 2.59879 | 0.009355 | 0.045768 |
| FN1       | 2594.044 | 1.652523 | 0.2121  | 7.79113 | 6.64E-15 | 5.37E-12 |
| FOLH1     | 8.089883 | 3.751306 | 1.17464 | 3.19358 | 0.001405 | 0.013483 |

|         |          |          |         |         |          |          |
|---------|----------|----------|---------|---------|----------|----------|
| FOLH1B  | 5.35787  | 4.326864 | 1.52477 | 2.83771 | 0.004544 | 0.028985 |
| FOLR1   | 64.72161 | -1.01383 | 0.30182 | -3.359  | 0.000782 | 0.009112 |
| FPGS    | 13.27364 | 1.664209 | 0.46143 | 3.60665 | 0.00031  | 0.004892 |
| FPR3    | 5.812207 | 2.666854 | 0.84163 | 3.16867 | 0.001531 | 0.014221 |
| FREM1   | 14.31978 | 5.762693 | 1.32493 | 4.34943 | 1.36E-05 | 0.000488 |
| FREM2   | 18.23772 | 2.540209 | 0.68646 | 3.70046 | 0.000215 | 0.003811 |
| FRMD3   | 14.56811 | 1.568137 | 0.55325 | 2.83439 | 0.004591 | 0.02909  |
| FRMD4A  | 78.31831 | 1.969652 | 0.25362 | 7.7662  | 8.09E-15 | 5.94E-12 |
| FRRS1   | 13.45096 | 1.445527 | 0.47856 | 3.0206  | 0.002523 | 0.019818 |
| FRZB    | 595.8459 | -1.65351 | 0.33867 | -4.8824 | 1.05E-06 | 6.37E-05 |
| FSD1L   | 8.762775 | 3.185885 | 1.01543 | 3.13747 | 0.001704 | 0.015272 |
| FSD2    | 3.365585 | 4.570079 | 1.6636  | 2.74711 | 0.006012 | 0.034488 |
| FSHR    | 3.372827 | 5.126925 | 1.65327 | 3.10109 | 0.001928 | 0.01651  |
| FSIP2   | 27.12892 | 1.987662 | 0.6834  | 2.90847 | 0.003632 | 0.025156 |
| FSTL3   | 1059.991 | 4.978037 | 0.63496 | 7.83988 | 4.51E-15 | 3.84E-12 |
| FTH1    | 1248.719 | 1.502903 | 0.28142 | 5.34037 | 9.28E-08 | 9.04E-06 |
| FTSJ1   | 8.651982 | 1.476715 | 0.52094 | 2.83473 | 0.004587 | 0.02909  |
| FUT9    | 7.506996 | 2.629867 | 1.02041 | 2.57727 | 0.009959 | 0.047591 |
| FXYD3   | 292.7858 | -1.18196 | 0.35502 | -3.3292 | 0.000871 | 0.009689 |
| FYN     | 22.04016 | 1.377184 | 0.42485 | 3.24155 | 0.001189 | 0.01199  |
| FZD3    | 27.55555 | 1.49796  | 0.57239 | 2.61702 | 0.00887  | 0.04422  |
| FZD5    | 10.01171 | 1.33322  | 0.4795  | 2.78045 | 0.005428 | 0.032492 |
| GABRA1  | 5.465315 | 5.319562 | 1.56068 | 3.40848 | 0.000653 | 0.008127 |
| GABRB2  | 8.963195 | 5.120823 | 1.61224 | 3.17623 | 0.001492 | 0.013992 |
| GABRG1  | 10.22365 | 5.766944 | 1.45104 | 3.97436 | 7.06E-05 | 0.001724 |
| GABRG2  | 4.23998  | 4.930526 | 1.40025 | 3.52118 | 0.00043  | 0.006158 |
| GABRP   | 3.8077   | 4.262979 | 1.15024 | 3.70617 | 0.00021  | 0.003742 |
| GABRR1  | 29.96968 | -1.08161 | 0.33397 | -3.2386 | 0.001201 | 0.012068 |
| GAD2    | 4.106888 | 4.897808 | 1.8309  | 2.67508 | 0.007471 | 0.039451 |
| GALK1   | 24.59825 | 1.098947 | 0.36397 | 3.0193  | 0.002534 | 0.019855 |
| GALNT13 | 10.24772 | 3.764477 | 1.08602 | 3.46631 | 0.000528 | 0.00705  |
| GALNT15 | 6.229543 | 1.83687  | 0.60409 | 3.04072 | 0.00236  | 0.018983 |
| GALNT18 | 11.72154 | 1.91084  | 0.74412 | 2.56792 | 0.010231 | 0.048534 |
| GALNT6  | 18.04335 | 1.100707 | 0.36104 | 3.04867 | 0.002299 | 0.018617 |
| GAPDH   | 3065.774 | 3.261959 | 0.28898 | 11.2879 | 1.51E-29 | 1.22E-25 |
| GARNL3  | 8.134765 | 1.929859 | 0.6778  | 2.84722 | 0.00441  | 0.028441 |
| GAS2    | 9.194128 | 3.966565 | 1.47053 | 2.69737 | 0.006989 | 0.037739 |
| GAS5    | 85.02489 | 1.196944 | 0.19992 | 5.98719 | 2.13E-09 | 3.71E-07 |
| GASK1B  | 7.104422 | 1.644175 | 0.56578 | 2.90605 | 0.00366  | 0.025256 |
| GBAP1   | 3.32055  | 2.657195 | 1.01616 | 2.61495 | 0.008924 | 0.044389 |
| GBGT1   | 55.88299 | 1.339489 | 0.33329 | 4.01901 | 5.84E-05 | 0.001474 |
| GBP1    | 81.4732  | 1.480384 | 0.27193 | 5.44401 | 5.21E-08 | 5.50E-06 |
| GBP4    | 30.15013 | 2.141379 | 0.69821 | 3.06695 | 0.002163 | 0.01782  |
| GBP5    | 17.3633  | 3.157461 | 0.82153 | 3.84338 | 0.000121 | 0.002538 |



|            |          |          |         |         |          |          |
|------------|----------|----------|---------|---------|----------|----------|
| GC         | 2.427991 | 4.636134 | 1.69083 | 2.74193 | 0.006108 | 0.034837 |
| GCLM       | 217.1623 | -1.04211 | 0.2272  | -4.5868 | 4.50E-06 | 0.000201 |
| GCNT2      | 18.281   | 1.546494 | 0.58236 | 2.65558 | 0.007917 | 0.040963 |
| GDF11      | 4.698917 | 4.542163 | 1.21207 | 3.74746 | 0.000179 | 0.00337  |
| GDNF-AS1   | 4.733653 | 4.62661  | 1.66503 | 2.77869 | 0.005458 | 0.032572 |
| GFOD1      | 15.97401 | 2.710635 | 0.60497 | 4.48062 | 7.44E-06 | 0.000307 |
| GH1        | 22.43087 | -3.50627 | 0.88264 | -3.9725 | 7.11E-05 | 0.001732 |
| GIMAP1     | 7.417505 | 2.055395 | 0.74391 | 2.76297 | 0.005728 | 0.03349  |
| GIMAP4     | 18.96678 | 2.278114 | 0.5842  | 3.89952 | 9.64E-05 | 0.002152 |
| GIMAP7     | 9.947236 | 2.161853 | 0.73459 | 2.94295 | 0.003251 | 0.023363 |
| GIN51      | 8.232621 | 2.471237 | 0.6859  | 3.60289 | 0.000315 | 0.004949 |
| GLRA3      | 6.86559  | 4.165303 | 1.47658 | 2.8209  | 0.004789 | 0.029916 |
| GLRB       | 3.750025 | 4.747499 | 1.62278 | 2.92553 | 0.003439 | 0.024189 |
| GLT1D1     | 4.192045 | 2.875996 | 1.12582 | 2.55458 | 0.010632 | 0.049588 |
| GLT8D2     | 3.673016 | 2.243617 | 0.87942 | 2.55124 | 0.010734 | 0.049868 |
| GLYATL1    | 3.67376  | 4.685807 | 1.54131 | 3.04014 | 0.002365 | 0.019001 |
| GLYATL3    | 3.952386 | 3.736056 | 1.44006 | 2.59437 | 0.009477 | 0.046085 |
| GMDS       | 14.28926 | 1.011741 | 0.39387 | 2.56874 | 0.010207 | 0.048502 |
| GML        | 1.449508 | 3.948196 | 1.5028  | 2.62723 | 0.008608 | 0.043242 |
| GNA12      | 97.42583 | 1.181079 | 0.27178 | 4.34575 | 1.39E-05 | 0.000493 |
| GNAL       | 4.251577 | 2.590374 | 1.00454 | 2.57867 | 0.009918 | 0.047427 |
| GNB4       | 43.49711 | 1.19403  | 0.4009  | 2.97834 | 0.002898 | 0.021642 |
| GNG2       | 15.72896 | 2.013343 | 0.68127 | 2.95526 | 0.003124 | 0.022781 |
| GPLY       | 14.01959 | 2.771119 | 0.6382  | 4.34207 | 1.41E-05 | 0.0005   |
| GNRHR      | 3.652225 | 5.242412 | 2.02092 | 2.59407 | 0.009485 | 0.046103 |
| GOLGA2P6   | 2.850696 | 4.813914 | 1.64774 | 2.92152 | 0.003483 | 0.024368 |
| GOLGA6L2   | 3.834716 | 4.792549 | 1.6208  | 2.9569  | 0.003107 | 0.022703 |
| GPAM       | 10.54784 | 1.473453 | 0.50469 | 2.91953 | 0.003506 | 0.024503 |
| GPC4       | 26.28492 | 1.645749 | 0.48948 | 3.36227 | 0.000773 | 0.009037 |
| GPC5       | 12.1409  | 3.543162 | 1.04986 | 3.37488 | 0.000738 | 0.008753 |
| GPM6A      | 6.802018 | 4.123532 | 1.25477 | 3.28627 | 0.001015 | 0.01076  |
| GPR157     | 226.5967 | 1.338257 | 0.26652 | 5.02131 | 5.13E-07 | 3.62E-05 |
| GPR17      | 2.503221 | 3.257842 | 1.04841 | 3.10742 | 0.001887 | 0.01629  |
| GPR21      | 10.947   | 3.132702 | 0.9876  | 3.17203 | 0.001514 | 0.014146 |
| GPR32      | 2.724582 | 3.678338 | 1.07837 | 3.41103 | 0.000647 | 0.008116 |
| GPR85      | 2.875844 | 4.375076 | 1.58902 | 2.75331 | 0.0059   | 0.034087 |
| GPRC5D-AS1 | 60.54943 | -1.03865 | 0.23039 | -4.5081 | 6.54E-06 | 0.000276 |
| GPRIN2     | 5.081007 | 4.659045 | 1.42098 | 3.27875 | 0.001043 | 0.010953 |
| GPRIN3     | 14.17173 | 3.167811 | 0.85193 | 3.71838 | 0.000201 | 0.003626 |
| GPT2       | 55.71807 | 1.394221 | 0.29994 | 4.64833 | 3.35E-06 | 0.000158 |
| GPX3       | 135.0359 | 2.195919 | 0.31582 | 6.953   | 3.58E-12 | 1.41E-09 |
| GRAP       | 5.841067 | 1.931293 | 0.69847 | 2.76505 | 0.005691 | 0.033387 |
| GRB14      | 33.12811 | 1.151266 | 0.29178 | 3.9457  | 7.96E-05 | 0.001872 |
| GREB1      | 7.185938 | 3.418822 | 0.95696 | 3.57257 | 0.000353 | 0.005366 |

|           |          |          |         |         |          |          |
|-----------|----------|----------|---------|---------|----------|----------|
| GRHL3     | 9.608464 | 1.277475 | 0.46923 | 2.7225  | 0.006479 | 0.036069 |
| GRIA1     | 7.723952 | 3.859198 | 1.2618  | 3.05849 | 0.002225 | 0.01821  |
| GRIA2     | 11.19284 | 4.953973 | 1.40927 | 3.51529 | 0.000439 | 0.006246 |
| GRIA3     | 3.297493 | 4.568905 | 1.61602 | 2.82726 | 0.004695 | 0.029556 |
| GRID2     | 8.673002 | 3.738417 | 1.23589 | 3.02487 | 0.002487 | 0.019597 |
| GRIK1     | 3.521368 | 3.173854 | 1.17641 | 2.69792 | 0.006977 | 0.037707 |
| GRIN2A    | 10.05159 | 5.17977  | 1.41638 | 3.65704 | 0.000255 | 0.004275 |
| GRIN2B    | 24.89666 | 4.126018 | 1.24262 | 3.32042 | 0.000899 | 0.009912 |
| GRIN3A    | 7.189129 | 3.441128 | 1.24889 | 2.75535 | 0.005863 | 0.033973 |
| GRM3      | 4.544334 | 4.528183 | 1.5966  | 2.83615 | 0.004566 | 0.029045 |
| GRM5      | 7.413575 | 3.577747 | 1.33065 | 2.68871 | 0.007173 | 0.038322 |
| GRM5P1    | 2.705507 | 4.218813 | 1.4451  | 2.91939 | 0.003507 | 0.024503 |
| GRM8      | 8.693057 | 3.494158 | 0.99054 | 3.52752 | 0.000419 | 0.006063 |
| GSAP      | 63.61118 | 1.06758  | 0.28966 | 3.68565 | 0.000228 | 0.003957 |
| GSDMC     | 4.19289  | 4.402136 | 1.47775 | 2.97895 | 0.002892 | 0.021608 |
| GSTA3     | 276.767  | -1.3245  | 0.26469 | -5.004  | 5.62E-07 | 3.84E-05 |
| GTSE1     | 4.802129 | 3.588711 | 0.9243  | 3.88263 | 0.000103 | 0.002239 |
| GUCY1A2   | 26.65364 | 1.889061 | 0.70781 | 2.66888 | 0.00761  | 0.039922 |
| GUCY2EP   | 4.53273  | 4.007611 | 1.07674 | 3.72197 | 0.000198 | 0.003588 |
| GYPB      | 5.11152  | 3.422641 | 1.1072  | 3.09126 | 0.001993 | 0.01687  |
| H1-5      | 14.28542 | 1.503063 | 0.44912 | 3.3467  | 0.000818 | 0.009357 |
| H3C2      | 14.20294 | 1.534904 | 0.57825 | 2.65441 | 0.007945 | 0.041075 |
| H4C1      | 3.664647 | 1.763927 | 0.68133 | 2.58895 | 0.009627 | 0.046546 |
| HAS2      | 3.577942 | 5.186734 | 1.47622 | 3.51352 | 0.000442 | 0.00626  |
| HCAR1     | 2.174662 | 3.0363   | 1.15047 | 2.63919 | 0.00831  | 0.042098 |
| HCN1      | 7.957561 | 3.677695 | 1.19692 | 3.07262 | 0.002122 | 0.017637 |
| HDAC9     | 30.64232 | 1.896499 | 0.59097 | 3.20914 | 0.001331 | 0.013005 |
| HDX       | 6.969575 | 4.095554 | 1.39903 | 2.92742 | 0.003418 | 0.024109 |
| HECW1     | 5.233125 | 4.766954 | 1.49648 | 3.18544 | 0.001445 | 0.013697 |
| HELZ2     | 8.539948 | 1.786079 | 0.56948 | 3.13632 | 0.001711 | 0.01529  |
| HERC3     | 38.65501 | 1.430785 | 0.44831 | 3.1915  | 0.001415 | 0.013555 |
| HEY1      | 63.70949 | 1.305834 | 0.30389 | 4.2971  | 1.73E-05 | 0.000579 |
| HFE       | 13.12337 | 1.659731 | 0.38899 | 4.26677 | 1.98E-05 | 0.000639 |
| HIP1      | 16.88519 | 1.49252  | 0.55797 | 2.6749  | 0.007475 | 0.039455 |
| HK2       | 116.757  | 2.875066 | 0.4903  | 5.86385 | 4.52E-09 | 6.59E-07 |
| HLA-A     | 11.12855 | 2.588241 | 0.98358 | 2.63146 | 0.008502 | 0.042806 |
| HLF       | 859.9394 | -1.31524 | 0.25239 | -5.2112 | 1.88E-07 | 1.60E-05 |
| HLTF      | 17.52922 | 2.524849 | 0.59819 | 4.22083 | 2.43E-05 | 0.000748 |
| HMCN1     | 27.69698 | 2.657325 | 0.82733 | 3.21194 | 0.001318 | 0.012905 |
| HMGA2     | 2.723156 | 4.175875 | 1.36745 | 3.05377 | 0.00226  | 0.018387 |
| HMGA2-AS1 | 6.095404 | 5.489942 | 1.6411  | 3.34527 | 0.000822 | 0.009388 |
| HNF4G     | 7.88619  | 3.206353 | 1.15746 | 2.77016 | 0.005603 | 0.033059 |
| HNRNPA3P1 | 2.749219 | 3.713708 | 1.39987 | 2.65289 | 0.007981 | 0.041181 |
| HOXB3     | 7.823457 | 4.596696 | 1.46741 | 3.13252 | 0.001733 | 0.015413 |

|           |          |          |         |         |          |          |
|-----------|----------|----------|---------|---------|----------|----------|
| HPCAL1    | 549.4147 | 1.298212 | 0.32578 | 3.9849  | 6.75E-05 | 0.001669 |
| HPSE2     | 6.779583 | 5.144663 | 1.40584 | 3.65951 | 0.000253 | 0.004247 |
| HS6ST1    | 23.35621 | 1.062064 | 0.29258 | 3.62995 | 0.000283 | 0.004611 |
| HS6ST3    | 9.050199 | 4.370867 | 1.23424 | 3.54133 | 0.000398 | 0.005848 |
| HSD3BP4   | 6.917823 | 1.750443 | 0.65696 | 2.66447 | 0.007711 | 0.04024  |
| HSPA2     | 74.50248 | 1.35697  | 0.16411 | 8.2688  | 1.35E-16 | 1.59E-13 |
| HSPG2     | 140.6227 | 1.099084 | 0.18779 | 5.85282 | 4.83E-09 | 6.91E-07 |
| HTR1A     | 3.819273 | 4.262692 | 1.60724 | 2.65218 | 0.007998 | 0.041203 |
| HTR1F     | 5.512796 | 3.758784 | 1.38544 | 2.71307 | 0.006666 | 0.036696 |
| HTR2A     | 3.382979 | 4.037266 | 1.28618 | 3.13897 | 0.001695 | 0.015236 |
| HTR2C     | 2.061881 | 4.34264  | 1.59779 | 2.7179  | 0.00657  | 0.036312 |
| HTRA1     | 3893.187 | 1.695119 | 0.21862 | 7.75369 | 8.93E-15 | 6.27E-12 |
| HTRA4     | 423.7306 | 4.232474 | 0.38547 | 10.9801 | 4.76E-28 | 2.57E-24 |
| HUNK      | 9.331799 | 1.909826 | 0.59133 | 3.22974 | 0.001239 | 0.01238  |
| HYDIN     | 10.28463 | 2.369746 | 0.86544 | 2.73821 | 0.006178 | 0.035085 |
| HYDIN2    | 4.477459 | 3.247829 | 1.1604  | 2.79889 | 0.005128 | 0.031272 |
| HYMAI     | 3.246609 | 3.921479 | 1.35694 | 2.88994 | 0.003853 | 0.026185 |
| IAPP      | 4.453385 | 4.520814 | 1.68529 | 2.68251 | 0.007307 | 0.038809 |
| ICOS      | 6.296699 | 5.015758 | 1.33063 | 3.76946 | 0.000164 | 0.00316  |
| IDH1      | 101.8145 | -1.85279 | 0.35702 | -5.1896 | 2.11E-07 | 1.72E-05 |
| IFI16     | 16.5905  | 1.622427 | 0.54439 | 2.98025 | 0.00288  | 0.021547 |
| IFI44     | 7.144509 | 2.530206 | 0.79343 | 3.18896 | 0.001428 | 0.013603 |
| IFI44L    | 26.50697 | 2.826671 | 0.58254 | 4.85233 | 1.22E-06 | 7.20E-05 |
| IFIT1     | 11.67811 | 2.550655 | 0.53749 | 4.74549 | 2.08E-06 | 0.00011  |
| IFIT3     | 18.02606 | 2.132367 | 0.48257 | 4.41877 | 9.93E-06 | 0.000381 |
| IFITM2    | 66.52956 | -1.68399 | 0.27598 | -6.1018 | 1.05E-09 | 1.90E-07 |
| IFITM3    | 170.6223 | -1.29012 | 0.28641 | -4.5045 | 6.65E-06 | 0.00028  |
| IFT172    | 6.430457 | 2.899875 | 1.02581 | 2.8269  | 0.0047   | 0.029558 |
| IGDCC3    | 8.61008  | 1.130406 | 0.4176  | 2.70688 | 0.006792 | 0.037146 |
| IGF1      | 14.50734 | 2.032856 | 0.64008 | 3.17593 | 0.001494 | 0.013998 |
| IGF2      | 196.6819 | 2.432283 | 0.34495 | 7.05112 | 1.77E-12 | 7.55E-10 |
| IGF2BP1   | 7.88694  | 3.026238 | 0.92833 | 3.25988 | 0.001115 | 0.011485 |
| IGFBP3    | 101.6625 | 2.401516 | 0.41094 | 5.84389 | 5.10E-09 | 7.17E-07 |
| IGFBP4    | 34.7611  | 1.347549 | 0.37438 | 3.59941 | 0.000319 | 0.004992 |
| IGFBP5    | 38.37669 | 1.362738 | 0.42321 | 3.21997 | 0.001282 | 0.012703 |
| IGFL2     | 3.257238 | 4.063327 | 1.37274 | 2.96001 | 0.003076 | 0.022555 |
| IGFL2-AS1 | 34.80703 | 2.099123 | 0.51693 | 4.06075 | 4.89E-05 | 0.00128  |
| IGHA1     | 18.78782 | -1.89038 | 0.61897 | -3.0541 | 0.002257 | 0.018383 |
| IGSF1     | 3.613903 | 2.866388 | 1.07413 | 2.66856 | 0.007618 | 0.039947 |
| IGSF8     | 41.82189 | 1.856941 | 0.37877 | 4.90253 | 9.46E-07 | 5.83E-05 |
| IKZF3     | 34.98379 | 1.831124 | 0.56958 | 3.21489 | 0.001305 | 0.012833 |
| IL10RA    | 11.14246 | 2.209489 | 0.80973 | 2.72868 | 0.006359 | 0.035753 |
| IL16      | 11.99378 | 2.276487 | 0.63833 | 3.56633 | 0.000362 | 0.00546  |
| IL18R1    | 5.88619  | 3.185189 | 1.22274 | 2.60495 | 0.009189 | 0.045251 |

|           |          |          |         |         |          |          |
|-----------|----------|----------|---------|---------|----------|----------|
| IL1RL1    | 8.539424 | 2.033497 | 0.73368 | 2.77163 | 0.005578 | 0.032983 |
| IL2RB     | 73.65029 | 1.226245 | 0.31266 | 3.92199 | 8.78E-05 | 0.002011 |
| IL32      | 24.131   | 1.478739 | 0.53075 | 2.78613 | 0.005334 | 0.032082 |
| IL7       | 16.10301 | 5.273759 | 1.25561 | 4.20014 | 2.67E-05 | 0.000797 |
| INHA      | 364.4699 | 1.906608 | 0.21356 | 8.92754 | 4.36E-19 | 5.87E-16 |
| INHBA     | 1480.171 | 1.601506 | 0.2225  | 7.1979  | 6.11E-13 | 2.75E-10 |
| INHBA-AS1 | 24.54074 | 1.436883 | 0.34036 | 4.22164 | 2.43E-05 | 0.000747 |
| INPP4B    | 22.36211 | 1.410329 | 0.53216 | 2.65022 | 0.008044 | 0.04135  |
| INSC      | 4.683167 | 5.60013  | 1.77955 | 3.14694 | 0.00165  | 0.01496  |
| INTU      | 10.00953 | 2.178853 | 0.81358 | 2.67809 | 0.007404 | 0.039179 |
| IPMK      | 130.5963 | 1.105783 | 0.29065 | 3.80452 | 0.000142 | 0.002839 |
| IPW       | 8.164039 | 3.597897 | 1.35445 | 2.65636 | 0.007899 | 0.040904 |
| IQCA1     | 4.299804 | 4.973094 | 1.6196  | 3.07057 | 0.002137 | 0.017686 |
| IQCH      | 9.476638 | 1.907849 | 0.74573 | 2.55836 | 0.010517 | 0.049364 |
| IRAG2     | 10.75865 | 2.238654 | 0.74656 | 2.99863 | 0.002712 | 0.020672 |
| IRAK3     | 10.15722 | 2.523995 | 0.63991 | 3.94431 | 8.00E-05 | 0.001878 |
| IRF8      | 18.70334 | 1.74395  | 0.48481 | 3.59717 | 0.000322 | 0.00502  |
| IRS1      | 31.85802 | 1.213598 | 0.36196 | 3.35287 | 0.0008   | 0.009229 |
| IRS4      | 2.449946 | 4.671298 | 1.68998 | 2.76411 | 0.005708 | 0.033446 |
| IRX2      | 6.384401 | 1.814899 | 0.59104 | 3.0707  | 0.002136 | 0.017686 |
| ISG15     | 31.88346 | 2.02859  | 0.38663 | 5.2468  | 1.55E-07 | 1.35E-05 |
| ISL1      | 5.863082 | 2.727376 | 1.00269 | 2.72006 | 0.006527 | 0.036216 |
| ISL1-DT   | 5.183531 | 3.123858 | 1.16199 | 2.68837 | 0.00718  | 0.038325 |
| ISYNA1    | 106.9871 | 1.527049 | 0.42203 | 3.61832 | 0.000297 | 0.004728 |
| ITGA10    | 4.251541 | 3.892955 | 1.39362 | 2.79342 | 0.005215 | 0.031591 |
| ITGA2     | 8.454821 | 3.190664 | 0.93959 | 3.39581 | 0.000684 | 0.008307 |
| ITGA4     | 13.29177 | 3.069287 | 0.86459 | 3.54997 | 0.000385 | 0.005738 |
| ITGA6     | 29.79405 | 1.229781 | 0.45452 | 2.70569 | 0.006816 | 0.037242 |
| ITGA8     | 12.97161 | 5.629875 | 1.31359 | 4.28586 | 1.82E-05 | 0.000599 |
| ITGAD     | 3.644865 | 2.859509 | 1.07559 | 2.65855 | 0.007848 | 0.040756 |
| ITGB2     | 20.71886 | 1.851375 | 0.6676  | 2.77318 | 0.005551 | 0.032874 |
| ITGB8     | 35.69142 | 1.664488 | 0.40164 | 4.14428 | 3.41E-05 | 0.000969 |
| ITGBL1    | 10.6415  | 3.004464 | 0.94301 | 3.18603 | 0.001442 | 0.013688 |
| ITIH2     | 3.446705 | 5.167995 | 1.94357 | 2.65903 | 0.007837 | 0.040712 |
| ITK       | 7.021058 | 2.283551 | 0.86739 | 2.63267 | 0.008472 | 0.04272  |
| ITLN1     | 2.042481 | 3.83294  | 1.35545 | 2.82779 | 0.004687 | 0.02953  |
| ITM2A     | 5.122292 | 3.71144  | 1.21761 | 3.04814 | 0.002303 | 0.018641 |
| ITPR3     | 42.64349 | 1.216087 | 0.45578 | 2.66812 | 0.007628 | 0.039973 |
| IYD       | 4.834867 | 3.259429 | 1.15989 | 2.81012 | 0.004952 | 0.030617 |
| JAKMIP2   | 8.387644 | 3.49432  | 1.21322 | 2.8802  | 0.003974 | 0.026672 |
| JPH2      | 30.8866  | 4.494562 | 0.62819 | 7.15482 | 8.38E-13 | 3.66E-10 |
| JPT1      | 67.81492 | 1.368904 | 0.2846  | 4.80993 | 1.51E-06 | 8.45E-05 |
| KATNAL1   | 13.02086 | 2.690644 | 0.70416 | 3.82107 | 0.000133 | 0.002701 |
| KAZALD1   | 5.346684 | 1.7445   | 0.67171 | 2.59709 | 0.009402 | 0.045865 |

|          |          |          |         |         |          |          |
|----------|----------|----------|---------|---------|----------|----------|
| KCNA2    | 5.421228 | 5.329751 | 1.83211 | 2.90908 | 0.003625 | 0.025131 |
| KCNA3    | 10.62502 | 1.802246 | 0.7053  | 2.5553  | 0.01061  | 0.049568 |
| KCNA4    | 4.327002 | 4.991836 | 1.78657 | 2.79409 | 0.005205 | 0.03154  |
| KCNAB1   | 2.88989  | 4.903742 | 1.7268  | 2.83979 | 0.004514 | 0.028874 |
| KCNAB2   | 10.16469 | 1.853292 | 0.58369 | 3.17512 | 0.001498 | 0.014029 |
| KCNC1    | 9.353783 | 3.945547 | 1.29015 | 3.05821 | 0.002227 | 0.018218 |
| KCNC2    | 13.02775 | 4.458498 | 1.35671 | 3.28626 | 0.001015 | 0.01076  |
| KCND2    | 9.053948 | 5.101358 | 1.35764 | 3.75751 | 0.000172 | 0.003268 |
| KCND3    | 4.095563 | 3.815827 | 1.22231 | 3.12182 | 0.001797 | 0.015825 |
| KCNG3    | 3.896016 | 4.304972 | 1.60639 | 2.67991 | 0.007364 | 0.039021 |
| KCNH8    | 7.386111 | 3.27727  | 1.21918 | 2.68809 | 0.007186 | 0.03833  |
| KCNIP1   | 3.011256 | 3.874407 | 1.38791 | 2.79154 | 0.005246 | 0.031704 |
| KCNJ13   | 2.736534 | 4.239734 | 1.52619 | 2.77799 | 0.00547  | 0.032618 |
| KCNJ15   | 8.250571 | 2.177488 | 0.75836 | 2.87132 | 0.004088 | 0.027179 |
| KCNJ16   | 4.722009 | 4.593466 | 1.32738 | 3.46056 | 0.000539 | 0.007161 |
| KCNJ3    | 5.892949 | 3.949513 | 1.34961 | 2.9264  | 0.003429 | 0.024145 |
| KCNK2    | 3.778737 | 5.258861 | 1.37681 | 3.81958 | 0.000134 | 0.002708 |
| KCNMB4   | 8.598802 | 3.682262 | 1.00554 | 3.66198 | 0.00025  | 0.004218 |
| KCNN2    | 3.949836 | 5.364628 | 1.99397 | 2.69043 | 0.007136 | 0.038213 |
| KCNQ1OT1 | 44.27983 | 2.518838 | 0.73744 | 3.41564 | 0.000636 | 0.008012 |
| KCNQ5    | 6.508799 | 5.572542 | 1.41888 | 3.92741 | 8.59E-05 | 0.001989 |
| KCNT2    | 12.82894 | 4.185057 | 1.08974 | 3.84043 | 0.000123 | 0.002562 |
| KCNV1    | 7.950061 | 5.374125 | 1.44274 | 3.72496 | 0.000195 | 0.003557 |
| KCTD12   | 61.66577 | 1.41379  | 0.41568 | 3.40115 | 0.000671 | 0.008231 |
| KCTD16   | 13.31859 | 4.240084 | 1.18391 | 3.58142 | 0.000342 | 0.005242 |
| KCTD4    | 12.37472 | -1.11786 | 0.35449 | -3.1534 | 0.001614 | 0.014748 |
| KHDRBS2  | 6.503387 | 3.291798 | 1.19562 | 2.75321 | 0.005901 | 0.034087 |
| KHDRBS3  | 12.33207 | 1.990252 | 0.63748 | 3.12208 | 0.001796 | 0.015825 |
| KIAA0513 | 33.87604 | 1.556064 | 0.42391 | 3.67071 | 0.000242 | 0.004129 |
| KIAA0825 | 13.67428 | 3.027206 | 0.98572 | 3.07106 | 0.002133 | 0.017686 |
| KIAA0895 | 7.801879 | 2.433962 | 0.84731 | 2.87258 | 0.004071 | 0.027132 |
| KIAA1671 | 13.03841 | 1.876843 | 0.52489 | 3.57569 | 0.000349 | 0.005318 |
| KIF15    | 7.703717 | 2.020778 | 0.69107 | 2.92411 | 0.003454 | 0.024218 |
| KIF20B   | 30.28099 | 1.375267 | 0.5071  | 2.71203 | 0.006687 | 0.036765 |
| KIF28P   | 1.942057 | 3.809483 | 1.40099 | 2.71914 | 0.006545 | 0.036251 |
| KIF3C    | 4.848567 | 2.313939 | 0.73071 | 3.16668 | 0.001542 | 0.014302 |
| KLF12    | 15.95005 | 2.816208 | 0.74427 | 3.78386 | 0.000154 | 0.003032 |
| KLF7     | 23.75176 | 1.871598 | 0.43289 | 4.32351 | 1.54E-05 | 0.000526 |
| KLF9     | 13.98803 | 1.600321 | 0.62562 | 2.55796 | 0.010529 | 0.049368 |
| KLHL13   | 4.476618 | 5.069195 | 1.17232 | 4.32409 | 1.53E-05 | 0.000526 |
| KLHL14   | 7.062614 | 5.685051 | 1.38815 | 4.09541 | 4.21E-05 | 0.001143 |
| KLHL4    | 5.333006 | 3.621101 | 1.16495 | 3.10838 | 0.001881 | 0.016264 |
| KLHL6    | 10.14019 | 2.301132 | 0.7786  | 2.95546 | 0.003122 | 0.022777 |
| KLKB1    | 2.542761 | 4.633714 | 1.42827 | 3.24428 | 0.001177 | 0.011927 |

|         |          |          |         |         |          |          |
|---------|----------|----------|---------|---------|----------|----------|
| KLRC1   | 4.933758 | 3.326149 | 1.03112 | 3.22577 | 0.001256 | 0.012507 |
| KLRG1   | 5.775763 | 2.847661 | 1.05179 | 2.70743 | 0.006781 | 0.037122 |
| KMT5C   | 5.47964  | 1.517053 | 0.58733 | 2.58295 | 0.009796 | 0.04712  |
| KNSTRN  | 109.8521 | -1.01818 | 0.25425 | -4.0047 | 6.21E-05 | 0.001554 |
| KRT14   | 17.38877 | 1.765077 | 0.55227 | 3.19606 | 0.001393 | 0.013407 |
| KRT17   | 29.48655 | 2.082172 | 0.50202 | 4.14759 | 3.36E-05 | 0.000962 |
| KRT24   | 6.676936 | 4.613329 | 1.02699 | 4.49208 | 7.05E-06 | 0.000295 |
| KRT5    | 16.31414 | 2.798812 | 0.68328 | 4.09612 | 4.20E-05 | 0.001142 |
| KRT6A   | 24.77797 | 2.631868 | 0.50138 | 5.24924 | 1.53E-07 | 1.33E-05 |
| KSR2    | 9.874951 | 4.19184  | 1.32201 | 3.1708  | 0.00152  | 0.014182 |
| KYAT1   | 15.68258 | 1.448638 | 0.3356  | 4.31652 | 1.59E-05 | 0.000541 |
| L1CAM   | 4.678162 | 2.33446  | 0.65616 | 3.55776 | 0.000374 | 0.005605 |
| L1TD1   | 12.69226 | 2.279153 | 0.60801 | 3.74858 | 0.000178 | 0.003359 |
| L3MBTL4 | 6.869406 | 3.216139 | 1.07052 | 3.00427 | 0.002662 | 0.020417 |
| LAMA1   | 6.697602 | 3.621091 | 1.2269  | 2.95141 | 0.003163 | 0.023005 |
| LAMA4   | 17.99972 | 1.391505 | 0.40943 | 3.39864 | 0.000677 | 0.00828  |
| LAMA5   | 69.9941  | 1.373071 | 0.35591 | 3.85791 | 0.000114 | 0.00242  |
| LAMC2   | 13.00872 | 2.60115  | 0.58248 | 4.46563 | 7.98E-06 | 0.000324 |
| LAPTM5  | 40.44045 | 1.423369 | 0.49936 | 2.85038 | 0.004367 | 0.028261 |
| LARP6   | 2.427775 | 3.534393 | 1.34603 | 2.62578 | 0.008645 | 0.043324 |
| LASP1   | 113.7169 | 1.324603 | 0.32261 | 4.10588 | 4.03E-05 | 0.001096 |
| LBR     | 10.5421  | 1.876285 | 0.60599 | 3.09621 | 0.00196  | 0.016687 |
| LCAL1   | 213.6846 | -1.38231 | 0.30993 | -4.4601 | 8.19E-06 | 0.000329 |
| LDHA    | 616.2992 | 2.718511 | 0.30316 | 8.96721 | 3.04E-19 | 4.54E-16 |
| LDLR    | 28.32347 | 1.300534 | 0.30633 | 4.24555 | 2.18E-05 | 0.000685 |
| LEKR1   | 8.1787   | 2.893632 | 1.04131 | 2.77885 | 0.005455 | 0.032572 |
| LEP     | 3235.57  | 5.230946 | 0.44479 | 11.7606 | 6.23E-32 | 1.01E-27 |
| LETM2   | 26.83861 | 1.160659 | 0.34645 | 3.35016 | 0.000808 | 0.009271 |
| LGALS1  | 41.47929 | 1.413545 | 0.4208  | 3.35918 | 0.000782 | 0.009112 |
| LGALS9  | 11.53256 | 1.584958 | 0.58037 | 2.73096 | 0.006315 | 0.035579 |
| LGR6    | 2.840179 | 4.305563 | 1.65052 | 2.60862 | 0.009091 | 0.045014 |
| LHFPL3  | 2.643166 | 3.796204 | 1.3847  | 2.74153 | 0.006115 | 0.034837 |
| LHFPL6  | 7.714018 | 1.38633  | 0.47701 | 2.90631 | 0.003657 | 0.025246 |
| LHX2    | 2.947329 | 4.450988 | 1.38394 | 3.21618 | 0.001299 | 0.012783 |
| LIMD1   | 330.7295 | 1.057819 | 0.31173 | 3.39338 | 0.00069  | 0.00836  |
| LIMS2   | 41.37197 | 2.018749 | 0.47923 | 4.21251 | 2.53E-05 | 0.000762 |
| LINGO2  | 18.59756 | 4.966745 | 1.11936 | 4.43714 | 9.12E-06 | 0.000359 |
| LIPI    | 3.29327  | 5.099693 | 1.97671 | 2.57989 | 0.009883 | 0.047329 |
| LIPK    | 5.192331 | 4.198765 | 1.55896 | 2.69331 | 0.007075 | 0.03805  |
| LIPM    | 4.459815 | 4.536593 | 1.53322 | 2.95887 | 0.003088 | 0.022618 |
| LMNB1   | 12.93452 | 1.273965 | 0.47164 | 2.70114 | 0.00691  | 0.037572 |
| LMNTD1  | 5.804957 | 3.937032 | 1.47013 | 2.67802 | 0.007406 | 0.039179 |
| LMO3    | 9.544376 | 2.993731 | 1.10504 | 2.70915 | 0.006745 | 0.03698  |
| LPAR1   | 14.70504 | 2.274649 | 0.47368 | 4.80205 | 1.57E-06 | 8.70E-05 |

|            |          |          |         |         |          |          |
|------------|----------|----------|---------|---------|----------|----------|
| LPGAT1-AS1 | 3.440167 | 4.663642 | 1.81385 | 2.57113 | 0.010137 | 0.0483   |
| LRAT       | 4.832919 | 4.040524 | 1.48361 | 2.72343 | 0.006461 | 0.036035 |
| LRATD1     | 12.80857 | 2.065342 | 0.70311 | 2.93746 | 0.003309 | 0.02363  |
| LRCH2      | 3.578622 | 3.215605 | 1.11604 | 2.88127 | 0.003961 | 0.026592 |
| LRFN2      | 1.707029 | 4.144287 | 1.43665 | 2.8847  | 0.003918 | 0.0264   |
| LRFN5      | 4.085413 | 2.853437 | 1.05823 | 2.69642 | 0.007009 | 0.037809 |
| LRIG1      | 4.087168 | 3.53371  | 1.33296 | 2.65102 | 0.008025 | 0.041312 |
| LRP12      | 8.452908 | 3.346939 | 1.029   | 3.25263 | 0.001143 | 0.011685 |
| LRP1B      | 33.94669 | 4.955767 | 1.25388 | 3.95236 | 7.74E-05 | 0.001843 |
| LRP2       | 32.59559 | 1.633868 | 0.57351 | 2.84888 | 0.004387 | 0.028324 |
| LRRC19     | 2.784378 | 4.842515 | 1.7081  | 2.83503 | 0.004582 | 0.029085 |
| LRRC2      | 6.279753 | 4.50721  | 1.43878 | 3.13265 | 0.001732 | 0.015413 |
| LRRC31     | 5.623759 | 3.977649 | 1.50143 | 2.64924 | 0.008067 | 0.041429 |
| LRRC32     | 60.82267 | 1.401879 | 0.26397 | 5.31085 | 1.09E-07 | 1.02E-05 |
| LRRC4C     | 7.343024 | 3.805292 | 1.37275 | 2.77202 | 0.005571 | 0.032971 |
| LRRC7      | 8.396162 | 5.978928 | 1.62948 | 3.66923 | 0.000243 | 0.004149 |
| LRRC8A     | 223.7622 | 1.397697 | 0.1729  | 8.08388 | 6.27E-16 | 6.34E-13 |
| LRRC8B     | 20.52567 | 1.382143 | 0.47358 | 2.91851 | 0.003517 | 0.024533 |
| LRRC8C     | 8.693083 | 2.115656 | 0.80372 | 2.63234 | 0.00848  | 0.042748 |
| LRRC8D     | 8.653946 | 1.82368  | 0.48811 | 3.73622 | 0.000187 | 0.003457 |
| LRRCC1     | 6.37631  | 2.352392 | 0.91775 | 2.56323 | 0.01037  | 0.04898  |
| LRRIQ3     | 4.313494 | 4.003473 | 1.37723 | 2.9069  | 0.00365  | 0.025242 |
| LRRK2      | 25.54489 | 3.054451 | 0.81062 | 3.76804 | 0.000165 | 0.003173 |
| LRRN4      | 1.823971 | 3.693157 | 1.30137 | 2.83791 | 0.004541 | 0.028983 |
| LRRTM4     | 5.203147 | 3.440857 | 1.29675 | 2.65345 | 0.007967 | 0.041153 |
| LSAMP      | 6.310019 | 3.684997 | 1.22301 | 3.01305 | 0.002586 | 0.020084 |
| LSP1       | 25.81119 | 1.519583 | 0.46862 | 3.24269 | 0.001184 | 0.011964 |
| LTA4H      | 32.44507 | 1.545663 | 0.39714 | 3.89201 | 9.94E-05 | 0.002184 |
| LTF        | 29.91492 | 3.451123 | 0.657   | 5.25283 | 1.50E-07 | 1.32E-05 |
| LUM        | 29.51144 | 1.477203 | 0.42847 | 3.44764 | 0.000565 | 0.007416 |
| LUZP2      | 5.900942 | 4.944907 | 1.65879 | 2.98104 | 0.002873 | 0.021502 |
| LY6D       | 73.40882 | 1.284765 | 0.38515 | 3.33576 | 0.000851 | 0.009539 |
| LY6K       | 31.36749 | 1.614577 | 0.48175 | 3.35145 | 0.000804 | 0.00925  |
| LYG2       | 3.873692 | 3.360675 | 1.26074 | 2.66564 | 0.007684 | 0.040165 |
| LYPD1      | 2.549513 | 4.15288  | 1.59663 | 2.60102 | 0.009295 | 0.04559  |
| LYSMD2     | 3.188163 | 3.469531 | 1.1398  | 3.04398 | 0.002335 | 0.018832 |
| LYSMD4     | 4.556211 | 2.480925 | 0.89876 | 2.76038 | 0.005773 | 0.03366  |
| LYVE1      | 10.73335 | 1.651115 | 0.62214 | 2.65394 | 0.007956 | 0.041119 |
| LZTFL1     | 10.96618 | 1.678396 | 0.59788 | 2.80726 | 0.004997 | 0.030773 |
| MACC1      | 44.40116 | 1.952276 | 0.31035 | 6.29057 | 3.16E-10 | 7.06E-08 |
| MAF        | 14.59771 | 2.20842  | 0.56956 | 3.87741 | 0.000106 | 0.002276 |
| MAFB       | 18.42332 | 1.353246 | 0.44106 | 3.0682  | 0.002154 | 0.017763 |
| MAGI2      | 10.37186 | 1.900508 | 0.74406 | 2.55425 | 0.010642 | 0.049588 |
| MAK        | 6.683197 | 2.750748 | 0.91183 | 3.01673 | 0.002555 | 0.019944 |

|           |          |          |         |         |          |          |
|-----------|----------|----------|---------|---------|----------|----------|
| MALRD1    | 17.80646 | 4.046324 | 1.0198  | 3.96775 | 7.26E-05 | 0.001756 |
| MAP1A     | 7.947031 | 1.679756 | 0.50087 | 3.3537  | 0.000797 | 0.009229 |
| MAP2      | 13.88532 | 3.081026 | 0.94982 | 3.24379 | 0.00118  | 0.011938 |
| MAP3K20   | 31.59697 | 1.431511 | 0.4423  | 3.23648 | 0.00121  | 0.012119 |
| MAP3K7CL  | 61.53405 | 1.49128  | 0.47041 | 3.17016 | 0.001524 | 0.014193 |
| MAPK10    | 17.75254 | 2.298358 | 0.68164 | 3.3718  | 0.000747 | 0.008832 |
| MAPRE2    | 22.22843 | 1.660749 | 0.39281 | 4.2279  | 2.36E-05 | 0.000734 |
| MASP1     | 4.481265 | 4.470332 | 1.42845 | 3.1295  | 0.001751 | 0.015547 |
| MAST1     | 3.164944 | 4.490422 | 1.67975 | 2.67327 | 0.007512 | 0.039576 |
| MATK      | 4.672839 | 2.205952 | 0.74294 | 2.9692  | 0.002986 | 0.022152 |
| MBLAC2    | 7.811244 | 3.229618 | 1.00379 | 3.21742 | 0.001294 | 0.012746 |
| MBNL1-AS1 | 11.0841  | 3.012785 | 0.86419 | 3.48625 | 0.00049  | 0.006717 |
| MBOAT2    | 34.43186 | 1.179141 | 0.38176 | 3.08871 | 0.00201  | 0.016962 |
| MBP       | 20.92904 | 1.491656 | 0.42025 | 3.54947 | 0.000386 | 0.005738 |
| MCC       | 11.56922 | 2.622111 | 0.63152 | 4.15208 | 3.29E-05 | 0.000946 |
| MCEMP1    | 2.113757 | 3.480182 | 1.16341 | 2.99137 | 0.002777 | 0.020981 |
| MCM10     | 5.466087 | 2.375181 | 0.82382 | 2.88314 | 0.003937 | 0.026501 |
| MCM6      | 17.30178 | 1.325569 | 0.51881 | 2.55501 | 0.010619 | 0.049574 |
| MCOLN2    | 4.29647  | 2.916047 | 0.97728 | 2.98383 | 0.002847 | 0.021366 |
| MCOLN3    | 4.515204 | 2.259495 | 0.81244 | 2.78112 | 0.005417 | 0.032449 |
| MCTP1     | 13.52648 | 2.874263 | 0.68516 | 4.19501 | 2.73E-05 | 0.000812 |
| MDFI      | 27.2225  | 1.33525  | 0.3733  | 3.57688 | 0.000348 | 0.005303 |
| MDN1      | 67.78571 | 1.236396 | 0.37247 | 3.31945 | 0.000902 | 0.009926 |
| MECOM     | 15.38682 | 2.772322 | 0.80547 | 3.44185 | 0.000578 | 0.007527 |
| MEDAG     | 4.074339 | 2.745119 | 1.01365 | 2.70815 | 0.006766 | 0.037055 |
| MEF2C     | 16.21659 | 1.527501 | 0.55695 | 2.74261 | 0.006095 | 0.034796 |
| MEGF10    | 11.58412 | 2.970045 | 1.04708 | 2.8365  | 0.004561 | 0.029033 |
| MEGF8     | 5.586352 | 2.090517 | 0.67452 | 3.09927 | 0.00194  | 0.016577 |
| MEGF9     | 12.32888 | 1.345397 | 0.45941 | 2.92855 | 0.003405 | 0.024053 |
| MEI1      | 2.209347 | 3.875607 | 1.23029 | 3.15015 | 0.001632 | 0.014855 |
| MEI4      | 4.682145 | 4.592325 | 1.66766 | 2.75376 | 0.005892 | 0.034087 |
| MGAM      | 4.014104 | 4.319137 | 1.43495 | 3.00995 | 0.002613 | 0.020173 |
| MGAT3     | 30.73293 | 2.859549 | 0.48534 | 5.89183 | 3.82E-09 | 5.67E-07 |
| MGAT4C    | 8.405271 | 3.93208  | 1.18748 | 3.31129 | 0.000929 | 0.010131 |
| MGAT5B    | 2.150389 | 4.389687 | 1.63252 | 2.6889  | 0.007169 | 0.038322 |
| MIAT      | 2.750887 | 4.816526 | 1.5013  | 3.20824 | 0.001336 | 0.01303  |
| MICAL3    | 78.78215 | 1.480222 | 0.25501 | 5.80448 | 6.46E-09 | 8.92E-07 |
| MID1      | 104.6443 | 1.759312 | 0.24376 | 7.21727 | 5.30E-13 | 2.45E-10 |
| MIPOL1    | 13.02169 | 3.241398 | 1.04441 | 3.10356 | 0.001912 | 0.016434 |
| MISP      | 6.646852 | 1.694235 | 0.66267 | 2.55668 | 0.010568 | 0.049478 |
| MKI67     | 14.85549 | 2.18857  | 0.65495 | 3.34159 | 0.000833 | 0.00945  |
| MKS1      | 6.922111 | 1.42836  | 0.51671 | 2.76435 | 0.005704 | 0.033434 |
| MLIP      | 8.949721 | 2.149892 | 0.809   | 2.65746 | 0.007873 | 0.040836 |
| MME       | 380.3122 | 2.04559  | 0.34567 | 5.91768 | 3.27E-09 | 5.12E-07 |



|          |          |          |         |         |          |          |
|----------|----------|----------|---------|---------|----------|----------|
| MMP14    | 68.31816 | 1.931245 | 0.32366 | 5.96694 | 2.42E-09 | 4.08E-07 |
| MMP16    | 11.8657  | 3.811351 | 1.09051 | 3.49502 | 0.000474 | 0.006561 |
| MMP2     | 12.5993  | 2.753596 | 0.59332 | 4.64102 | 3.47E-06 | 0.000163 |
| MMRN1    | 23.63234 | 1.435856 | 0.52582 | 2.73068 | 0.00632  | 0.035582 |
| MMS22L   | 20.27309 | 2.514494 | 0.73297 | 3.43056 | 0.000602 | 0.007698 |
| MNS1     | 4.559233 | 3.664657 | 1.38335 | 2.64911 | 0.00807  | 0.041429 |
| MOK      | 7.458026 | 1.988758 | 0.77528 | 2.5652  | 0.010312 | 0.048788 |
| MORC1    | 6.661065 | 3.322164 | 1.03702 | 3.20356 | 0.001357 | 0.013196 |
| MOV10L1  | 3.712205 | 5.195468 | 1.3229  | 3.92733 | 8.59E-05 | 0.001989 |
| MOXD1    | 28.20232 | -1.5111  | 0.52093 | -2.9008 | 0.003722 | 0.025511 |
| MPDZ     | 49.18915 | 1.426625 | 0.49907 | 2.85854 | 0.004256 | 0.027845 |
| MPPED2   | 3.627039 | 4.204397 | 1.3749  | 3.05796 | 0.002228 | 0.018224 |
| MPZL2    | 4.336835 | 2.837262 | 0.92979 | 3.0515  | 0.002277 | 0.018517 |
| MPZL3    | 7.090089 | 2.118132 | 0.76937 | 2.75309 | 0.005904 | 0.034087 |
| MROH2B   | 3.533657 | 3.253756 | 1.26304 | 2.57613 | 0.009991 | 0.04772  |
| MROH9    | 5.366537 | 4.774026 | 1.49306 | 3.19748 | 0.001386 | 0.013373 |
| MS4A2    | 3.46879  | 4.660487 | 1.58981 | 2.93147 | 0.003374 | 0.02392  |
| MSLN     | 2.016104 | 3.279102 | 1.23162 | 2.66243 | 0.007758 | 0.040381 |
| MSN      | 97.78616 | 1.343287 | 0.37627 | 3.56999 | 0.000357 | 0.005409 |
| MSR1     | 18.06169 | 2.7491   | 0.79448 | 3.46025 | 0.00054  | 0.007163 |
| MSTN     | 2.000375 | 4.308566 | 1.48142 | 2.90841 | 0.003633 | 0.025156 |
| MTARC1   | 17.18042 | 1.4456   | 0.371   | 3.89647 | 9.76E-05 | 0.002156 |
| MTDH     | 9.701064 | 1.984903 | 0.72779 | 2.72728 | 0.006386 | 0.03581  |
| MTFR2    | 6.309639 | 3.061299 | 1.05259 | 2.90836 | 0.003633 | 0.025156 |
| MTHFD2   | 24.28811 | 1.54162  | 0.41919 | 3.67762 | 0.000235 | 0.004046 |
| MTNR1A   | 3.111105 | 4.988596 | 1.80512 | 2.76358 | 0.005717 | 0.033477 |
| MTRNR2L2 | 83.36599 | 3.172486 | 0.83425 | 3.80282 | 0.000143 | 0.002855 |
| MTRNR2L8 | 119.343  | 2.497377 | 0.73001 | 3.42103 | 0.000624 | 0.007898 |
| MTSS2    | 275.4515 | 2.108143 | 0.31169 | 6.76369 | 1.35E-11 | 4.94E-09 |
| MTUS2    | 4.125954 | 4.359033 | 1.35382 | 3.21981 | 0.001283 | 0.012703 |
| MUC1     | 25.25485 | 2.259293 | 0.64032 | 3.52837 | 0.000418 | 0.006063 |
| MUC15    | 1606.098 | -1.40526 | 0.28666 | -4.9022 | 9.48E-07 | 5.83E-05 |
| MUC19    | 31.52074 | 2.886326 | 0.79665 | 3.6231  | 0.000291 | 0.004674 |
| MUSK     | 10.63079 | 4.111602 | 1.21622 | 3.38063 | 0.000723 | 0.00861  |
| MX1      | 27.86467 | 1.605138 | 0.35896 | 4.47165 | 7.76E-06 | 0.000318 |
| MXRA7    | 27.88452 | 1.332227 | 0.47275 | 2.81805 | 0.004832 | 0.030045 |
| MYB      | 5.250698 | 3.222857 | 1.13359 | 2.84305 | 0.004468 | 0.02869  |
| MYBL2    | 6.447129 | 1.778928 | 0.69717 | 2.55164 | 0.010722 | 0.049823 |
| MYBPC1   | 6.419602 | 5.073878 | 1.54165 | 3.29121 | 0.000998 | 0.010624 |
| MYCN     | 10.84337 | 2.042021 | 0.58778 | 3.47411 | 0.000513 | 0.00694  |
| MYCT1    | 11.03525 | 1.730201 | 0.55202 | 3.13429 | 0.001723 | 0.01537  |
| MYEF2    | 20.90049 | 3.866589 | 1.03333 | 3.74188 | 0.000183 | 0.003422 |
| MYH1     | 4.793945 | 4.633697 | 1.48769 | 3.11468 | 0.001841 | 0.016023 |
| MYH15    | 9.873818 | 4.558624 | 1.30354 | 3.49711 | 0.00047  | 0.006521 |

|           |          |          |         |         |          |          |
|-----------|----------|----------|---------|---------|----------|----------|
| MYH2      | 5.510528 | 4.439619 | 1.37903 | 3.21938 | 0.001285 | 0.012703 |
| MYH6      | 13.23868 | -2.48406 | 0.96569 | -2.5723 | 0.010102 | 0.048178 |
| MYL9      | 36.23163 | 1.519453 | 0.41081 | 3.69868 | 0.000217 | 0.003829 |
| MYLK3     | 4.734393 | 3.725477 | 1.23925 | 3.00623 | 0.002645 | 0.020344 |
| MYO10     | 26.89694 | 1.209788 | 0.30615 | 3.95159 | 7.76E-05 | 0.001843 |
| MYO18B    | 6.311819 | 3.473875 | 1.22159 | 2.84374 | 0.004459 | 0.028651 |
| MYO3A     | 10.06459 | 4.881551 | 1.40729 | 3.46876 | 0.000523 | 0.007015 |
| MYO7B     | 57.30874 | 2.649401 | 0.57148 | 4.63606 | 3.55E-06 | 0.000165 |
| MYOCD-AS1 | 1.519163 | 3.879877 | 1.50336 | 2.5808  | 0.009857 | 0.04726  |
| MYOF      | 622.9708 | 1.114758 | 0.23212 | 4.80258 | 1.57E-06 | 8.70E-05 |
| MYT1L     | 8.079309 | 2.945098 | 1.10981 | 2.65368 | 0.007962 | 0.041137 |
| NALF1     | 6.016765 | 3.354364 | 1.15593 | 2.90188 | 0.003709 | 0.025443 |
| NANOS1    | 16.47926 | 1.220867 | 0.39527 | 3.08873 | 0.00201  | 0.016962 |
| NAPSB     | 3.668929 | 2.943984 | 1.09329 | 2.69278 | 0.007086 | 0.038085 |
| NAT1      | 7.213358 | 2.841308 | 0.79078 | 3.59302 | 0.000327 | 0.005073 |
| NAV2-AS4  | 133.0532 | -1.43958 | 0.36695 | -3.9231 | 8.74E-05 | 0.002007 |
| NAV3      | 18.31251 | 3.684215 | 0.87249 | 4.22264 | 2.41E-05 | 0.000746 |
| NBEA      | 27.35361 | 2.932062 | 0.94234 | 3.11148 | 0.001862 | 0.016135 |
| NBEAL2    | 19.30181 | 1.211691 | 0.41302 | 2.93376 | 0.003349 | 0.023842 |
| NBPF13P   | 8.571766 | 4.647017 | 0.94125 | 4.93708 | 7.93E-07 | 5.01E-05 |
| NCALD     | 12.59789 | 3.914799 | 0.78834 | 4.96585 | 6.84E-07 | 4.39E-05 |
| NCAPG     | 10.99579 | 4.104596 | 0.92692 | 4.42821 | 9.50E-06 | 0.000371 |
| NCAPH     | 3.787052 | 1.926418 | 0.67239 | 2.86503 | 0.00417  | 0.027533 |
| NCKAP1L   | 20.0707  | 1.777094 | 0.61736 | 2.87852 | 0.003996 | 0.026781 |
| NCKAP5L   | 13.40837 | 1.478539 | 0.40799 | 3.624   | 0.00029  | 0.004671 |
| NCMAP     | 1534.453 | -1.09298 | 0.18414 | -5.9355 | 2.93E-09 | 4.78E-07 |
| NCOR2     | 146.249  | 1.270171 | 0.22925 | 5.54057 | 3.01E-08 | 3.45E-06 |
| ND1       | 6901.722 | 1.330939 | 0.30081 | 4.42455 | 9.66E-06 | 0.000376 |
| ND2       | 8781.759 | 1.300542 | 0.28038 | 4.63857 | 3.51E-06 | 0.000164 |
| ND4       | 16458.17 | 1.006228 | 0.27079 | 3.71588 | 0.000202 | 0.003646 |
| ND6       | 853.2692 | 1.359459 | 0.49436 | 2.74996 | 0.00596  | 0.034316 |
| NDRG1     | 1217.651 | 1.881428 | 0.2774  | 6.78225 | 1.18E-11 | 4.45E-09 |
| NDRG2     | 219.7686 | 1.167804 | 0.29631 | 3.94117 | 8.11E-05 | 0.001897 |
| NDST4     | 2.882313 | 4.835928 | 1.66515 | 2.9042  | 0.003682 | 0.025346 |
| NECTIN4   | 360.5037 | 1.128265 | 0.18151 | 6.21604 | 5.10E-10 | 9.93E-08 |
| NEDD9     | 166.1783 | 1.930378 | 0.21136 | 9.13292 | 6.67E-20 | 1.20E-16 |
| NEFM      | 6.974976 | 5.190875 | 1.61859 | 3.20703 | 0.001341 | 0.013066 |
| NEIL3     | 9.304441 | 1.62426  | 0.5761  | 2.8194  | 0.004811 | 0.029994 |
| NEK10     | 10.54996 | 2.691648 | 0.96088 | 2.80122 | 0.005091 | 0.031111 |
| NEK11     | 375.9163 | 1.806355 | 0.32724 | 5.51998 | 3.39E-08 | 3.81E-06 |
| NEK2      | 5.452291 | 4.835482 | 1.43069 | 3.37982 | 0.000725 | 0.008617 |
| NEK5      | 8.864952 | 2.53479  | 0.8635  | 2.93547 | 0.00333  | 0.02376  |
| NEK6      | 42.34249 | 2.520964 | 0.39383 | 6.40109 | 1.54E-10 | 4.22E-08 |
| NELL1     | 5.519922 | 5.353923 | 1.83047 | 2.9249  | 0.003446 | 0.024189 |

|           |          |          |         |         |          |          |
|-----------|----------|----------|---------|---------|----------|----------|
| NELL2     | 7.430006 | 5.788263 | 1.44516 | 4.00526 | 6.19E-05 | 0.001553 |
| NETO1     | 8.054888 | 3.371613 | 1.23627 | 2.72725 | 0.006386 | 0.03581  |
| NEURL1    | 214.9717 | 1.058038 | 0.17892 | 5.91331 | 3.35E-09 | 5.17E-07 |
| NEUROD4   | 4.359001 | 4.971306 | 1.50806 | 3.29649 | 0.000979 | 0.010489 |
| NFATC2    | 20.50731 | 1.569047 | 0.58817 | 2.66768 | 0.007638 | 0.039996 |
| NFIB      | 35.83969 | 1.274608 | 0.40009 | 3.18584 | 0.001443 | 0.013688 |
| NHS       | 16.68298 | 1.113795 | 0.39826 | 2.79663 | 0.005164 | 0.031408 |
| NKAIN2    | 5.549784 | 4.36879  | 1.44743 | 3.01832 | 0.002542 | 0.019878 |
| NKAIN3    | 3.752544 | 3.700649 | 1.4459  | 2.5594  | 0.010485 | 0.049272 |
| NKG7      | 11.38453 | 2.547207 | 0.82087 | 3.10306 | 0.001915 | 0.016444 |
| NLRC3     | 6.809314 | 1.846915 | 0.6687  | 2.76197 | 0.005745 | 0.033545 |
| NLRC5     | 22.94375 | 1.442993 | 0.55798 | 2.58609 | 0.009707 | 0.046804 |
| NLRP13    | 3.345774 | 4.572233 | 1.6877  | 2.70914 | 0.006746 | 0.03698  |
| NLRP9     | 3.025419 | 4.948581 | 1.85019 | 2.67463 | 0.007481 | 0.039474 |
| NME5      | 3.828644 | 4.776258 | 1.70045 | 2.80883 | 0.004972 | 0.03068  |
| NME7      | 7.914974 | 1.989997 | 0.6826  | 2.9153  | 0.003553 | 0.024753 |
| NME9      | 3.010444 | 2.901307 | 1.13508 | 2.55604 | 0.010587 | 0.049532 |
| NMNAT2    | 179.9116 | -1.11465 | 0.30571 | -3.6461 | 0.000266 | 0.004389 |
| NNT-AS1   | 5.128369 | 3.071837 | 0.89381 | 3.4368  | 0.000589 | 0.007613 |
| NOCT      | 16.50585 | 1.439253 | 0.44785 | 3.21369 | 0.00131  | 0.012855 |
| NOG       | 5.044034 | 2.804805 | 0.90543 | 3.09777 | 0.00195  | 0.016624 |
| NOL4L     | 8.600805 | 2.014459 | 0.58386 | 3.45024 | 0.00056  | 0.00738  |
| NOTCH3    | 49.15148 | 1.25536  | 0.34649 | 3.62308 | 0.000291 | 0.004674 |
| NOTUM     | 53.90243 | 1.409501 | 0.27099 | 5.20123 | 1.98E-07 | 1.66E-05 |
| NOVA1     | 6.307037 | 4.572457 | 1.58999 | 2.87577 | 0.00403  | 0.02697  |
| NOX4      | 12.58509 | 1.866942 | 0.71719 | 2.60314 | 0.009237 | 0.045407 |
| NPAS3     | 11.07633 | 1.124812 | 0.4184  | 2.68836 | 0.00718  | 0.038325 |
| NPC2      | 111.7468 | 1.521994 | 0.20608 | 7.38536 | 1.52E-13 | 7.68E-11 |
| NPHP1     | 8.729664 | 4.734881 | 1.47172 | 3.21724 | 0.001294 | 0.012746 |
| NPNT      | 67.04931 | 3.092342 | 0.42106 | 7.34426 | 2.07E-13 | 9.84E-11 |
| NPR3      | 11.7027  | 1.68158  | 0.64128 | 2.62222 | 0.008736 | 0.043685 |
| NR2F1-AS1 | 9.329349 | 4.692137 | 1.25789 | 3.73015 | 0.000191 | 0.003505 |
| NR2F2     | 20.6154  | 1.124269 | 0.37053 | 3.03423 | 0.002412 | 0.019205 |
| NR4A3     | 14.9632  | 2.113645 | 0.55179 | 3.83052 | 0.000128 | 0.002637 |
| NRAD1     | 304.7784 | -2.4245  | 0.29328 | -8.2669 | 1.37E-16 | 1.59E-13 |
| NRAP      | 5.889383 | 4.44543  | 1.44294 | 3.08081 | 0.002064 | 0.01723  |
| NRG1      | 6.38052  | 6.086864 | 2.25444 | 2.69994 | 0.006935 | 0.037611 |
| NRGN      | 49.4471  | 1.255779 | 0.39124 | 3.20977 | 0.001328 | 0.012985 |
| NRIP1     | 730.9535 | 1.347344 | 0.24568 | 5.48423 | 4.15E-08 | 4.54E-06 |
| NRP2      | 10.37395 | 1.546465 | 0.48724 | 3.17393 | 0.001504 | 0.01407  |
| NRXN1     | 7.079679 | 3.231984 | 1.1132  | 2.90333 | 0.003692 | 0.02539  |
| NTF4      | 3.446488 | 2.69633  | 0.80346 | 3.35589 | 0.000791 | 0.009181 |
| NTM       | 2.27087  | 3.480535 | 1.31616 | 2.64447 | 0.008182 | 0.041715 |
| NTRK2     | 13.46523 | 3.437025 | 1.00085 | 3.43412 | 0.000594 | 0.007647 |

|          |          |          |         |         |          |          |
|----------|----------|----------|---------|---------|----------|----------|
| NTRK3    | 5.617479 | 5.337956 | 1.43823 | 3.71147 | 0.000206 | 0.003697 |
| NUAK1    | 16.27388 | 1.696007 | 0.53151 | 3.19089 | 0.001418 | 0.01356  |
| NUAK2    | 7.769579 | 1.644552 | 0.59244 | 2.77592 | 0.005505 | 0.032742 |
| NUDT18   | 10.96881 | 1.689571 | 0.55676 | 3.03467 | 0.002408 | 0.019205 |
| NUDT4B   | 1.77702  | -3.52837 | 1.32298 | -2.667  | 0.007654 | 0.040044 |
| NUPR1    | 22.89565 | 1.440095 | 0.40385 | 3.56596 | 0.000363 | 0.005462 |
| NXNL2    | 6.324244 | 1.683564 | 0.52997 | 3.17671 | 0.00149  | 0.013978 |
| NXPE3    | 15.47483 | 2.126071 | 0.63756 | 3.33471 | 0.000854 | 0.00956  |
| NYAP2    | 11.1029  | 4.380661 | 1.2895  | 3.39717 | 0.000681 | 0.008307 |
| OAS1     | 13.77881 | 2.108598 | 0.5817  | 3.62491 | 0.000289 | 0.004671 |
| OAS2     | 24.22548 | 1.652058 | 0.43238 | 3.82084 | 0.000133 | 0.002701 |
| OAS3     | 21.27989 | 1.819481 | 0.47992 | 3.79119 | 0.00015  | 0.002967 |
| OASL     | 8.041032 | 2.698827 | 0.72787 | 3.70785 | 0.000209 | 0.00373  |
| OAT      | 22.55032 | 1.63667  | 0.44148 | 3.70727 | 0.00021  | 0.00373  |
| OBSCN    | 48.47748 | 1.961785 | 0.39335 | 4.98738 | 6.12E-07 | 4.12E-05 |
| ODAD2    | 7.908001 | 4.231876 | 1.20168 | 3.52165 | 0.000429 | 0.006152 |
| ODC1     | 27.69818 | 1.280541 | 0.35047 | 3.65375 | 0.000258 | 0.004311 |
| ODF2L    | 16.02224 | 1.856521 | 0.66092 | 2.80899 | 0.00497  | 0.030678 |
| OFCC1    | 4.7237   | 2.224502 | 0.71399 | 3.11558 | 0.001836 | 0.015992 |
| ONECUT2  | 7.346553 | 4.364169 | 1.33854 | 3.26039 | 0.001113 | 0.011471 |
| OPN5     | 13.40171 | 3.859228 | 1.26349 | 3.05441 | 0.002255 | 0.018383 |
| OPRK1    | 40.84481 | -1.19107 | 0.28968 | -4.1117 | 3.93E-05 | 0.001074 |
| OPRM1    | 9.509112 | 4.092232 | 1.42933 | 2.86305 | 0.004196 | 0.027631 |
| OR2C3    | 2.170842 | 3.862821 | 1.46335 | 2.63971 | 0.008298 | 0.042066 |
| OR2T8    | 8.098677 | 1.973219 | 0.71024 | 2.77823 | 0.005466 | 0.032606 |
| OR4F13P  | 2.096079 | 4.348494 | 1.51385 | 2.87247 | 0.004073 | 0.027132 |
| OR4K2    | 2.936885 | 4.912465 | 1.71925 | 2.85732 | 0.004272 | 0.027879 |
| OR52N4   | 4.035547 | 5.395218 | 1.74875 | 3.08519 | 0.002034 | 0.01704  |
| OR7D2    | 4.046789 | 2.710278 | 1.05822 | 2.56118 | 0.010432 | 0.049141 |
| OTOA     | 3.271295 | 5.077674 | 1.96852 | 2.57944 | 0.009896 | 0.047362 |
| OTOL1    | 3.153762 | 4.998944 | 1.51039 | 3.3097  | 0.000934 | 0.010168 |
| OTULINL  | 7.210846 | 2.721233 | 0.98353 | 2.7668  | 0.005661 | 0.033293 |
| OVCH1    | 6.545085 | 3.567047 | 1.38155 | 2.58191 | 0.009825 | 0.04717  |
| P2RX7    | 6.810749 | 2.300979 | 0.84495 | 2.72322 | 0.006465 | 0.036035 |
| P2RY14   | 3.032537 | 3.334511 | 1.15474 | 2.88767 | 0.003881 | 0.026253 |
| P4HA1    | 56.07872 | 1.431445 | 0.28067 | 5.10012 | 3.39E-07 | 2.56E-05 |
| PABPC1P2 | 3.769737 | 4.752647 | 1.48111 | 3.20883 | 0.001333 | 0.013011 |
| PABPC4L  | 3.643757 | 4.741836 | 1.57982 | 3.00151 | 0.002686 | 0.020542 |
| PACRG    | 10.66234 | 4.137563 | 1.40416 | 2.94665 | 0.003212 | 0.023195 |
| PADI1    | 5.083762 | 5.203282 | 1.0668  | 4.87746 | 1.07E-06 | 6.48E-05 |
| PADI4    | 5.988691 | 1.86575  | 0.69226 | 2.69517 | 0.007035 | 0.037887 |
| PAEP     | 25.27203 | 2.025145 | 0.76694 | 2.64056 | 0.008277 | 0.042    |
| PAK6     | 115.0921 | 1.203486 | 0.23982 | 5.0183  | 5.21E-07 | 3.66E-05 |
| PAK6-AS1 | 15.42342 | 1.482746 | 0.54277 | 2.73182 | 0.006299 | 0.035552 |

|            |          |          |         |         |          |          |
|------------|----------|----------|---------|---------|----------|----------|
| PALD1      | 5.098899 | 3.213418 | 0.94809 | 3.38937 | 0.000701 | 0.008421 |
| PALM       | 4.633315 | 1.990542 | 0.69782 | 2.85253 | 0.004337 | 0.028116 |
| PAMR1      | 5.376805 | 2.679766 | 1.031   | 2.59918 | 0.009345 | 0.045753 |
| PAPPA2     | 27153.73 | 2.138789 | 0.29074 | 7.35629 | 1.89E-13 | 9.26E-11 |
| PAPSS2     | 51.60635 | 1.088532 | 0.42595 | 2.55552 | 0.010603 | 0.049568 |
| PARD3B     | 18.0071  | 1.530349 | 0.55579 | 2.75347 | 0.005897 | 0.034087 |
| PARP9      | 53.98742 | 1.032396 | 0.40385 | 2.55639 | 0.010577 | 0.049505 |
| PARPBP     | 11.8936  | 1.571376 | 0.58107 | 2.70427 | 0.006846 | 0.037351 |
| PART1      | 5.197207 | 5.236807 | 1.50537 | 3.47875 | 0.000504 | 0.006873 |
| PARVB      | 9.971729 | 1.909379 | 0.58747 | 3.25015 | 0.001153 | 0.011743 |
| PARVG      | 8.058298 | 2.045043 | 0.7319  | 2.79414 | 0.005204 | 0.03154  |
| PASK       | 7.017456 | 1.81505  | 0.51184 | 3.54611 | 0.000391 | 0.005772 |
| PATJ       | 30.99512 | 1.825253 | 0.47721 | 3.82486 | 0.000131 | 0.002664 |
| PAX6       | 6.749808 | 3.496018 | 1.1839  | 2.95296 | 0.003147 | 0.022911 |
| PCA3       | 3.932837 | 5.335376 | 1.75831 | 3.03437 | 0.00241  | 0.019205 |
| PCAT4      | 3.35005  | 5.125754 | 1.97442 | 2.59608 | 0.009429 | 0.045954 |
| PCDH17     | 5.966787 | 3.37838  | 1.09458 | 3.08646 | 0.002026 | 0.017021 |
| PCDH20     | 4.283567 | 3.988637 | 1.4665  | 2.71983 | 0.006532 | 0.036225 |
| PCDH7      | 6.594574 | 4.361695 | 1.45471 | 2.99832 | 0.002715 | 0.020683 |
| PCDH9      | 17.04154 | 5.062861 | 1.64211 | 3.08315 | 0.002048 | 0.01714  |
| PCDHB4     | 4.01396  | 4.854373 | 1.67096 | 2.90514 | 0.003671 | 0.025293 |
| PCED1B-AS1 | 4.771878 | 3.254989 | 1.08951 | 2.98758 | 0.002812 | 0.021204 |
| PCGF2      | 7.856184 | 5.416426 | 1.5577  | 3.4772  | 0.000507 | 0.006905 |
| PCLAF      | 4.143613 | 3.948059 | 1.36731 | 2.88747 | 0.003884 | 0.026254 |
| PCNX2      | 8.079166 | 2.0194   | 0.68595 | 2.94396 | 0.00324  | 0.023335 |
| PCSK1      | 5.487682 | 4.360526 | 1.4208  | 3.06907 | 0.002147 | 0.017739 |
| PCSK5      | 10.33795 | 2.239333 | 0.7464  | 3.00019 | 0.002698 | 0.020595 |
| PCYT1B     | 4.701302 | 3.593261 | 1.09376 | 3.28525 | 0.001019 | 0.010774 |
| PDE11A     | 8.54541  | 4.525148 | 1.57982 | 2.86434 | 0.004179 | 0.027575 |
| PDE1A      | 11.07611 | 2.990238 | 1.02965 | 2.90414 | 0.003683 | 0.025346 |
| PDE1C      | 12.67076 | 2.711502 | 0.91392 | 2.96688 | 0.003008 | 0.022259 |
| PDE2A      | 8.597747 | 1.96114  | 0.66144 | 2.96496 | 0.003027 | 0.022347 |
| PDE3A      | 18.80652 | 1.770042 | 0.64437 | 2.74693 | 0.006016 | 0.034488 |
| PDE4B      | 13.15515 | 1.362779 | 0.51368 | 2.65296 | 0.007979 | 0.041181 |
| PDE7B      | 35.14439 | -1.18531 | 0.39265 | -3.0188 | 0.002538 | 0.019864 |
| PDGFC      | 8.78955  | 2.124836 | 0.7627  | 2.78595 | 0.005337 | 0.032089 |
| PDGFD      | 25.10977 | -1.52095 | 0.57844 | -2.6294 | 0.008554 | 0.043013 |
| PDGFRA     | 19.42569 | 1.328405 | 0.45477 | 2.92103 | 0.003489 | 0.024396 |
| PDGFRB     | 15.79253 | 1.100609 | 0.39302 | 2.80041 | 0.005104 | 0.03116  |
| PDLIM1     | 48.44265 | 1.023351 | 0.32798 | 3.12018 | 0.001807 | 0.015829 |
| PDZD7      | 7.828836 | 2.875385 | 0.76598 | 3.75385 | 0.000174 | 0.003304 |
| PDZK1IP1   | 11.99686 | 2.916537 | 0.881   | 3.31049 | 0.000931 | 0.010153 |
| PDZRN3     | 5.376482 | 4.768675 | 1.303   | 3.65976 | 0.000252 | 0.004247 |
| PECR       | 3.093264 | 3.973284 | 1.53941 | 2.58104 | 0.00985  | 0.047249 |

|         |          |          |         |         |          |          |
|---------|----------|----------|---------|---------|----------|----------|
| PEG3    | 984.3419 | 1.009573 | 0.28462 | 3.5471  | 0.000389 | 0.005761 |
| PENK    | 5.118069 | 2.653122 | 0.84034 | 3.1572  | 0.001593 | 0.014624 |
| PEX5L   | 9.804773 | 5.261446 | 1.88419 | 2.79242 | 0.005232 | 0.031654 |
| PFKFB3  | 14.09291 | 2.172887 | 0.63745 | 3.40872 | 0.000653 | 0.008127 |
| PFKP    | 17.6939  | 2.820288 | 0.47793 | 5.90106 | 3.61E-09 | 5.51E-07 |
| PGLYRP4 | 5.935947 | 2.795033 | 1.02092 | 2.73776 | 0.006186 | 0.035115 |
| PGM5    | 11.24293 | 1.891076 | 0.59108 | 3.19938 | 0.001377 | 0.013317 |
| PGM5P2  | 5.282155 | 3.836741 | 1.38738 | 2.76546 | 0.005684 | 0.033381 |
| PGR     | 14.55836 | 2.782642 | 0.99549 | 2.79526 | 0.005186 | 0.031471 |
| PGR-AS1 | 2.1865   | 3.887092 | 1.50317 | 2.58593 | 0.009712 | 0.046809 |
| PHACTR1 | 8.175222 | 2.975981 | 0.92598 | 3.21388 | 0.00131  | 0.012855 |
| PHLDA1  | 11.10914 | 1.762908 | 0.62345 | 2.82767 | 0.004689 | 0.02953  |
| PHYHIP  | 82.71852 | 1.702091 | 0.3585  | 4.74776 | 2.06E-06 | 0.000109 |
| PIEZO1  | 16.90685 | 1.099612 | 0.40425 | 2.7201  | 0.006526 | 0.036216 |
| PIEZO2  | 8.106996 | 3.064427 | 0.92643 | 3.30776 | 0.00094  | 0.010231 |
| PIK3AP1 | 994.4816 | 1.016166 | 0.17872 | 5.68592 | 1.30E-08 | 1.70E-06 |
| PIK3CG  | 10.69615 | 1.526554 | 0.55207 | 2.76513 | 0.00569  | 0.033387 |
| PIK3R1  | 554.1167 | 1.094988 | 0.25915 | 4.22537 | 2.39E-05 | 0.00074  |
| PIK3R6  | 3.764144 | 3.249665 | 1.20746 | 2.69132 | 0.007117 | 0.038158 |
| PIM2    | 7.616473 | 1.739905 | 0.66327 | 2.62324 | 0.00871  | 0.043582 |
| PITPNC1 | 11.41648 | 1.486629 | 0.53411 | 2.78337 | 0.00538  | 0.032297 |
| PITPNM1 | 36.46578 | 1.062814 | 0.32643 | 3.25589 | 0.00113  | 0.011603 |
| PITPNM3 | 3.848299 | 2.68072  | 0.89546 | 2.99366 | 0.002757 | 0.020889 |
| PIWIL3  | 4.338507 | 2.628934 | 0.99176 | 2.65078 | 0.008031 | 0.041321 |
| PKD1L2  | 8.427384 | 2.512887 | 0.61604 | 4.0791  | 4.52E-05 | 0.001208 |
| PKDCC   | 2.542693 | 3.590051 | 1.19993 | 2.99189 | 0.002773 | 0.020955 |
| PKHD1L1 | 35.17539 | 2.770429 | 0.6869  | 4.03325 | 5.50E-05 | 0.001409 |
| PKM     | 915.3798 | 1.118159 | 0.1708  | 6.54675 | 5.88E-11 | 1.90E-08 |
| PKP4    | 15.0774  | 1.91373  | 0.70844 | 2.70134 | 0.006906 | 0.037572 |
| PLA2G15 | 9.996864 | 1.555318 | 0.41681 | 3.73147 | 0.00019  | 0.003496 |
| PLA2G2F | 36.69161 | 1.205623 | 0.39049 | 3.08743 | 0.002019 | 0.017009 |
| PLA2G4A | 8.603194 | 5.485807 | 1.29112 | 4.24888 | 2.15E-05 | 0.000678 |
| PLAAT4  | 53.0391  | 1.18243  | 0.40068 | 2.95108 | 0.003167 | 0.02302  |
| PLAC8   | 33.31315 | 1.7857   | 0.30418 | 5.87048 | 4.35E-09 | 6.39E-07 |
| PLAGL1  | 15.59691 | 1.242424 | 0.47491 | 2.6161  | 0.008894 | 0.044298 |
| PLCB4   | 11.14938 | 2.921834 | 0.79405 | 3.67966 | 0.000234 | 0.00403  |
| PLCG2   | 24.80373 | 1.313361 | 0.45548 | 2.88349 | 0.003933 | 0.026482 |
| PLCH1   | 9.124672 | 3.037479 | 0.96813 | 3.13748 | 0.001704 | 0.015272 |
| PLCL1   | 12.35351 | 3.926643 | 1.08615 | 3.61519 | 0.0003   | 0.004766 |
| PLCXD3  | 6.808849 | 4.193477 | 1.13064 | 3.70893 | 0.000208 | 0.00372  |
| PLCZ1   | 9.735268 | 4.283165 | 1.26097 | 3.39671 | 0.000682 | 0.008307 |
| PLEC    | 712.9079 | 1.097405 | 0.2055  | 5.34021 | 9.28E-08 | 9.04E-06 |
| PLEK    | 39.67222 | 1.465165 | 0.49786 | 2.9429  | 0.003252 | 0.023363 |
| PLEKHA2 | 157.2923 | 2.943838 | 0.32835 | 8.96556 | 3.09E-19 | 4.54E-16 |

|          |          |          |         |         |          |          |
|----------|----------|----------|---------|---------|----------|----------|
| PLEKHH2  | 7.171621 | 2.921407 | 0.84242 | 3.46789 | 0.000525 | 0.007032 |
| PLEKHO1  | 17.14807 | 1.320782 | 0.45256 | 2.91847 | 0.003517 | 0.024533 |
| PLEKHS1  | 3.172761 | 4.516461 | 1.60002 | 2.82275 | 0.004761 | 0.029801 |
| PLG      | 3.490838 | 5.158994 | 1.74744 | 2.95232 | 0.003154 | 0.022948 |
| PLOD2    | 68.91044 | 2.166466 | 0.33158 | 6.53374 | 6.41E-11 | 1.99E-08 |
| PLPP2    | 25.52081 | -1.72901 | 0.63286 | -2.7321 | 0.006294 | 0.03554  |
| PLPPR4   | 6.080394 | 3.690311 | 1.41697 | 2.60438 | 0.009204 | 0.045312 |
| PLPPR5   | 5.049771 | 4.677298 | 1.43951 | 3.24923 | 0.001157 | 0.011766 |
| PLS3     | 15.12993 | 1.567795 | 0.47523 | 3.29905 | 0.00097  | 0.010414 |
| PLSCR2   | 7.364902 | 3.235218 | 1.01118 | 3.19944 | 0.001377 | 0.013317 |
| PLTP     | 10.54458 | 1.701594 | 0.56038 | 3.0365  | 0.002393 | 0.019137 |
| PLXNA4   | 8.280184 | 2.876834 | 1.06533 | 2.70041 | 0.006925 | 0.037605 |
| PMAIP1   | 38.27512 | -1.69834 | 0.31416 | -5.406  | 6.45E-08 | 6.59E-06 |
| PMEL     | 12.1019  | 1.499691 | 0.42905 | 3.49541 | 0.000473 | 0.006557 |
| PMEPA1   | 5.358096 | 2.824267 | 0.73194 | 3.85862 | 0.000114 | 0.002416 |
| PMP2     | 4.597097 | 5.066273 | 1.68167 | 3.01265 | 0.00259  | 0.020084 |
| PNCK     | 8.602167 | 2.622888 | 0.52655 | 4.9813  | 6.32E-07 | 4.18E-05 |
| PNMA5    | 3.882685 | 3.856171 | 1.45644 | 2.64766 | 0.008105 | 0.041517 |
| POLQ     | 13.4167  | 2.731999 | 0.80118 | 3.40997 | 0.00065  | 0.008126 |
| POLR3GL  | 4.076088 | 2.760596 | 0.89432 | 3.0868  | 0.002023 | 0.017019 |
| POSTN    | 646.5099 | -1.49765 | 0.31257 | -4.7913 | 1.66E-06 | 9.02E-05 |
| POT1-AS1 | 6.195281 | 3.130823 | 1.1156  | 2.80639 | 0.00501  | 0.030819 |
| POTEC    | 5.693893 | 4.402229 | 1.54685 | 2.84593 | 0.004428 | 0.028534 |
| POTEH    | 3.093106 | 4.965885 | 1.59415 | 3.11506 | 0.001839 | 0.016011 |
| PPARGC1A | 9.132056 | 3.334384 | 1.21292 | 2.74907 | 0.005977 | 0.034385 |
| PPFIA3   | 7.351738 | 2.433837 | 0.67213 | 3.62106 | 0.000293 | 0.004692 |
| PPFIBP1  | 94.67883 | 1.395497 | 0.30401 | 4.59025 | 4.43E-06 | 0.000199 |
| PPFIBP2  | 9.233009 | 2.844032 | 0.77263 | 3.681   | 0.000232 | 0.004013 |
| PPIA     | 161.7193 | 1.269024 | 0.2616  | 4.85102 | 1.23E-06 | 7.22E-05 |
| PPIAP46  | 93.25738 | 4.715252 | 0.7556  | 6.24037 | 4.37E-10 | 8.82E-08 |
| PPL      | 218.0468 | 1.050356 | 0.26569 | 3.95327 | 7.71E-05 | 0.001843 |
| PPM1E    | 4.039344 | 4.876977 | 1.57877 | 3.08911 | 0.002008 | 0.016962 |
| PPM1F    | 47.11769 | 1.070142 | 0.30964 | 3.45612 | 0.000548 | 0.007244 |
| PPM1K    | 12.78084 | 1.734143 | 0.51552 | 3.36388 | 0.000769 | 0.008997 |
| PPP1R12C | 332.0576 | 1.125874 | 0.17449 | 6.45226 | 1.10E-10 | 3.18E-08 |
| PPP1R1C  | 19.83812 | 2.78247  | 0.53513 | 5.19957 | 2.00E-07 | 1.66E-05 |
| PPP1R3A  | 3.561912 | 5.204245 | 2.03009 | 2.56355 | 0.010361 | 0.048949 |
| PPP2R2B  | 15.50607 | 1.175147 | 0.46081 | 2.55015 | 0.010768 | 0.049959 |
| PREX1    | 55.0214  | 1.209596 | 0.32946 | 3.67141 | 0.000241 | 0.004122 |
| PREX2    | 14.4593  | 1.915221 | 0.73505 | 2.60556 | 0.009173 | 0.045214 |
| PRG2     | 399.4885 | 1.461073 | 0.24467 | 5.97156 | 2.35E-09 | 4.04E-07 |
| PRICKLE2 | 8.716231 | 2.287487 | 0.73668 | 3.10511 | 0.001902 | 0.016367 |
| PRKAA2   | 29.92854 | 1.28386  | 0.42891 | 2.99329 | 0.00276  | 0.020889 |
| PRKAB2   | 70.45851 | 1.662048 | 0.33218 | 5.00346 | 5.63E-07 | 3.84E-05 |

|         |          |          |         |         |          |          |
|---------|----------|----------|---------|---------|----------|----------|
| PRKCB   | 21.84467 | 1.389875 | 0.49171 | 2.82662 | 0.004704 | 0.029562 |
| PRKD1   | 8.770402 | 3.074584 | 1.11017 | 2.76947 | 0.005615 | 0.033105 |
| PRKD3   | 276.3484 | 2.467623 | 0.24659 | 10.0071 | 1.42E-23 | 3.82E-20 |
| PRKX    | 18.81349 | 2.046351 | 0.57658 | 3.54914 | 0.000386 | 0.005738 |
| PRKXP1  | 4.112019 | 2.604876 | 0.87795 | 2.96699 | 0.003007 | 0.022259 |
| PRNCR1  | 9.190276 | 2.970347 | 1.02757 | 2.89066 | 0.003844 | 0.026158 |
| PROS1   | 13.67791 | 2.158294 | 0.68727 | 3.14037 | 0.001687 | 0.015189 |
| PROSER2 | 5.062348 | 3.27213  | 0.74652 | 4.38319 | 1.17E-05 | 0.000433 |
| PROX1   | 15.89483 | 2.745136 | 0.67964 | 4.03911 | 5.37E-05 | 0.001377 |
| PRPS2   | 3.955121 | 2.356337 | 0.88929 | 2.64968 | 0.008057 | 0.041403 |
| PRR16   | 2.362564 | 4.028065 | 1.49429 | 2.69563 | 0.007026 | 0.037873 |
| PRRX1   | 5.802571 | 3.954871 | 0.90487 | 4.37066 | 1.24E-05 | 0.000454 |
| PRSS12  | 17.7097  | 2.732202 | 0.73805 | 3.70191 | 0.000214 | 0.003802 |
| PRSS22  | 4.3997   | 4.544924 | 1.35228 | 3.36092 | 0.000777 | 0.009074 |
| PRXL2A  | 206.3681 | -1.62274 | 0.34849 | -4.6565 | 3.22E-06 | 0.000153 |
| PTCH1   | 11.06795 | 2.023784 | 0.63147 | 3.20486 | 0.001351 | 0.013145 |
| PTGDS   | 4.721657 | 1.866221 | 0.72828 | 2.56249 | 0.010392 | 0.048998 |
| PTGER3  | 11.85413 | 3.183397 | 0.91767 | 3.46901 | 0.000522 | 0.007015 |
| PTGER4  | 4.687099 | 5.055131 | 1.32056 | 3.82803 | 0.000129 | 0.002647 |
| PTGIS   | 6.213162 | 2.98132  | 0.85692 | 3.47911 | 0.000503 | 0.006869 |
| PTGS1   | 42.4539  | 1.531488 | 0.46473 | 3.29543 | 0.000983 | 0.010508 |
| PTK2B   | 24.80955 | 1.500699 | 0.43278 | 3.46754 | 0.000525 | 0.007035 |
| PTPDC1  | 5.831923 | 2.515398 | 0.80213 | 3.13588 | 0.001713 | 0.015304 |
| PTPN13  | 22.42715 | 2.679979 | 0.56686 | 4.72772 | 2.27E-06 | 0.000117 |
| PTPN22  | 9.352291 | 2.49848  | 0.83589 | 2.98902 | 0.002799 | 0.021114 |
| PTPRC   | 16.62286 | 3.266308 | 0.75851 | 4.30621 | 1.66E-05 | 0.000561 |
| PTPRD   | 16.3082  | 2.986114 | 0.98372 | 3.03552 | 0.002401 | 0.01918  |
| PTPRE   | 13.79282 | 1.561    | 0.45397 | 3.43856 | 0.000585 | 0.007582 |
| PTPRO   | 8.393684 | 2.787679 | 1.03123 | 2.70327 | 0.006866 | 0.037401 |
| PTPRQ   | 68.73009 | -1.10794 | 0.36279 | -3.054  | 0.002258 | 0.018383 |
| PTPRR   | 23.17541 | 2.178008 | 0.59896 | 3.63635 | 0.000277 | 0.00452  |
| PTPRT   | 6.33228  | 3.4819   | 1.27236 | 2.73658 | 0.006208 | 0.035192 |
| PTPRU   | 53.88856 | 1.49341  | 0.26829 | 5.56639 | 2.60E-08 | 3.14E-06 |
| PTPRZ1  | 11.82196 | 3.806351 | 1.25343 | 3.03676 | 0.002391 | 0.019137 |
| PTTG1   | 5.794294 | 3.348629 | 0.92392 | 3.62439 | 0.00029  | 0.004671 |
| PWAR5   | 6.94688  | 4.321599 | 1.55478 | 2.77955 | 0.005443 | 0.032546 |
| PWRN2   | 4.205976 | 4.939381 | 1.93246 | 2.556   | 0.010588 | 0.049532 |
| PXDNL   | 8.090205 | 2.173553 | 0.79674 | 2.72805 | 0.006371 | 0.035764 |
| PZP     | 8.541436 | 4.302352 | 1.48833 | 2.89072 | 0.003844 | 0.026158 |
| QPCT    | 14.62164 | 2.59719  | 0.53929 | 4.8159  | 1.47E-06 | 8.28E-05 |
| QSOX1   | 476.4613 | 1.362913 | 0.28311 | 4.81399 | 1.48E-06 | 8.33E-05 |
| RAB17   | 29.64211 | 1.227698 | 0.47258 | 2.59786 | 0.009381 | 0.045832 |
| RAB39A  | 16.74104 | -1.29053 | 0.43793 | -2.9469 | 0.00321  | 0.023195 |
| RAB9B   | 2.156269 | 3.002278 | 1.1039  | 2.7197  | 0.006534 | 0.036226 |



|          |          |          |         |         |          |          |
|----------|----------|----------|---------|---------|----------|----------|
| RAC2     | 18.815   | 1.388071 | 0.50907 | 2.72667 | 0.006398 | 0.035833 |
| RACGAP1  | 25.78922 | 1.970888 | 0.49466 | 3.98432 | 6.77E-05 | 0.00167  |
| RAD21L1  | 5.136306 | 4.249229 | 1.53754 | 2.76366 | 0.005716 | 0.033477 |
| RAD51AP2 | 2.870444 | 4.347212 | 1.66027 | 2.61838 | 0.008835 | 0.044071 |
| RAD54L   | 2.608709 | 4.20157  | 1.59226 | 2.63874 | 0.008321 | 0.042134 |
| RAI2     | 3.813563 | 2.590268 | 0.93463 | 2.77143 | 0.005581 | 0.032991 |
| RALYL    | 5.485814 | 5.829503 | 1.56232 | 3.73131 | 0.00019  | 0.003496 |
| RAPGEF4  | 7.569954 | 3.369089 | 1.03098 | 3.26784 | 0.001084 | 0.011246 |
| RAPH1    | 198.8385 | -1.05166 | 0.18963 | -5.546  | 2.92E-08 | 3.42E-06 |
| RARRES1  | 13.2933  | 5.35016  | 1.01246 | 5.28431 | 1.26E-07 | 1.15E-05 |
| RASA3    | 17.92886 | 1.704066 | 0.5233  | 3.25636 | 0.001128 | 0.011597 |
| RASAL1   | 4.302299 | 3.231354 | 1.00588 | 3.21247 | 0.001316 | 0.012894 |
| RASAL3   | 4.352515 | 1.839812 | 0.68607 | 2.68165 | 0.007326 | 0.03887  |
| RASEF    | 153.4854 | 2.441527 | 0.31039 | 7.86607 | 3.66E-15 | 3.29E-12 |
| RASGRF2  | 39.22902 | 1.68015  | 0.40641 | 4.13417 | 3.56E-05 | 0.001005 |
| RASL11B  | 67.02415 | -1.13493 | 0.30596 | -3.7094 | 0.000208 | 0.00372  |
| RASSF3   | 89.68101 | 1.244456 | 0.26432 | 4.70809 | 2.50E-06 | 0.000126 |
| RASSF5   | 17.41398 | 1.672533 | 0.54961 | 3.04315 | 0.002341 | 0.018858 |
| RASSF9   | 8.757628 | 2.643131 | 0.89381 | 2.95715 | 0.003105 | 0.022703 |
| RBM44    | 4.930227 | 4.17999  | 1.38942 | 3.00845 | 0.002626 | 0.020235 |
| RBM46    | 3.333396 | 3.557102 | 1.30835 | 2.71876 | 0.006553 | 0.036268 |
| RBP1     | 5.260155 | 2.240289 | 0.72874 | 3.07421 | 0.002111 | 0.01758  |
| RCAN1    | 153.4758 | -1.87773 | 0.30708 | -6.1148 | 9.67E-10 | 1.78E-07 |
| RCOR2    | 3.393006 | 2.126375 | 0.83261 | 2.55387 | 0.010653 | 0.049592 |
| RCSD1    | 12.64152 | 1.677493 | 0.54861 | 3.05771 | 0.00223  | 0.01823  |
| RDH16    | 3.481269 | 2.778698 | 0.9661  | 2.87621 | 0.004025 | 0.026944 |
| RELN     | 17.52664 | 3.114599 | 1.00149 | 3.10997 | 0.001871 | 0.016193 |
| RELT     | 14.41356 | 1.392324 | 0.50338 | 2.76593 | 0.005676 | 0.033351 |
| REXO5    | 3.955229 | 2.409286 | 0.87648 | 2.74882 | 0.005981 | 0.034396 |
| RFLNB    | 13.03551 | 1.659564 | 0.42535 | 3.90168 | 9.55E-05 | 0.002145 |
| RFX6     | 4.730309 | 3.65556  | 1.39982 | 2.61146 | 0.009016 | 0.044738 |
| RGN      | 2.872184 | 3.741123 | 1.32231 | 2.82924 | 0.004666 | 0.029501 |
| RGPD4    | 7.934326 | 1.525781 | 0.58528 | 2.60692 | 0.009136 | 0.045142 |
| RGS16    | 13.23626 | 2.227405 | 0.71381 | 3.12046 | 0.001806 | 0.015825 |
| RGS22    | 9.717625 | 3.430985 | 0.90932 | 3.77313 | 0.000161 | 0.003129 |
| RGS3     | 20.46555 | 1.449269 | 0.42139 | 3.43928 | 0.000583 | 0.007576 |
| RGS5-AS1 | 5.736195 | 5.396123 | 1.63446 | 3.30148 | 0.000962 | 0.010352 |
| RGS8     | 2.014196 | 4.417522 | 1.69949 | 2.59932 | 0.009341 | 0.045748 |
| RGS9     | 2.742918 | 3.125954 | 1.20122 | 2.60233 | 0.009259 | 0.045472 |
| RGSL1    | 4.409251 | 5.49341  | 1.60131 | 3.43057 | 0.000602 | 0.007698 |
| RHOF     | 51.96317 | 1.888065 | 0.37081 | 5.09167 | 3.55E-07 | 2.66E-05 |
| RHOH     | 6.613849 | 2.686904 | 1.00547 | 2.67227 | 0.007534 | 0.039661 |
| RHPN2    | 15.96993 | 1.120708 | 0.3909  | 2.86699 | 0.004144 | 0.027401 |
| RIMS1    | 14.71241 | 3.735076 | 1.07638 | 3.47005 | 0.00052  | 0.007011 |

|          |          |          |         |         |          |          |
|----------|----------|----------|---------|---------|----------|----------|
| RIMS2    | 18.72993 | 4.608153 | 1.14894 | 4.01079 | 6.05E-05 | 0.001522 |
| RIMS3    | 2.766517 | 2.822743 | 0.98184 | 2.87495 | 0.004041 | 0.027006 |
| RIPOR1   | 13.03428 | 1.666217 | 0.39492 | 4.21917 | 2.45E-05 | 0.000748 |
| RIT2     | 5.35142  | 3.418491 | 1.33384 | 2.56289 | 0.01038  | 0.048983 |
| RNASE11  | 18.86758 | -2.61177 | 0.47935 | -5.4485 | 5.08E-08 | 5.40E-06 |
| RNASEH2C | 75.36976 | 1.108121 | 0.26282 | 4.2163  | 2.48E-05 | 0.000753 |
| RNF112   | 2.313441 | 3.931952 | 1.1531  | 3.40989 | 0.00065  | 0.008126 |
| RNF125   | 7.373518 | 2.618144 | 0.82361 | 3.17885 | 0.001479 | 0.013914 |
| RNF144B  | 25.56625 | 1.305412 | 0.44044 | 2.96388 | 0.003038 | 0.022385 |
| RNF150   | 9.224953 | 3.631228 | 1.14278 | 3.17753 | 0.001485 | 0.013962 |
| RNF152   | 75.6058  | -1.66535 | 0.34458 | -4.833  | 1.35E-06 | 7.82E-05 |
| RNF165   | 4.215042 | 4.425453 | 1.70933 | 2.589   | 0.009626 | 0.046546 |
| RNF17    | 11.86902 | 4.015558 | 1.14403 | 3.51001 | 0.000448 | 0.00631  |
| RNF175   | 4.558903 | 4.545421 | 1.7751  | 2.56065 | 0.010448 | 0.049187 |
| RNF180   | 8.926644 | 4.554576 | 1.23222 | 3.69623 | 0.000219 | 0.003845 |
| RNF212   | 2.103865 | 4.373516 | 1.58938 | 2.75172 | 0.005928 | 0.034193 |
| RNF212B  | 3.245746 | 4.021686 | 1.56751 | 2.56566 | 0.010298 | 0.048767 |
| RNF222   | 3.431679 | 3.649456 | 1.12132 | 3.25459 | 0.001136 | 0.011634 |
| RNF32-DT | 2.140703 | 4.430234 | 1.53118 | 2.89335 | 0.003812 | 0.026    |
| RNFT1    | 8.661801 | 1.685844 | 0.61316 | 2.74942 | 0.00597  | 0.03436  |
| RNR1     | 422187.9 | 1.111406 | 0.41576 | 2.67322 | 0.007513 | 0.039576 |
| ROBO1    | 13.53722 | 3.046221 | 1.00217 | 3.03963 | 0.002369 | 0.019008 |
| ROBO2    | 18.00084 | 4.461131 | 1.07854 | 4.13627 | 3.53E-05 | 0.000999 |
| RORB     | 8.709984 | 3.033972 | 0.70582 | 4.29853 | 1.72E-05 | 0.000577 |
| ROS1     | 14.879   | 4.08702  | 1.07863 | 3.78909 | 0.000151 | 0.002985 |
| RPE65    | 2.700584 | 4.777205 | 1.75563 | 2.72108 | 0.006507 | 0.036151 |
| RPGRIP1L | 12.32938 | 2.693275 | 0.79897 | 3.37091 | 0.000749 | 0.008835 |
| RPS16P5  | 2.108915 | 3.895623 | 1.43015 | 2.72393 | 0.006451 | 0.036    |
| RPS6KA2  | 16.34885 | 1.586027 | 0.50044 | 3.16927 | 0.001528 | 0.014213 |
| RPS6KA4  | 40.06491 | 1.233367 | 0.30668 | 4.02168 | 5.78E-05 | 0.00146  |
| RRAS2    | 854.116  | -1.09274 | 0.16607 | -6.58   | 4.71E-11 | 1.56E-08 |
| RRM2     | 9.053393 | 2.914337 | 0.74901 | 3.89089 | 9.99E-05 | 0.002188 |
| RRN3P1   | 2.721311 | 4.745868 | 1.25861 | 3.77073 | 0.000163 | 0.003152 |
| RSAD2    | 16.32436 | 1.400309 | 0.49012 | 2.85707 | 0.004276 | 0.027879 |
| RTKN2    | 13.55464 | 3.426555 | 1.03352 | 3.31542 | 0.000915 | 0.010016 |
| RTL6     | 12.01932 | 1.489894 | 0.5342  | 2.78904 | 0.005286 | 0.03189  |
| RUBCNL   | 4.257209 | 3.422134 | 1.20569 | 2.83831 | 0.004535 | 0.028969 |
| RUNX1    | 16.56067 | 2.116899 | 0.59501 | 3.55775 | 0.000374 | 0.005605 |
| RUNX1T1  | 11.00092 | 2.516559 | 0.95072 | 2.647   | 0.008121 | 0.041551 |
| RUNX3    | 7.754004 | 1.908243 | 0.74712 | 2.55414 | 0.010645 | 0.049588 |
| RUSC2    | 60.9638  | 1.558012 | 0.24871 | 6.26446 | 3.74E-10 | 7.96E-08 |
| RXFP1    | 10.63042 | 2.236407 | 0.80719 | 2.77061 | 0.005595 | 0.033037 |
| RYR1     | 7.472713 | 2.772008 | 1.01153 | 2.74041 | 0.006136 | 0.034932 |
| RYR2     | 42.65436 | 1.972152 | 0.66715 | 2.95608 | 0.003116 | 0.022752 |

|            |          |          |         |         |          |          |
|------------|----------|----------|---------|---------|----------|----------|
| RYR3       | 14.26909 | 3.080479 | 0.97971 | 3.14426 | 0.001665 | 0.015044 |
| S100A4     | 53.77877 | 1.782519 | 0.43237 | 4.12267 | 3.75E-05 | 0.00104  |
| S1PR2      | 11.97063 | 2.211558 | 0.54278 | 4.07448 | 4.61E-05 | 0.001224 |
| SACS       | 11.04925 | 2.785851 | 0.77953 | 3.57375 | 0.000352 | 0.005347 |
| SALL4      | 5.068402 | 4.731126 | 1.63498 | 2.89369 | 0.003807 | 0.025984 |
| SAMD13     | 3.942599 | 3.814269 | 1.27913 | 2.98193 | 0.002864 | 0.021469 |
| SAMD3      | 6.661552 | 2.284739 | 0.88374 | 2.58531 | 0.009729 | 0.046854 |
| SAMD4A     | 114.1948 | 1.232929 | 0.33868 | 3.64041 | 0.000272 | 0.004468 |
| SAMD5      | 8.353738 | 2.576391 | 1.00828 | 2.55524 | 0.010611 | 0.049568 |
| SAMD9      | 18.57643 | 1.289221 | 0.48982 | 2.63202 | 0.008488 | 0.042776 |
| SAMSN1     | 6.59837  | 2.947731 | 0.82404 | 3.57719 | 0.000347 | 0.005302 |
| SAP30L-AS1 | 3.116868 | 4.96806  | 1.55389 | 3.19717 | 0.001388 | 0.013379 |
| SASH1      | 753.7976 | 2.789537 | 0.27865 | 10.0109 | 1.37E-23 | 3.82E-20 |
| SATB1      | 18.71081 | 1.745664 | 0.62219 | 2.80569 | 0.005021 | 0.030864 |
| SATB2      | 37.58051 | 1.260396 | 0.30281 | 4.16236 | 3.15E-05 | 0.000913 |
| SAXO2      | 3.586108 | 3.285338 | 1.19776 | 2.7429  | 0.00609  | 0.034778 |
| SCD        | 29.82578 | 1.885305 | 0.36108 | 5.22128 | 1.78E-07 | 1.53E-05 |
| SCEL       | 6.457302 | 2.321172 | 0.86947 | 2.66964 | 0.007593 | 0.039858 |
| SCFD2      | 13.35113 | 1.559621 | 0.45419 | 3.43388 | 0.000595 | 0.007647 |
| SCML4      | 5.715912 | 4.34264  | 1.12307 | 3.86676 | 0.00011  | 0.002362 |
| SCN10A     | 4.121202 | 5.430053 | 1.97878 | 2.74414 | 0.006067 | 0.034696 |
| SCN1A      | 13.17872 | 5.227987 | 1.3905  | 3.75979 | 0.00017  | 0.003242 |
| SCN1A-AS1  | 3.250855 | 5.053405 | 1.74606 | 2.89417 | 0.003802 | 0.025955 |
| SCN3A      | 17.23047 | 3.499903 | 1.16201 | 3.01193 | 0.002596 | 0.0201   |
| SCN7A      | 13.29681 | 3.317339 | 1.19601 | 2.77366 | 0.005543 | 0.032849 |
| SCN8A      | 9.094355 | 2.552107 | 0.99872 | 2.55538 | 0.010607 | 0.049568 |
| SCRN1      | 14.99512 | 1.14024  | 0.38978 | 2.92536 | 0.003441 | 0.024189 |
| SDC2       | 5.382685 | 2.150162 | 0.63085 | 3.40837 | 0.000654 | 0.008127 |
| SDC3       | 90.18903 | 2.070289 | 0.3269  | 6.33317 | 2.40E-10 | 5.80E-08 |
| SDC4       | 184.216  | 1.046081 | 0.16644 | 6.28518 | 3.27E-10 | 7.15E-08 |
| SEC16B     | 3.819502 | 2.71712  | 0.95771 | 2.83711 | 0.004552 | 0.028998 |
| SEL1L2     | 4.117656 | 4.362841 | 1.58237 | 2.75716 | 0.005831 | 0.033902 |
| SELENOP    | 25.93242 | 1.14047  | 0.26799 | 4.25565 | 2.08E-05 | 0.000661 |
| SELL       | 10.59052 | 2.487238 | 0.70561 | 3.52494 | 0.000424 | 0.006103 |
| SELP       | 8.471275 | 1.668656 | 0.59676 | 2.79617 | 0.005171 | 0.03143  |
| SEMA3A     | 15.46497 | 2.237094 | 0.73858 | 3.02891 | 0.002454 | 0.019489 |
| SEMA3D     | 15.19567 | 4.589614 | 1.55022 | 2.96063 | 0.00307  | 0.022541 |
| SEMA3E     | 7.741737 | 3.377514 | 1.18273 | 2.85569 | 0.004294 | 0.027939 |
| SEMA4C     | 51.2253  | 2.10711  | 0.31475 | 6.69451 | 2.16E-11 | 7.77E-09 |
| SEMA4D     | 29.21403 | 1.191424 | 0.43022 | 2.76934 | 0.005617 | 0.033106 |
| SEMA5A     | 12.69594 | 1.822257 | 0.65963 | 2.76253 | 0.005735 | 0.033511 |
| SEMA5B     | 2.047739 | 3.748992 | 1.27134 | 2.94885 | 0.00319  | 0.023129 |
| SEPTIN14   | 3.506872 | 4.09444  | 1.35304 | 3.0261  | 0.002477 | 0.019537 |
| SEPTIN4    | 8.629982 | 1.35545  | 0.47704 | 2.84138 | 0.004492 | 0.028806 |

|           |          |          |         |         |          |          |
|-----------|----------|----------|---------|---------|----------|----------|
| SEPTIN9   | 144.7013 | 1.070572 | 0.21667 | 4.94105 | 7.77E-07 | 4.95E-05 |
| SERPINA3  | 16.56023 | 5.531144 | 1.10356 | 5.01211 | 5.38E-07 | 3.75E-05 |
| SERPINB11 | 2.926852 | 4.856647 | 1.63263 | 2.97475 | 0.002932 | 0.021832 |
| SERPINE3  | 5.749539 | 4.909782 | 1.68932 | 2.90637 | 0.003656 | 0.025246 |
| SERPING1  | 25.68043 | 1.727133 | 0.42302 | 4.08283 | 4.45E-05 | 0.001195 |
| SERPINI1  | 30.93517 | -1.19859 | 0.34793 | -3.4449 | 0.000571 | 0.00746  |
| SETDB2    | 24.62932 | 1.093886 | 0.39177 | 2.79219 | 0.005235 | 0.031664 |
| SFN       | 8.386771 | 2.546544 | 0.90039 | 2.82827 | 0.00468  | 0.02953  |
| SFR1      | 29.95722 | 1.906939 | 0.48692 | 3.91632 | 8.99E-05 | 0.002053 |
| SFRP1     | 17.62712 | 2.134515 | 0.72983 | 2.92466 | 0.003448 | 0.024196 |
| SFXN3     | 363.9894 | 1.556253 | 0.287   | 5.42251 | 5.88E-08 | 6.13E-06 |
| SGCB      | 39.48034 | -1.34595 | 0.31685 | -4.2479 | 2.16E-05 | 0.00068  |
| SGCD      | 8.123076 | 3.640784 | 1.21172 | 3.00464 | 0.002659 | 0.020412 |
| SGCZ      | 3.031779 | 4.384678 | 1.56115 | 2.80862 | 0.004975 | 0.03068  |
| SGIP1     | 6.294465 | 4.55405  | 1.31359 | 3.46687 | 0.000527 | 0.007041 |
| SGO1      | 11.06079 | 3.576871 | 1.11831 | 3.19847 | 0.001382 | 0.013343 |
| SGPP2     | 7.539918 | 2.355138 | 0.82639 | 2.8499  | 0.004373 | 0.028276 |
| SGSM2     | 17.83258 | 1.22602  | 0.38545 | 3.18074 | 0.001469 | 0.013832 |
| SH2D1B    | 6.868398 | 4.349468 | 1.31307 | 3.31245 | 0.000925 | 0.010096 |
| SH3BGRL   | 56.56306 | 1.168036 | 0.39732 | 2.93978 | 0.003284 | 0.023511 |
| SH3BP5    | 1122.892 | 2.433359 | 0.32356 | 7.52065 | 5.45E-14 | 3.04E-11 |
| SH3GL2    | 2.725645 | 4.793491 | 1.74959 | 2.73977 | 0.006148 | 0.034974 |
| SH3PXD2A  | 8658.092 | 3.074907 | 0.488   | 6.30104 | 2.96E-10 | 6.83E-08 |
| SH3PXD2B  | 30.83343 | 1.74137  | 0.33489 | 5.19978 | 2.00E-07 | 1.66E-05 |
| SH3RF2    | 3.631094 | 4.245361 | 1.36198 | 3.11704 | 0.001827 | 0.015941 |
| SHC3      | 24.39563 | 3.530301 | 0.71324 | 4.94966 | 7.43E-07 | 4.75E-05 |
| SHE       | 7.575336 | 1.784825 | 0.62406 | 2.86002 | 0.004236 | 0.027783 |
| SHF       | 7.982197 | 1.32726  | 0.46719 | 2.84091 | 0.004498 | 0.028828 |
| SHISA9    | 7.313635 | 4.040907 | 1.37131 | 2.94675 | 0.003211 | 0.023195 |
| SHISAL1   | 4.392614 | 3.900788 | 1.36558 | 2.8565  | 0.004283 | 0.027901 |
| SHOC1     | 8.30702  | 4.592995 | 1.36425 | 3.36668 | 0.000761 | 0.00892  |
| SI        | 21.05695 | 5.316048 | 1.39692 | 3.80556 | 0.000141 | 0.002834 |
| SIGLEC6   | 574.1169 | 2.734428 | 0.61418 | 4.45219 | 8.50E-06 | 0.000338 |
| SIGLECL1  | 2.767204 | 4.809883 | 1.79637 | 2.67755 | 0.007416 | 0.039221 |
| SILC1     | 4.457782 | 4.510812 | 1.67311 | 2.69606 | 0.007017 | 0.037838 |
| SIPA1L2   | 16.63626 | 1.510425 | 0.5684  | 2.65731 | 0.007877 | 0.040841 |
| SIPA1L3   | 13.77865 | 1.343712 | 0.41637 | 3.22724 | 0.00125  | 0.012459 |
| SKIDA1    | 14.88102 | 1.407655 | 0.50652 | 2.77909 | 0.005451 | 0.032572 |
| SKP2      | 60.48729 | 1.217585 | 0.30014 | 4.05669 | 4.98E-05 | 0.001294 |
| SLA       | 21.08558 | 2.099313 | 0.76571 | 2.74165 | 0.006113 | 0.034837 |
| SLC11A1   | 37.20797 | 1.279563 | 0.25553 | 5.00742 | 5.52E-07 | 3.81E-05 |
| SLC12A1   | 4.81595  | 4.149773 | 1.50672 | 2.75417 | 0.005884 | 0.034072 |
| SLC12A2   | 20.79709 | 1.632485 | 0.63767 | 2.56009 | 0.010465 | 0.049223 |
| SLC12A9   | 12.50741 | 1.07266  | 0.33703 | 3.18271 | 0.001459 | 0.013786 |

|             |          |          |         |         |          |          |
|-------------|----------|----------|---------|---------|----------|----------|
| SLC13A1     | 8.188783 | 5.917133 | 1.42011 | 4.16668 | 3.09E-05 | 0.0009   |
| SLC16A3     | 191.6307 | 1.191652 | 0.22468 | 5.30367 | 1.13E-07 | 1.05E-05 |
| SLC16A7     | 18.6338  | 3.56121  | 1.06155 | 3.35473 | 0.000794 | 0.009213 |
| SLC17A1     | 2.227362 | 4.499068 | 1.73521 | 2.59282 | 0.009519 | 0.046184 |
| SLC17A4     | 5.37707  | 4.228736 | 1.31619 | 3.21286 | 0.001314 | 0.012884 |
| SLC19A3     | 212.6589 | -1.07139 | 0.28641 | -3.7407 | 0.000183 | 0.003426 |
| SLC1A1      | 4.712715 | 4.097283 | 1.18176 | 3.46712 | 0.000526 | 0.007041 |
| SLC1A2      | 15.01203 | 1.52613  | 0.59405 | 2.56901 | 0.010199 | 0.048481 |
| SLC1A5      | 20.14872 | 1.386802 | 0.42181 | 3.28771 | 0.00101  | 0.010722 |
| SLC1A6      | 11.25577 | 5.427686 | 1.07102 | 5.06777 | 4.03E-07 | 2.97E-05 |
| SLC22A23    | 36.26067 | 1.490938 | 0.30836 | 4.83499 | 1.33E-06 | 7.80E-05 |
| SLC22A25    | 4.290606 | 4.467616 | 1.74816 | 2.55561 | 0.0106   | 0.049568 |
| SLC22A3     | 4.63401  | 4.558523 | 1.41962 | 3.21109 | 0.001322 | 0.012933 |
| SLC23A3     | 2.288217 | 3.368013 | 1.26366 | 2.66528 | 0.007692 | 0.040195 |
| SLC24A2     | 6.933541 | 3.193724 | 1.16612 | 2.73877 | 0.006167 | 0.035044 |
| SLC24A5     | 3.567791 | 5.167542 | 1.57148 | 3.28833 | 0.001008 | 0.010713 |
| SLC25A21    | 3.025481 | 3.852101 | 1.42415 | 2.70484 | 0.006834 | 0.037312 |
| SLC25A30    | 77.66702 | 1.033778 | 0.29497 | 3.50465 | 0.000457 | 0.006411 |
| SLC26A5     | 6.309813 | 3.485604 | 1.25642 | 2.77424 | 0.005533 | 0.032827 |
| SLC27A1     | 2.845682 | 3.797718 | 1.19319 | 3.18284 | 0.001458 | 0.013786 |
| SLC28A1     | 25.40651 | 1.782014 | 0.38826 | 4.58979 | 4.44E-06 | 0.000199 |
| SLC28A2     | 3.028645 | 4.946512 | 1.82128 | 2.71595 | 0.006608 | 0.036439 |
| SLC2A10     | 4.363737 | 2.620792 | 0.91239 | 2.87245 | 0.004073 | 0.027132 |
| SLC2A3      | 16.77726 | 1.664274 | 0.38427 | 4.33099 | 1.48E-05 | 0.000517 |
| SLC2A5      | 9.127908 | 1.330383 | 0.50721 | 2.62294 | 0.008717 | 0.043606 |
| SLC2A9      | 17.17457 | 1.350465 | 0.41243 | 3.27442 | 0.001059 | 0.011058 |
| SLC35F1     | 3.828541 | 4.763149 | 1.70887 | 2.7873  | 0.005315 | 0.032002 |
| SLC35G1     | 6.130501 | 4.414062 | 1.29607 | 3.40572 | 0.00066  | 0.008171 |
| SLC38A4     | 7.212746 | 5.250696 | 1.52935 | 3.43329 | 0.000596 | 0.007651 |
| SLC40A1     | 1492.223 | -1.02517 | 0.20876 | -4.9108 | 9.07E-07 | 5.64E-05 |
| SLC44A3     | 23.74337 | 1.66606  | 0.43936 | 3.79199 | 0.000149 | 0.002964 |
| SLC44A3-AS1 | 13.55434 | 1.826084 | 0.49655 | 3.67753 | 0.000236 | 0.004046 |
| SLC45A4     | 385.884  | -1.23785 | 0.23225 | -5.3297 | 9.84E-08 | 9.35E-06 |
| SLC4A10     | 10.48102 | 5.799243 | 1.37632 | 4.21358 | 2.51E-05 | 0.00076  |
| SLC4A8      | 14.79273 | 3.408391 | 1.09848 | 3.10282 | 0.001917 | 0.016449 |
| SLC52A3     | 15.72763 | 1.02149  | 0.37145 | 2.75001 | 0.005959 | 0.034316 |
| SLC5A11     | 6.075078 | 3.305428 | 1.16576 | 2.83543 | 0.004576 | 0.029081 |
| SLC6A14     | 6.267048 | 5.031403 | 1.6039  | 3.13699 | 0.001707 | 0.01528  |
| SLC6A8      | 173.0911 | 1.857432 | 0.29517 | 6.2927  | 3.12E-10 | 7.06E-08 |
| SLC6A9      | 12.42984 | 1.2615   | 0.38317 | 3.29226 | 0.000994 | 0.010599 |
| SLC7A13     | 2.898712 | 3.786078 | 1.43906 | 2.63094 | 0.008515 | 0.042858 |
| SLC7A14     | 3.819628 | 4.247132 | 1.49426 | 2.84229 | 0.004479 | 0.028735 |
| SLC9A3-AS1  | 6.604369 | 1.8665   | 0.72629 | 2.56992 | 0.010172 | 0.048425 |
| SLC9A7      | 9.436417 | 2.13604  | 0.81984 | 2.60543 | 0.009176 | 0.045214 |

|         |          |          |         |         |          |          |
|---------|----------|----------|---------|---------|----------|----------|
| SLC9A9  | 11.22527 | 2.523492 | 0.7416  | 3.40279 | 0.000667 | 0.008219 |
| SLC9B2  | 5.817759 | 3.124545 | 1.09094 | 2.86409 | 0.004182 | 0.027585 |
| SLC9C2  | 5.913071 | 2.978537 | 1.1442  | 2.60315 | 0.009237 | 0.045407 |
| SLCO1A2 | 14.72137 | 5.341013 | 1.25523 | 4.25501 | 2.09E-05 | 0.000661 |
| SLCO1B1 | 3.131536 | 5.031986 | 1.90395 | 2.64292 | 0.008219 | 0.041761 |
| SLCO1B3 | 4.519785 | 4.512107 | 1.58898 | 2.83962 | 0.004517 | 0.028874 |
| SLCO1B7 | 3.538358 | 5.187657 | 1.78759 | 2.90205 | 0.003707 | 0.025443 |
| SLCO1C1 | 4.993912 | 5.218891 | 1.74742 | 2.98662 | 0.002821 | 0.02126  |
| SLCO2A1 | 436.2977 | 1.632732 | 0.29157 | 5.59988 | 2.15E-08 | 2.63E-06 |
| SLCO6A1 | 8.065893 | 2.197559 | 0.81967 | 2.68103 | 0.00734  | 0.03893  |
| SLF1    | 23.29563 | 1.961629 | 0.62072 | 3.16025 | 0.001576 | 0.014544 |
| SLFN11  | 9.796851 | 3.283385 | 0.83106 | 3.95084 | 7.79E-05 | 0.001843 |
| SLFN13  | 6.175718 | 2.293031 | 0.84804 | 2.70393 | 0.006852 | 0.037364 |
| SLFN5   | 23.67194 | 1.689209 | 0.53175 | 3.17668 | 0.00149  | 0.013978 |
| SLIT2   | 12.54809 | 3.722744 | 0.87675 | 4.24608 | 2.18E-05 | 0.000684 |
| SLIT3   | 6.327435 | 2.379741 | 0.78989 | 3.01276 | 0.002589 | 0.020084 |
| SLITRK4 | 5.466177 | 4.225495 | 1.20373 | 3.51035 | 0.000448 | 0.006308 |
| SLITRK5 | 4.217267 | 4.422211 | 1.56214 | 2.83086 | 0.004642 | 0.029375 |
| SLITRK6 | 2.42085  | 4.063784 | 1.30023 | 3.12544 | 0.001775 | 0.0157   |
| SMARCA1 | 222.5524 | 1.126142 | 0.21782 | 5.16997 | 2.34E-07 | 1.86E-05 |
| SMC1B   | 7.95443  | 3.736976 | 1.35163 | 2.7648  | 0.005696 | 0.0334   |
| SMCO4   | 12.0155  | 1.095734 | 0.42453 | 2.58108 | 0.009849 | 0.047249 |
| SMIM21  | 4.839942 | 3.723252 | 1.45011 | 2.56757 | 0.010241 | 0.048569 |
| SMIM22  | 24.10771 | 1.07217  | 0.31533 | 3.40019 | 0.000673 | 0.008248 |
| SMKR1   | 34.87524 | -1.75688 | 0.30587 | -5.7438 | 9.26E-09 | 1.27E-06 |
| SNAP91  | 7.468742 | 3.532022 | 0.97482 | 3.62326 | 0.000291 | 0.004674 |
| SNCAIP  | 6.556985 | 3.029538 | 1.14573 | 2.64419 | 0.008189 | 0.041715 |
| SNPH    | 3.054082 | 3.074125 | 1.17345 | 2.61974 | 0.0088   | 0.043949 |
| SNTG1   | 8.744213 | 5.525398 | 1.44438 | 3.82543 | 0.000131 | 0.002661 |
| SNTG2   | 2.279408 | 4.489336 | 1.47142 | 3.05102 | 0.002281 | 0.018536 |
| SNX21   | 15.60031 | 1.122526 | 0.39592 | 2.8352  | 0.00458  | 0.029081 |
| SNX30   | 12.02773 | 1.487349 | 0.50429 | 2.94939 | 0.003184 | 0.023114 |
| SNX33   | 19.24201 | 2.01291  | 0.38708 | 5.20022 | 1.99E-07 | 1.66E-05 |
| SOD1    | 1857.776 | -1.54524 | 0.24023 | -6.4324 | 1.26E-10 | 3.56E-08 |
| SOD2    | 248.8448 | 1.005151 | 0.28486 | 3.52863 | 0.000418 | 0.006063 |
| SORBS3  | 98.06734 | 1.148995 | 0.25357 | 4.53128 | 5.86E-06 | 0.000252 |
| SORCS1  | 7.87082  | 4.45578  | 1.3963  | 3.19112 | 0.001417 | 0.013557 |
| SORCS3  | 5.772023 | 4.432412 | 1.70048 | 2.60656 | 0.009146 | 0.04515  |
| SORL1   | 23.05006 | 1.091852 | 0.39445 | 2.768   | 0.00564  | 0.033213 |
| SOX11   | 4.637399 | 4.057039 | 1.52455 | 2.66113 | 0.007788 | 0.040484 |
| SOX2-OT | 5.023974 | 4.723225 | 1.4806  | 3.19008 | 0.001422 | 0.013575 |
| SOX4    | 21.41448 | 1.523392 | 0.37812 | 4.0289  | 5.60E-05 | 0.001429 |
| SOX5    | 17.87315 | 4.088369 | 0.95861 | 4.26488 | 2.00E-05 | 0.000642 |
| SP140   | 10.44424 | 3.044626 | 1.01596 | 2.99678 | 0.002728 | 0.020758 |

|             |          |          |         |         |          |          |
|-------------|----------|----------|---------|---------|----------|----------|
| SP6         | 28.33393 | 2.79987  | 0.43597 | 6.42215 | 1.34E-10 | 3.75E-08 |
| SPAG17      | 8.402569 | 4.664684 | 1.38824 | 3.36014 | 0.000779 | 0.009093 |
| SPAG4       | 13.35002 | 2.360848 | 0.56474 | 4.1804  | 2.91E-05 | 0.000855 |
| SPATA22     | 3.622087 | 3.615163 | 1.22304 | 2.95589 | 0.003118 | 0.022756 |
| SPATA6      | 9.462889 | 1.83584  | 0.68277 | 2.6888  | 0.007171 | 0.038322 |
| SPHKAP      | 5.985412 | 4.942279 | 1.4661  | 3.37104 | 0.000749 | 0.008835 |
| SPIN4       | 22.23598 | 1.307778 | 0.33418 | 3.91344 | 9.10E-05 | 0.002072 |
| SPINK1      | 14.304   | 2.833367 | 0.98578 | 2.87425 | 0.00405  | 0.027033 |
| SPN         | 6.448459 | 3.741082 | 1.04417 | 3.58283 | 0.00034  | 0.005228 |
| SPON2       | 5.023195 | 2.569558 | 0.91301 | 2.81437 | 0.004887 | 0.030308 |
| SPP1        | 45.69488 | 1.631194 | 0.41257 | 3.9537  | 7.70E-05 | 0.001843 |
| SPRED1      | 12.53205 | 1.861171 | 0.5726  | 3.2504  | 0.001152 | 0.01174  |
| SPTBN4      | 2.884342 | 4.344018 | 1.61664 | 2.68706 | 0.007208 | 0.038386 |
| SQOR        | 10.61364 | 1.974894 | 0.70506 | 2.80104 | 0.005094 | 0.031111 |
| SRD5A2      | 3.559187 | 4.657512 | 1.5521  | 3.00078 | 0.002693 | 0.020565 |
| SRD5A3      | 3.725261 | 2.602713 | 0.94535 | 2.75317 | 0.005902 | 0.034087 |
| SSPOP       | 3.94441  | 3.014602 | 1.17991 | 2.55494 | 0.010621 | 0.049574 |
| ST3GAL5     | 5.091351 | 2.487257 | 0.7295  | 3.40954 | 0.000651 | 0.008127 |
| ST3GAL6-AS1 | 15.34153 | -1.18821 | 0.45083 | -2.6356 | 0.008399 | 0.042404 |
| ST6GAL1     | 12.07026 | 2.179062 | 0.63548 | 3.42898 | 0.000606 | 0.007719 |
| ST6GAL2     | 8.627182 | 3.951907 | 1.02017 | 3.87379 | 0.000107 | 0.002301 |
| ST6GALNAC5  | 3.882835 | 4.300991 | 1.54646 | 2.78118 | 0.005416 | 0.032449 |
| ST8SIA3     | 2.656199 | 4.744659 | 1.71462 | 2.76719 | 0.005654 | 0.033271 |
| ST8SIA4     | 53.09607 | 1.319365 | 0.40109 | 3.28948 | 0.001004 | 0.010683 |
| ST8SIA6     | 9.316211 | 3.577206 | 0.82682 | 4.32645 | 1.52E-05 | 0.000526 |
| STARD4-AS1  | 3.180049 | 3.986065 | 1.49344 | 2.66906 | 0.007606 | 0.039914 |
| STC1        | 7.747157 | 3.138084 | 0.80774 | 3.88503 | 0.000102 | 0.002222 |
| STC2        | 5.811875 | 4.435011 | 1.05984 | 4.18462 | 2.86E-05 | 0.000843 |
| STEAP2      | 6.108649 | 4.531912 | 1.69493 | 2.6738  | 0.0075   | 0.039546 |
| STK39       | 17.3362  | 1.786214 | 0.53474 | 3.34036 | 0.000837 | 0.00946  |
| STOX2       | 8.800036 | 3.18418  | 1.2034  | 2.64598 | 0.008146 | 0.041582 |
| STXBP5-AS1  | 6.943833 | 3.152854 | 0.94096 | 3.35066 | 0.000806 | 0.009263 |
| STXBP5L     | 20.08508 | 4.910079 | 1.77146 | 2.77177 | 0.005575 | 0.03298  |
| STXBP6      | 7.019469 | 2.028299 | 0.66495 | 3.0503  | 0.002286 | 0.018554 |
| SUGCT       | 7.131414 | 2.591383 | 0.88401 | 2.93141 | 0.003374 | 0.02392  |
| SUN2        | 80.58336 | 1.048491 | 0.2446  | 4.28661 | 1.81E-05 | 0.000599 |
| SYBU        | 6.193945 | 1.868398 | 0.62392 | 2.9946  | 0.002748 | 0.020868 |
| SYCP1       | 12.93795 | 4.355385 | 1.30025 | 3.34966 | 0.000809 | 0.009271 |
| SYCP2       | 16.84006 | 3.561132 | 1.03804 | 3.43062 | 0.000602 | 0.007698 |
| SYCP3       | 2.777975 | 4.775594 | 1.57784 | 3.02667 | 0.002473 | 0.019522 |
| SYDE1       | 913.2293 | 1.250131 | 0.24047 | 5.19878 | 2.01E-07 | 1.66E-05 |
| SYNE1       | 62.04018 | 2.187133 | 0.59977 | 3.6466  | 0.000266 | 0.004389 |
| SYNPO2      | 23.84574 | 1.958985 | 0.54116 | 3.61996 | 0.000295 | 0.004702 |

|          |          |          |         |         |          |          |
|----------|----------|----------|---------|---------|----------|----------|
| SYNPO2L  | 74.68843 | -1.05845 | 0.3535  | -2.9942 | 0.002752 | 0.020875 |
| SYT10    | 4.970839 | 4.67982  | 1.55341 | 3.0126  | 0.00259  | 0.020084 |
| SYT14    | 10.19893 | 4.538523 | 1.24178 | 3.65484 | 0.000257 | 0.004302 |
| SYT9     | 7.956042 | 5.391389 | 1.56858 | 3.43712 | 0.000588 | 0.00761  |
| SYTL1    | 5.399775 | 2.573688 | 0.81767 | 3.1476  | 0.001646 | 0.014951 |
| TAGAP    | 12.66318 | 1.765369 | 0.6625  | 2.6647  | 0.007706 | 0.040232 |
| TAGLN    | 30.37345 | 1.883471 | 0.38713 | 4.86523 | 1.14E-06 | 6.82E-05 |
| TARID    | 1.93893  | 4.275722 | 1.58551 | 2.69674 | 0.007002 | 0.037785 |
| TBC1D16  | 8.169234 | 1.780467 | 0.61821 | 2.88006 | 0.003976 | 0.026672 |
| TBC1D31  | 19.80284 | 1.47459  | 0.55918 | 2.63705 | 0.008363 | 0.042252 |
| TBX18    | 6.389284 | 4.034972 | 1.44527 | 2.79184 | 0.005241 | 0.031687 |
| TCEAL3   | 10.14927 | 2.687964 | 0.7222  | 3.72189 | 0.000198 | 0.003588 |
| TCEAL7   | 4.245461 | 3.367589 | 1.08048 | 3.11676 | 0.001829 | 0.015945 |
| TCERG1L  | 3.333432 | 3.066915 | 0.99328 | 3.08767 | 0.002017 | 0.017004 |
| TCF4     | 42.4452  | 1.577267 | 0.4044  | 3.90028 | 9.61E-05 | 0.002151 |
| TCF7L2   | 26.29876 | 1.323023 | 0.34262 | 3.86153 | 0.000113 | 0.002394 |
| TCHH     | 613.8833 | -1.08836 | 0.31061 | -3.504  | 0.000458 | 0.006421 |
| TCHHL1   | 9.964026 | -1.14154 | 0.42416 | -2.6913 | 0.007117 | 0.038158 |
| TDRD1    | 4.796456 | 5.133585 | 1.37145 | 3.74317 | 0.000182 | 0.003408 |
| TDRD15   | 6.553528 | 4.174274 | 1.47654 | 2.82707 | 0.004698 | 0.029558 |
| TDRD5    | 5.996559 | 2.459425 | 0.89475 | 2.74874 | 0.005983 | 0.034396 |
| TDRD9    | 8.334287 | 3.744372 | 1.33869 | 2.79704 | 0.005157 | 0.03138  |
| TECRL    | 5.652783 | 4.867022 | 1.4933  | 3.25924 | 0.001117 | 0.011503 |
| TENM1    | 13.16897 | 4.724849 | 1.30817 | 3.61179 | 0.000304 | 0.004815 |
| TENM2    | 3.437596 | 3.193131 | 1.18829 | 2.68716 | 0.007206 | 0.038386 |
| TENM4    | 7.998172 | 2.483579 | 0.67095 | 3.70157 | 0.000214 | 0.003803 |
| TESPA1   | 10.57298 | 3.803052 | 1.21798 | 3.12243 | 0.001794 | 0.01582  |
| TET1     | 14.00835 | 1.725292 | 0.34402 | 5.01509 | 5.30E-07 | 3.71E-05 |
| TET3     | 339.5412 | 2.016385 | 0.31234 | 6.45569 | 1.08E-10 | 3.17E-08 |
| TEX15    | 11.52078 | 5.111904 | 1.88818 | 2.70732 | 0.006783 | 0.037122 |
| TG       | 7.139335 | 4.260266 | 1.22985 | 3.46405 | 0.000532 | 0.007086 |
| TGFB2    | 8.467265 | 1.749427 | 0.58273 | 3.00214 | 0.002681 | 0.020541 |
| TGIF2    | 10.68407 | 1.882292 | 0.66734 | 2.82058 | 0.004794 | 0.029934 |
| TGM1     | 9.802744 | 2.636422 | 0.57774 | 4.56331 | 5.04E-06 | 0.000221 |
| THBS4    | 3.59493  | 5.204089 | 1.79654 | 2.89674 | 0.003771 | 0.025776 |
| THRB-AS2 | 183.069  | 1.84841  | 0.34949 | 5.28895 | 1.23E-07 | 1.13E-05 |
| THSD7A   | 1190.169 | -1.13189 | 0.22118 | -5.1175 | 3.10E-07 | 2.38E-05 |
| THSD7B   | 7.577819 | 5.303568 | 1.36077 | 3.89747 | 9.72E-05 | 0.002156 |
| TIGIT    | 6.125418 | 4.469066 | 1.39058 | 3.21381 | 0.00131  | 0.012855 |
| TIMP3    | 1470.625 | 1.556722 | 0.2876  | 5.41274 | 6.21E-08 | 6.43E-06 |
| TIPIN    | 6.002866 | 3.581968 | 1.00335 | 3.57003 | 0.000357 | 0.005409 |
| TK1      | 5.45603  | 2.120354 | 0.79914 | 2.65329 | 0.007971 | 0.041159 |
| TLCD5    | 85.02701 | -1.70755 | 0.26811 | -6.3689 | 1.90E-10 | 4.76E-08 |
| TLE6     | 8.412028 | 1.593976 | 0.46395 | 3.43567 | 0.000591 | 0.007633 |



|            |          |          |         |         |          |          |
|------------|----------|----------|---------|---------|----------|----------|
| TLR1       | 3.795195 | 2.332821 | 0.87021 | 2.68076 | 0.007345 | 0.038936 |
| TLR7       | 3.925896 | 3.821311 | 1.29993 | 2.93963 | 0.003286 | 0.023511 |
| TM4SF1     | 55.41369 | 1.783484 | 0.47334 | 3.76787 | 0.000165 | 0.003173 |
| TM7SF3     | 15.5511  | 1.210599 | 0.4085  | 2.96351 | 0.003042 | 0.022394 |
| TMC2       | 1.715891 | 4.1008   | 1.47744 | 2.77562 | 0.00551  | 0.032749 |
| TMC6       | 28.06221 | 1.187929 | 0.42066 | 2.82393 | 0.004744 | 0.029715 |
| TMED8      | 45.04206 | 1.130285 | 0.27498 | 4.11048 | 3.95E-05 | 0.001078 |
| TMEM132B   | 12.20751 | 4.826708 | 1.02563 | 4.7061  | 2.52E-06 | 0.000126 |
| TMEM168    | 100.5092 | -1.22287 | 0.22378 | -5.4645 | 4.64E-08 | 5.00E-06 |
| TMEM178B   | 5.103914 | 3.837133 | 1.35443 | 2.83303 | 0.004611 | 0.029199 |
| TMEM184A   | 19.76299 | 1.488431 | 0.39201 | 3.79692 | 0.000147 | 0.00291  |
| TMEM196    | 5.448306 | 5.284378 | 1.46162 | 3.61543 | 0.0003   | 0.004766 |
| TMEM200A   | 6.412969 | 3.483334 | 1.18246 | 2.94584 | 0.003221 | 0.023246 |
| TMEM201    | 6.013324 | 1.471216 | 0.54114 | 2.71872 | 0.006554 | 0.036268 |
| TMEM207    | 3.137582 | 3.981571 | 1.53297 | 2.5973  | 0.009396 | 0.045865 |
| TMEM215    | 5.058591 | 4.675252 | 1.54458 | 3.02688 | 0.002471 | 0.019522 |
| TMEM252    | 2.769152 | 4.361198 | 1.54995 | 2.81376 | 0.004897 | 0.030354 |
| TMEM256    | 3.957686 | 2.350642 | 0.71888 | 3.26986 | 0.001076 | 0.011205 |
| TMEM26     | 6.627293 | 3.43456  | 1.21594 | 2.82462 | 0.004734 | 0.029677 |
| TMEM30A-DT | 4.784045 | 3.487087 | 1.22775 | 2.84022 | 0.004508 | 0.028865 |
| TMEM45A    | 74.89571 | 4.039097 | 0.53335 | 7.57303 | 3.65E-14 | 2.18E-11 |
| TMEM67     | 9.068217 | 3.097855 | 0.85468 | 3.62457 | 0.000289 | 0.004671 |
| TMEM74     | 6.029129 | -1.944   | 0.72356 | -2.6867 | 0.007216 | 0.038414 |
| TMEM91     | 24.39353 | 2.485867 | 0.45839 | 5.42303 | 5.86E-08 | 6.13E-06 |
| TMOD2      | 9.058722 | 2.071992 | 0.68636 | 3.01882 | 0.002538 | 0.019864 |
| TMPRSS15   | 9.484571 | 3.84128  | 1.30279 | 2.9485  | 0.003193 | 0.023129 |
| TMPRSS5    | 2.070638 | 4.381004 | 1.54396 | 2.83751 | 0.004547 | 0.028985 |
| TMTC4      | 9.479017 | 1.523561 | 0.50033 | 3.04511 | 0.002326 | 0.018774 |
| TMX4       | 203.4821 | -1.00577 | 0.19638 | -5.1215 | 3.03E-07 | 2.36E-05 |
| TNC        | 7.314176 | 2.24876  | 0.84633 | 2.65707 | 0.007882 | 0.040846 |
| TNFAIP2    | 148.9784 | 2.080332 | 0.33914 | 6.13409 | 8.56E-10 | 1.61E-07 |
| TNFAIP6    | 4.113615 | 3.789141 | 1.46582 | 2.58499 | 0.009738 | 0.046884 |
| TNFSF10    | 21.67359 | 2.205016 | 0.51657 | 4.26853 | 1.97E-05 | 0.000635 |
| TNIK       | 16.36901 | 1.956376 | 0.65008 | 3.00946 | 0.002617 | 0.020187 |
| TNIP3      | 3.662125 | 4.230184 | 1.58272 | 2.67272 | 0.007524 | 0.039621 |
| TNNT1      | 29.48085 | 2.109257 | 0.40054 | 5.26599 | 1.39E-07 | 1.25E-05 |
| TNNT2      | 2.401683 | 3.485436 | 1.19565 | 2.9151  | 0.003556 | 0.024757 |
| TNNT3      | 6.256875 | 2.803499 | 0.68908 | 4.06847 | 4.73E-05 | 0.001246 |
| TNR        | 8.133307 | 2.989232 | 0.70787 | 4.22286 | 2.41E-05 | 0.000746 |
| TNS2       | 11.08142 | 1.101008 | 0.43036 | 2.55835 | 0.010517 | 0.049364 |
| TONSL      | 4.036547 | 2.164718 | 0.75639 | 2.8619  | 0.004211 | 0.027709 |
| TOP2A      | 19.34565 | 1.691051 | 0.49075 | 3.44584 | 0.000569 | 0.007452 |
| TOX3       | 2.69154  | 4.772737 | 1.74371 | 2.73711 | 0.006198 | 0.03516  |
| TPBG       | 57.28434 | 2.227214 | 0.29399 | 7.57584 | 3.57E-14 | 2.18E-11 |

|           |          |          |         |         |          |          |
|-----------|----------|----------|---------|---------|----------|----------|
| TPH2      | 2.806018 | 4.241762 | 1.40268 | 3.02404 | 0.002494 | 0.019642 |
| TPM2      | 12.21586 | 2.03861  | 0.50062 | 4.07219 | 4.66E-05 | 0.001228 |
| TPPP      | 12.74851 | 5.272853 | 1.14145 | 4.61944 | 3.85E-06 | 0.000177 |
| TPRN      | 8.273409 | 1.309741 | 0.4977  | 2.63158 | 0.008499 | 0.042806 |
| TRAF1     | 4.268492 | 2.778838 | 1.08663 | 2.55729 | 0.010549 | 0.04942  |
| TRDC      | 7.493582 | 2.494016 | 0.78697 | 3.16916 | 0.001529 | 0.014213 |
| TRDN-AS1  | 3.660824 | 4.21204  | 1.64576 | 2.55932 | 0.010488 | 0.049272 |
| TREM1     | 100.7233 | 3.094265 | 0.50222 | 6.16117 | 7.22E-10 | 1.37E-07 |
| TREML2    | 758.5769 | 1.097833 | 0.24283 | 4.52091 | 6.16E-06 | 0.000263 |
| TRERF1    | 6.977604 | 3.238722 | 1.03892 | 3.11739 | 0.001825 | 0.015937 |
| TRERNA1   | 2.35126  | 3.413825 | 1.24297 | 2.74651 | 0.006023 | 0.034514 |
| TRHDE     | 8.663564 | 4.32108  | 1.27147 | 3.3985  | 0.000678 | 0.00828  |
| TRHDE-AS1 | 6.371962 | 4.478488 | 1.45516 | 3.07766 | 0.002086 | 0.017395 |
| TRIM14    | 38.67764 | 2.507889 | 0.56753 | 4.41896 | 9.92E-06 | 0.000381 |
| TRIM16    | 8.195706 | 1.446382 | 0.50591 | 2.85897 | 0.00425  | 0.027841 |
| TRIM36    | 6.176547 | 3.146892 | 1.14684 | 2.74397 | 0.00607  | 0.034702 |
| TRIM51    | 4.464185 | 5.023916 | 1.85297 | 2.71128 | 0.006702 | 0.036831 |
| TRIM65    | 4.875716 | 2.249905 | 0.7669  | 2.93376 | 0.003349 | 0.023842 |
| TRIM72    | 2.075969 | 3.232419 | 1.24873 | 2.58857 | 0.009638 | 0.046567 |
| TRIP6     | 13.66815 | 1.739396 | 0.41538 | 4.18747 | 2.82E-05 | 0.000834 |
| TRMT9B    | 97.79052 | -1.19378 | 0.31324 | -3.811  | 0.000138 | 0.002786 |
| TRNC      | 24.65186 | 1.435614 | 0.52685 | 2.72491 | 0.006432 | 0.035906 |
| TRND      | 11.02273 | 2.99393  | 0.93947 | 3.18681 | 0.001438 | 0.01368  |
| TRNE      | 295.3183 | 2.682314 | 0.77327 | 3.4688  | 0.000523 | 0.007015 |
| TRNF      | 47.98489 | 1.795118 | 0.52631 | 3.41078 | 0.000648 | 0.008116 |
| TRNG      | 32.29572 | 2.349226 | 0.62472 | 3.76042 | 0.00017  | 0.003241 |
| TRNH      | 13.78865 | 2.522653 | 0.67866 | 3.71712 | 0.000202 | 0.003637 |
| TRNI      | 65.61125 | 1.947311 | 0.3916  | 4.97265 | 6.60E-07 | 4.31E-05 |
| TRNK      | 16.3867  | 3.339875 | 0.84367 | 3.95875 | 7.53E-05 | 0.00181  |
| TRNL1     | 98.5206  | 2.19287  | 0.50626 | 4.33155 | 1.48E-05 | 0.000517 |
| TRNL2     | 33.99496 | 1.92085  | 0.57847 | 3.32058 | 0.000898 | 0.009912 |
| TRNM      | 63.11569 | 2.251802 | 0.50942 | 4.4203  | 9.86E-06 | 0.000381 |
| TRNP      | 345.308  | 2.643609 | 0.55865 | 4.73212 | 2.22E-06 | 0.000115 |
| TRNQ      | 307.7755 | 2.731826 | 0.83222 | 3.28259 | 0.001029 | 0.010847 |
| TRNS1     | 158.9828 | 2.86964  | 0.75128 | 3.81964 | 0.000134 | 0.002708 |
| TRNS2     | 2.847012 | 3.244431 | 1.18745 | 2.73226 | 0.00629  | 0.035532 |
| TRNT      | 77.77654 | 2.384397 | 0.38966 | 6.11921 | 9.40E-10 | 1.75E-07 |
| TRNV      | 41.97457 | 1.719129 | 0.4775  | 3.60026 | 0.000318 | 0.00498  |
| TRNW      | 425.8926 | 2.33262  | 0.36559 | 6.38047 | 1.77E-10 | 4.60E-08 |
| TRNY      | 18.85171 | 1.69198  | 0.53913 | 3.13836 | 0.001699 | 0.015259 |
| TRPA1     | 6.022499 | 4.973055 | 1.59836 | 3.11135 | 0.001862 | 0.016135 |
| TRPC1     | 7.744261 | 3.840849 | 1.14861 | 3.34391 | 0.000826 | 0.009418 |
| TRPM3     | 7.005402 | 4.749011 | 1.3826  | 3.43484 | 0.000593 | 0.007647 |
| TRPM8     | 5.527025 | 5.341807 | 1.69037 | 3.16013 | 0.001577 | 0.014544 |

|          |          |          |         |         |          |          |
|----------|----------|----------|---------|---------|----------|----------|
| TSC22D3  | 39.45356 | 1.327847 | 0.37908 | 3.50282 | 0.00046  | 0.006438 |
| TSG1     | 6.10728  | 4.977215 | 1.3338  | 3.73161 | 0.00019  | 0.003496 |
| TSHZ2    | 11.67146 | 3.173717 | 0.89361 | 3.55157 | 0.000383 | 0.005722 |
| TSHZ3    | 3.967714 | 3.195106 | 1.18293 | 2.701   | 0.006913 | 0.037572 |
| TSIX     | 20.8567  | 5.440009 | 1.35183 | 4.02419 | 5.72E-05 | 0.001449 |
| TTC26    | 7.621625 | 3.506507 | 1.20357 | 2.91342 | 0.003575 | 0.024859 |
| TTC6     | 5.66383  | 4.859127 | 1.29884 | 3.74114 | 0.000183 | 0.003426 |
| TTK      | 11.49078 | 3.244511 | 0.81637 | 3.97429 | 7.06E-05 | 0.001724 |
| TTN      | 81.04829 | 4.019663 | 0.97341 | 4.12947 | 3.64E-05 | 0.001022 |
| TTYH3    | 12.84219 | 1.326051 | 0.44794 | 2.96036 | 0.003073 | 0.02255  |
| TUBA4A   | 120.2566 | 1.129368 | 0.27616 | 4.08948 | 4.32E-05 | 0.001171 |
| TUBB6    | 22.7073  | 1.193764 | 0.39929 | 2.98975 | 0.002792 | 0.021074 |
| TVP23A   | 10.06327 | 3.281695 | 0.82971 | 3.95521 | 7.65E-05 | 0.001834 |
| TXLNB    | 7.616359 | 3.498611 | 1.31337 | 2.66384 | 0.007725 | 0.040286 |
| TXNIP    | 106.214  | 1.220297 | 0.38127 | 3.20063 | 0.001371 | 0.013283 |
| TXNRD1   | 1497.486 | -1.2758  | 0.23336 | -5.467  | 4.58E-08 | 4.97E-06 |
| TYRP1    | 3.339523 | 5.092152 | 1.79278 | 2.84036 | 0.004506 | 0.028864 |
| U2AF1    | 9.741203 | -5.69277 | 1.92202 | -2.9619 | 0.003058 | 0.022481 |
| UACA     | 24.04263 | 1.698101 | 0.58774 | 2.88922 | 0.003862 | 0.026185 |
| UBASH3A  | 2.984755 | 3.366584 | 1.23471 | 2.72661 | 0.006399 | 0.035833 |
| UBASH3B  | 65.9326  | 1.85799  | 0.29954 | 6.20276 | 5.55E-10 | 1.07E-07 |
| UBE2L6   | 34.78424 | 1.976274 | 0.56265 | 3.51242 | 0.000444 | 0.006271 |
| UCA1     | 1093.435 | 1.848242 | 0.35601 | 5.19156 | 2.09E-07 | 1.71E-05 |
| UGT2B11  | 5.393774 | 4.308688 | 1.57674 | 2.73265 | 0.006283 | 0.035515 |
| UGT3A1   | 3.535915 | 5.17062  | 1.58514 | 3.26194 | 0.001107 | 0.011446 |
| ULK3     | 18.38124 | 1.188134 | 0.377   | 3.15158 | 0.001624 | 0.01481  |
| UMOD     | 3.626049 | 5.198875 | 1.5741  | 3.30275 | 0.000957 | 0.010319 |
| UMODL1   | 1.914623 | 3.679622 | 1.4187  | 2.59366 | 0.009496 | 0.046117 |
| UNC13A   | 6.303555 | 4.497329 | 1.34332 | 3.34791 | 0.000814 | 0.009323 |
| UNC13B   | 30.78648 | 1.045761 | 0.28143 | 3.71593 | 0.000202 | 0.003646 |
| UNC13C   | 11.34945 | 5.088645 | 1.37003 | 3.71425 | 0.000204 | 0.003665 |
| UNC5C    | 9.004367 | 4.672301 | 1.30507 | 3.58012 | 0.000343 | 0.005263 |
| UNC5D    | 10.41243 | 4.048413 | 1.44233 | 2.80685 | 0.005003 | 0.030788 |
| UNC80    | 17.85057 | 4.42387  | 1.64934 | 2.6822  | 0.007314 | 0.038832 |
| UPK2     | 5.300159 | 4.755119 | 1.04449 | 4.55258 | 5.30E-06 | 0.000229 |
| URB1     | 24.34042 | 1.146465 | 0.39992 | 2.86671 | 0.004148 | 0.027414 |
| USH2A    | 22.17299 | 2.245549 | 0.78575 | 2.85784 | 0.004265 | 0.027862 |
| USP18    | 8.840701 | 3.79703  | 0.89988 | 4.21948 | 2.45E-05 | 0.000748 |
| USP28    | 12.68491 | 1.977332 | 0.64388 | 3.07095 | 0.002134 | 0.017686 |
| USP32P1  | 2.796225 | 2.890882 | 0.99746 | 2.89824 | 0.003753 | 0.025664 |
| USP44    | 4.394946 | 5.519822 | 1.73459 | 3.18221 | 0.001462 | 0.013794 |
| USP46-DT | 45.20206 | -1.2075  | 0.21798 | -5.5396 | 3.03E-08 | 3.45E-06 |
| USP6     | 4.211189 | 3.963366 | 1.38724 | 2.85702 | 0.004276 | 0.027879 |
| VANGL1   | 6.427238 | 2.623192 | 0.75495 | 3.47468 | 0.000511 | 0.006931 |

|           |          |          |         |         |          |          |
|-----------|----------|----------|---------|---------|----------|----------|
| VANGL2    | 6.099385 | 3.128574 | 1.22167 | 2.5609  | 0.01044  | 0.049166 |
| VASH1     | 14.48258 | 1.231526 | 0.44828 | 2.74725 | 0.00601  | 0.034488 |
| VCAM1     | 4.379422 | 3.143854 | 1.19211 | 2.63721 | 0.008359 | 0.042245 |
| VCAN-AS1  | 5.388291 | 5.274221 | 1.35395 | 3.89543 | 9.80E-05 | 0.002156 |
| VDR       | 66.2172  | 1.402827 | 0.30417 | 4.61203 | 3.99E-06 | 0.000182 |
| VEGFA     | 6.446396 | 1.768349 | 0.55815 | 3.16823 | 0.001534 | 0.014234 |
| VEGFC     | 2.673746 | 3.174414 | 1.11304 | 2.85203 | 0.004344 | 0.028149 |
| VIM       | 202.3211 | 1.126397 | 0.36258 | 3.10662 | 0.001892 | 0.016309 |
| VIP       | 4.236693 | 4.433759 | 1.71815 | 2.58054 | 0.009864 | 0.047267 |
| VIT       | 3.831751 | 4.279112 | 1.29485 | 3.30471 | 0.000951 | 0.010278 |
| VNN3P     | 35.49314 | -1.92381 | 0.42488 | -4.5279 | 5.96E-06 | 0.000255 |
| VOPP1     | 10.01628 | 2.202255 | 0.69117 | 3.18628 | 0.001441 | 0.013688 |
| VSTM2A    | 5.093478 | 3.647532 | 1.29258 | 2.82191 | 0.004774 | 0.029857 |
| VWA1      | 123.9823 | 1.184355 | 0.22033 | 5.37536 | 7.64E-08 | 7.67E-06 |
| VWA2      | 2.146701 | 4.487097 | 1.66208 | 2.69969 | 0.00694  | 0.037628 |
| VWA3A     | 5.908137 | 4.418923 | 1.55548 | 2.84088 | 0.004499 | 0.028828 |
| VWA5B1    | 4.516984 | 5.557355 | 1.37807 | 4.0327  | 5.51E-05 | 0.001411 |
| VWC2L     | 4.238701 | 5.460334 | 1.54783 | 3.52773 | 0.000419 | 0.006063 |
| VWCE      | 18.7533  | 2.238891 | 0.43926 | 5.09699 | 3.45E-07 | 2.59E-05 |
| VWDE      | 21.08863 | 2.767376 | 0.64007 | 4.32354 | 1.54E-05 | 0.000526 |
| WASF3     | 7.528473 | 2.282953 | 0.77863 | 2.93201 | 0.003368 | 0.023911 |
| WDFY4     | 16.67285 | 2.439863 | 0.72372 | 3.37126 | 0.000748 | 0.008835 |
| WDR17     | 14.31635 | 5.718914 | 1.6681  | 3.42839 | 0.000607 | 0.007729 |
| WDR31     | 6.206411 | 2.74835  | 1.01972 | 2.6952  | 0.007035 | 0.037887 |
| WDR72     | 11.6732  | 2.409884 | 0.79801 | 3.01987 | 0.002529 | 0.019847 |
| WDR76     | 10.80985 | 1.544085 | 0.43929 | 3.51498 | 0.00044  | 0.006248 |
| WDR86     | 21.0606  | 2.459476 | 0.49373 | 4.98142 | 6.31E-07 | 4.18E-05 |
| WDR86-AS1 | 95.73816 | 2.163935 | 0.45095 | 4.79856 | 1.60E-06 | 8.82E-05 |
| WDR87     | 2.718732 | 4.312071 | 1.62111 | 2.65995 | 0.007815 | 0.040613 |
| WHRN      | 5.126192 | 2.988356 | 0.89424 | 3.34179 | 0.000832 | 0.00945  |
| WIF1      | 3.870227 | 5.308101 | 1.81612 | 2.92277 | 0.003469 | 0.024302 |
| WIPF1     | 87.56659 | 1.01113  | 0.30941 | 3.26794 | 0.001083 | 0.011246 |
| XAF1      | 13.02695 | 1.830075 | 0.57747 | 3.16915 | 0.001529 | 0.014213 |
| XIRP2     | 11.45875 | 4.483655 | 1.37145 | 3.26927 | 0.001078 | 0.011205 |
| XKR3      | 1.554306 | 3.997244 | 1.46617 | 2.72632 | 0.006405 | 0.03584  |
| YEATS2    | 30.91092 | 1.119954 | 0.34207 | 3.27403 | 0.00106  | 0.011066 |
| ZAN       | 4.267741 | 4.456282 | 1.62314 | 2.74547 | 0.006042 | 0.03458  |
| ZBBX      | 6.95216  | 3.401391 | 1.17846 | 2.88631 | 0.003898 | 0.026301 |
| ZBED2     | 4.687047 | 3.557285 | 1.28969 | 2.75825 | 0.005811 | 0.03384  |
| ZBTB16    | 3.238493 | 4.512546 | 1.31708 | 3.42618 | 0.000612 | 0.007768 |
| ZBTB4     | 192.3745 | 1.11979  | 0.1609  | 6.95963 | 3.41E-12 | 1.38E-09 |
| ZBTB7C    | 12.49365 | 1.37831  | 0.49206 | 2.80111 | 0.005093 | 0.031111 |
| ZC2HC1A   | 77.57462 | -1.53043 | 0.37533 | -4.0776 | 4.55E-05 | 0.001214 |
| ZC3H12B   | 4.860497 | 3.76009  | 1.25266 | 3.00169 | 0.002685 | 0.020542 |

|          |          |          |         |         |          |          |
|----------|----------|----------|---------|---------|----------|----------|
| ZDHHC14  | 12.70505 | 1.193217 | 0.40231 | 2.96594 | 0.003018 | 0.022297 |
| ZEB1     | 46.1577  | 1.511824 | 0.38297 | 3.94762 | 7.89E-05 | 0.00186  |
| ZEB2     | 33.40612 | 1.604759 | 0.48237 | 3.32682 | 0.000878 | 0.009747 |
| ZFHX2    | 3.570478 | 4.151823 | 1.47041 | 2.82357 | 0.004749 | 0.029737 |
| ZFHX4    | 12.99436 | 6.142127 | 1.77633 | 3.45777 | 0.000545 | 0.007216 |
| ZFP42    | 2.554314 | 3.220707 | 1.14673 | 2.8086  | 0.004976 | 0.03068  |
| ZFPM2    | 5.918371 | 2.83763  | 0.94818 | 2.99271 | 0.002765 | 0.020914 |
| ZFTA     | 17.30527 | 1.050671 | 0.3973  | 2.64452 | 0.008181 | 0.041715 |
| ZMAT1    | 8.86364  | 5.545842 | 1.30037 | 4.26481 | 2.00E-05 | 0.000642 |
| ZNF114   | 62.03662 | 1.564353 | 0.42903 | 3.64622 | 0.000266 | 0.004389 |
| ZNF204P  | 6.718038 | 2.397638 | 0.73099 | 3.28    | 0.001038 | 0.010919 |
| ZNF215   | 13.96188 | -2.22299 | 0.76001 | -2.925  | 0.003445 | 0.024189 |
| ZNF219   | 15.23847 | 1.425083 | 0.41755 | 3.413   | 0.000643 | 0.008075 |
| ZNF300   | 3.100734 | 4.976908 | 1.43001 | 3.48032 | 0.000501 | 0.00685  |
| ZNF300P1 | 4.589267 | 2.670468 | 0.84277 | 3.16867 | 0.001531 | 0.014221 |
| ZNF358   | 15.85331 | 1.333223 | 0.47641 | 2.79848 | 0.005134 | 0.031288 |
| ZNF365   | 7.044954 | 3.218113 | 1.03102 | 3.1213  | 0.001801 | 0.015825 |
| ZNF367   | 8.307699 | 2.504655 | 0.7322  | 3.42074 | 0.000625 | 0.0079   |
| ZNF385B  | 7.564956 | 5.327814 | 1.69868 | 3.13644 | 0.00171  | 0.01529  |
| ZNF385D  | 18.50571 | 3.285068 | 1.05124 | 3.12494 | 0.001778 | 0.015711 |
| ZNF441   | 27.80043 | -1.06031 | 0.31691 | -3.3458 | 0.00082  | 0.009381 |
| ZNF483   | 11.97846 | 3.267335 | 0.86663 | 3.77015 | 0.000163 | 0.003155 |
| ZNF516   | 6.901921 | 1.988389 | 0.63203 | 3.14602 | 0.001655 | 0.014982 |
| ZNF519   | 10.57113 | 3.608263 | 1.2306  | 2.93211 | 0.003367 | 0.023911 |
| ZNF521   | 6.599246 | 2.253583 | 0.7795  | 2.89105 | 0.00384  | 0.026147 |
| ZNF536   | 4.051518 | 4.856741 | 1.52667 | 3.18126 | 0.001466 | 0.013815 |
| ZNF554   | 427.3951 | -1.03788 | 0.23269 | -4.4603 | 8.19E-06 | 0.000329 |
| ZNF555   | 27.60651 | -1.04932 | 0.3144  | -3.3376 | 0.000845 | 0.009513 |
| ZNF648   | 2.147273 | 3.847311 | 1.45839 | 2.63805 | 0.008339 | 0.042194 |
| ZNF696   | 2.875348 | 2.992243 | 0.96597 | 3.09765 | 0.001951 | 0.016624 |
| ZNF702P  | 249.1017 | -1.16478 | 0.21022 | -5.5408 | 3.01E-08 | 3.45E-06 |
| ZNF704   | 52.86703 | 1.195651 | 0.35309 | 3.38622 | 0.000709 | 0.008492 |
| ZNF711   | 3.35179  | 3.45604  | 1.30528 | 2.64774 | 0.008103 | 0.041517 |
| ZNF716   | 4.376386 | 4.491205 | 1.74107 | 2.57957 | 0.009892 | 0.047358 |
| ZNF726   | 5.071979 | 2.409417 | 0.92651 | 2.60053 | 0.009308 | 0.045615 |
| ZNF775   | 2.161936 | 2.852349 | 1.05973 | 2.69158 | 0.007111 | 0.038158 |
| ZNF826P  | 1.642412 | 3.590432 | 1.16341 | 3.08613 | 0.002028 | 0.017021 |
| ZNF831   | 10.96967 | 2.235503 | 0.79949 | 2.79617 | 0.005171 | 0.03143  |
| ZNF852   | 13.12104 | -1.0705  | 0.37049 | -2.8894 | 0.00386  | 0.026185 |
| ZNF99    | 5.297598 | 5.285307 | 1.4904  | 3.54624 | 0.000391 | 0.005772 |
| ZBPB     | 4.243928 | 4.932593 | 1.74756 | 2.82255 | 0.004764 | 0.029808 |
| ZSWIM2   | 5.545653 | 2.030041 | 0.78008 | 2.60234 | 0.009259 | 0.045472 |
| ZSWIM6   | 7.671049 | 1.868565 | 0.68748 | 2.71798 | 0.006568 | 0.036312 |
| ZSWIM9   | 20.70031 | 1.210481 | 0.39681 | 3.05052 | 0.002284 | 0.01855  |

|       |          |          |         |        |          |          |
|-------|----------|----------|---------|--------|----------|----------|
| ZWINT | 6.942726 | 2.366267 | 0.89628 | 2.6401 | 0.008288 | 0.042031 |
|-------|----------|----------|---------|--------|----------|----------|
